# Supplementary material for: Differential Oligomerization of Alpha versus Beta Amino Acids and Hydroxy Acids in Abiotic Proto-Peptide Synthesis Reactions
Source: MDPI journal article supplement (doi:10.3390/life12020265), 2022-02-10
Supplement: s1 [file s1]

# Supporting Information

## **Differential Oligomerization of Alpha Versus Beta Amino Acids and Hydroxy Acids in Abiotic Proto-peptide Synthesis Reactions**

Moran Frenkel-Pinter<sup>a,b,c†</sup>, Kaitlin C Jacobson<sup>a,b†</sup>, Jonathan Eskew-Martin<sup>a,d</sup>, Jay G Forsythe<sup>a,d</sup>, Martha A Grover<sup>a,e</sup>, Loren Dean Williams<sup>a,b\*</sup> and Nicholas V Hud<sup>a,b\*</sup>

<sup>a</sup> NSF-NASA Center for Chemical Evolution, Georgia Institute of Technology, Atlanta, GA 30332 (USA)

<sup>b</sup> School of Chemistry & Biochemistry, Georgia Institute of Technology, Atlanta, GA 30332 (USA)

<sup>c</sup> Institute of Chemistry, The Hebrew University of Jerusalem, Israel 91904

<sup>d</sup> Department of Chemistry and Biochemistry, College of Charleston, Charleston, SC, 29424, USA

<sup>e</sup> School of Chemical & Biomolecular Engineering, Georgia Institute of Technology, Atlanta, GA 30332 (USA)

<sup>†</sup>Authors contributed equally

# Table of Contents

|                                                                                                                                                                             |    |
|-----------------------------------------------------------------------------------------------------------------------------------------------------------------------------|----|
| Supplementary Methods .....                                                                                                                                                 | 9  |
| Synthesis of glc $\beta$ -Aba .....                                                                                                                                         | 9  |
| Synthesis of lac $\beta$ -Aba.....                                                                                                                                          | 9  |
| Synthesis of hpa $\beta$ -Aba.....                                                                                                                                          | 10 |
| Table S1. Summary of MALDI mass spectrometry analysis of single-step dry-down reactions and dry/wet cycling reactions of alpha and beta hydroxy acids and amino acids. .... | 11 |
| Supplementary Figures.....                                                                                                                                                  | 13 |
| Figure S1. MS of a single-step dry-down reaction of glycolic acid (glc) and glycine (Gly) supports the formation of depsipeptides. ....                                     | 14 |
| Figure S2. MS of a single-step dry-down reaction of glycolic acid (glc) and alanine (Ala) supports the formation of depsipeptides.....                                      | 15 |
| Figure S3. MS of a single-step dry-down reaction of glycolic acid (glc) and beta-alanine ( $\beta$ -Ala) supports the formation of depsipeptides.....                       | 16 |
| Figure S4. MS of a single-step dry-down reaction of glycolic acid (glc) and beta-aminobutyric acid ( $\beta$ -Aba) supports the formation of depsipeptides.....             | 17 |
| Figure S5. MS of a single-step dry-down reaction of lactic acid (lac) and glycine (Gly) supports the formation of depsipeptides. ....                                       | 18 |
| Figure S6. MS of a single-step dry-down reaction of lactic acid (lac) and alanine (Ala) supports the formation of depsipeptides.....                                        | 19 |
| Figure S7. MS of a single-step dry-down reaction of lactic acid (lac) and beta-alanine ( $\beta$ -Ala) supports the formation of depsipeptides.....                         | 20 |
| Figure S8. MS of a single-step dry-down reaction of lactic acid (lac) and beta-aminobutyric acid ( $\beta$ -Aba) supports the formation of depsipeptides.....               | 21 |
| Figure S9. MS of a single-step dry-down reaction of 3-hydroxypropanoic acid (hpa) and glycine (Gly) supports the formation of depsipeptides.....                            | 23 |
| Figure S10. MS of a single-step dry-down reaction of 3-hydroxypropanoic acid (hpa) and alanine (Ala) supports the formation of depsipeptides.....                           | 24 |
| Figure S11. MS of a single-step dry-down reaction of 3-hydroxypropanoic acid (hpa) and beta-alanine ( $\beta$ -Ala) supports the formation of depsipeptides.....            | 25 |
| Figure S12. MS of a single-step dry-down reaction of 3-hydroxypropanoic acid (hpa) and beta-aminobutyric acid ( $\beta$ -Aba) supports the formation of depsipeptides. .... | 26 |

|                                                                                                                                                                                             |    |
|---------------------------------------------------------------------------------------------------------------------------------------------------------------------------------------------|----|
| Figure S13. MS of a single-step dry-down reaction of 3-hydroxybutanoic acid (hba) and glycine (Gly) supports the formation of depsipeptides. ....                                           | 27 |
| Figure S14. MS of a single-step dry-down reaction of 3-hydroxybutanoic acid (hba) and alanine (Ala) supports the formation of depsipeptides. ....                                           | 28 |
| Figure S15. MS of a single-step dry-down reaction of 3-hydroxybutanoic acid (hba) and beta-alanine ( $\beta$ -Ala) supports the formation of depsipeptides.....                             | 30 |
| Figure S16. MS of a single-step dry-down reaction of 3-hydroxybutanoic acid (hba) and beta-aminobutyric acid ( $\beta$ -Aba) supports the formation of depsipeptides.....                   | 31 |
| Figure S17. ESI-MS analysis of control single-step dry-down reactions of the hydroxy acids in the absence of amino acids. ....                                                              | 32 |
| Figure S18. Analysis of control single-step dry-down reactions of the amino acids in the absence of hydroxy acids. ....                                                                     | 33 |
| Figure S19. ESI-MS analysis of stock solutions of $\beta$ -amino acids before single-step dry-down reactions shows the existence of some peptide dimers are present prior to reaction. .... | 34 |
| Figure S20. FTIR spectra changes upon single-step dry-down reactions of glycolic acid (glc) and glycine (Gly) support the formation of depsipeptides. ....                                  | 35 |
| Figure S21. FTIR spectra changes upon single-step dry-down reactions of glycolic acid (glc) and alanine (Ala) support the formation of depsipeptides.....                                   | 36 |
| Figure S22. FTIR spectra changes upon single-step dry-down reactions of glycolic acid (glc) and beta-alanine ( $\beta$ -Ala) support the formation of depsipeptides.....                    | 37 |
| Figure S23. FTIR spectra changes upon single-step dry-down reactions of glycolic acid (glc) and beta-aminobutyric acid ( $\beta$ -Aba) support the formation of depsipeptides.....          | 38 |
| Figure S24. FTIR spectra changes upon single-step dry-down reactions of lactic acid (lac) and glycine (Gly) support the formation of depsipeptides. ....                                    | 39 |
| Figure S25. FTIR spectra changes upon single-step dry-down reactions of lactic acid (lac) and alanine (Ala) support the formation of depsipeptides. ....                                    | 40 |
| Figure S26. FTIR spectra changes upon single-step dry-down reactions of lactic acid (lac) and beta-alanine ( $\beta$ -Ala) support the formation of depsipeptides.....                      | 41 |
| Figure S27. FTIR spectra changes upon single-step dry-down reactions of lactic acid (lac) and beta-aminobutyric acid ( $\beta$ -Aba) support the formation of depsipeptides.....            | 42 |
| Figure S28. FTIR spectra changes upon single-step dry-down reactions of 3-hydroxypropanoic acid (hpa) and glycine (Gly) support the formation of depsipeptides.....                         | 43 |

|                                                                                                                                                                                              |    |
|----------------------------------------------------------------------------------------------------------------------------------------------------------------------------------------------|----|
| Figure S29. FTIR spectra changes upon single-step dry-down reactions of 3-hydroxypropanoic acid (hpa) and alanine (Ala) support the formation of depsipeptides.....                          | 44 |
| Figure 30. FTIR spectra changes upon single-step dry-down reactions of 3-hydroxypropanoic acid (hpa) and beta-alanine ( $\beta$ -Ala) support the formation of depsipeptides.....            | 45 |
| Figure S31. FTIR spectra changes upon single-step dry-down reactions of 3-hydroxypropanoic acid (hpa) and beta-aminobutyric acid ( $\beta$ -Aba) support the formation of depsipeptides..... | 46 |
| Figure S32. FTIR spectra changes upon single-step dry-down reactions of 3-hydroxybutanoic acid (hba) and glycine (Gly) support the formation of depsipeptides.....                           | 47 |
| Figure S33. FTIR spectra changes upon single-step dry-down reactions of 3-hydroxybutanoic acid (hba) and alanine (Ala) support the formation of depsipeptides.....                           | 48 |
| Figure S34. FTIR spectra changes upon single-step dry-down reactions of 3-hydroxybutanoic acid (hba) and beta-alanine ( $\beta$ -Ala) support the formation of depsipeptides.....            | 49 |
| Figure S35. FTIR spectra changes upon single-step dry-down reactions of 3-hydroxybutanoic acid (hba) and beta-aminobutyric acid ( $\beta$ -Aba) support the formation of depsipeptides.....  | 50 |
| Figure S36. Circular Dichroism spectra of glycolic acid (glc) single-step dry-down reactions and dry/wet cycling reactions with the amino acids. ....                                        | 51 |
| Figure S37. Circular Dichroism spectra of lactic acid (lac) single-step dry-down reactions and dry/wet cycling reactions with the amino acids. ....                                          | 52 |
| Figure S38. Circular Dichroism spectra of 3-hydroxypropanoic acid (hpa) single-step dry-down reactions and dry/wet cycling reactions with the amino acids.....                               | 53 |
| Figure S39. Circular Dichroism spectra of 3-hydroxybutanoic acid (hba) single-step dry-down reactions and dry/wet cycling reactions with the amino acids. ....                               | 54 |
| Figure S40. C18-HPLC analysis verifies the formation of depsipeptides following single-step dry-down reactions and dry/wet cycling reactions of glycolic acid (glc) and glycine (Gly).....   | 55 |
| Figure S41. C18-HPLC analysis verifies the formation of depsipeptides following single-step dry-down reactions and dry/wet cycling reactions of glycolic acid (glc) and alanine (Ala).....   | 56 |



|                                                                                                                                                                                                                                 |    |
|---------------------------------------------------------------------------------------------------------------------------------------------------------------------------------------------------------------------------------|----|
| Figure S42. C18-HPLC analysis verifies the formation of depsipeptides following single-step dry-down reactions and dry/wet cycling reactions of glycolic acid (glc) and beta-alanine ( $\beta$ -Ala). .....                     | 57 |
| Figure S43. C18-HPLC analysis verifies the formation of depsipeptides following single-step dry-down reactions and dry/wet cycling reactions of glycolic acid (glc) and beta-aminobutyric acid ( $\beta$ -Aba). .....           | 59 |
| Figure S44. C18-HPLC analysis verifies the formation of depsipeptides following single-step dry-down reactions and dry/wet cycling reactions of lactic acid (lac) and glycine (Gly). .....                                      | 60 |
| Figure S45. C18-HPLC analysis verifies the formation of depsipeptides following single-step dry-down reactions and dry/wet cycling reactions of lactic acid (lac) and alanine (Ala). .....                                      | 61 |
| Figure S46. C18-HPLC analysis verifies the formation of depsipeptides following single-step dry-down reactions and dry/wet cycling reactions of lactic acid (lac) and beta-alanine ( $\beta$ -Ala). .....                       | 62 |
| Figure S47. C18-HPLC analysis verifies the formation of depsipeptides following single-step dry-down reactions and dry/wet cycling reactions of lactic acid (lac) and beta-aminobutyric acid ( $\beta$ -Aba). .....             | 63 |
| Figure S48. C18-HPLC analysis verifies the formation of depsipeptides following single-step dry-down reactions and dry/wet cycling reactions of 3-hydroxypropanoic acid (hpa) and glycine (Gly). .....                          | 64 |
| Figure S49. C18-HPLC analysis verifies the formation of depsipeptides following single-step dry-down reactions and dry/wet cycling reactions of 3-hydroxypropanoic acid (hpa) and alanine (Ala). .....                          | 65 |
| Figure S50. C18-HPLC analysis verifies the formation of depsipeptides following single-step dry-down reactions and dry/wet cycling reactions of 3-hydroxypropanoic acid (hpa) and beta-alanine ( $\beta$ -Ala). .....           | 67 |
| Figure S51. C18-HPLC analysis verifies the formation of depsipeptides following single-step dry-down reactions and dry/wet cycling reactions of 3-hydroxypropanoic acid (hpa) and beta-aminobutyric acid ( $\beta$ -Aba). ..... | 68 |
| Figure S52. C18-HPLC analysis verifies the formation of depsipeptides following single-step dry-down reactions and dry/wet cycling reactions of 3-hydroxybutanoic acid (hba) and glycine (Gly). .....                           | 69 |
| Figure S53. C18-HPLC analysis verifies the formation of depsipeptides following single-step dry-down reactions and dry/wet cycling reactions of 3-hydroxybutanoic acid (hba) and alanine (Ala). .....                           | 70 |

|                                                                                                                                                                                                                          |    |
|--------------------------------------------------------------------------------------------------------------------------------------------------------------------------------------------------------------------------|----|
| Figure S54. C18-HPLC analysis verifies the formation of depsipeptides following single-step dry-down reactions and dry/wet cycling reactions of 3-hydroxybutanoic acid (hba) and beta-alanine ( $\beta$ -Ala).           | 71 |
| Figure S55. C18-HPLC analysis verifies the formation of depsipeptides following single-step dry-down reactions and dry/wet cycling reactions of 3-hydroxybutanoic acid (hba) and beta-aminobutyric acid ( $\beta$ -Aba). | 72 |
| Figure S56. C18-HPLC analysis of single-step dry-down reactions of beta-aminobutyric acid ( $\beta$ -Aba) overlaid with authentic standards.                                                                             | 74 |
| Figure S57. C18-HPLC analysis of control single-step dry-down and dry/wet cycling reactions of the hydroxy acids in the absence of amino acids.                                                                          | 75 |
| Figure S58. C18-HPLC analysis of control single-step dry-down reactions of the amino acids in the absence of hydroxy acids.                                                                                              | 76 |
| Figure S59. $^1\text{H}$ NMR spectra exhibit the extent of depsipeptide formation upon (A) single-step dry-down reactions and (B) dry/wet cycling of glycolic acid (glc) and glycine (Gly).                              | 77 |
| Figure S60. $^1\text{H}$ NMR spectra exhibit the extent of depsipeptide formation upon (a) single-step dry-down reactions and (b) dry/wet cycling of glycolic acid (glc) and alanine (Ala).                              | 78 |
| Figure S61. $^1\text{H}$ NMR spectra exhibit the extent of depsipeptide formation upon (a) single-step dry-down reactions and (b) dry/wet cycling of glycolic acid (glc) and beta-alanine ( $\beta$ -Ala).               | 79 |
| Figure S62. $^1\text{H}$ NMR spectra exhibit the extent of depsipeptide formation upon (a) single-step dry-down reactions and (b) dry/wet cycling of glycolic acid (glc) and beta-aminobutyric acid ( $\beta$ -Aba).     | 80 |
| Figure S63. $^1\text{H}$ NMR spectra exhibit the extent of depsipeptide formation upon (a) single-step dry-down reactions and (b) dry/wet cycling of lactic acid (lac) and glycine (Gly).                                | 82 |
| Figure S64. $^1\text{H}$ NMR spectra exhibit the extent of depsipeptide formation upon (a) single-step dry-down reactions and (b) dry/wet cycling of lactic acid (lac) and alanine (Ala).                                | 83 |
| Figure S65. $^1\text{H}$ NMR spectra exhibit the extent of depsipeptide formation upon (a) single-step dry-down reactions and (b) dry/wet cycling of lactic acid (lac) and beta-alanine ( $\beta$ -Ala).                 | 84 |
| Figure S66. $^1\text{H}$ NMR spectra exhibit the extent of depsipeptide formation upon (a) single-step dry-down reactions and (b) dry/wet cycling of lactic acid (lac) and beta-aminobutyric acid ( $\beta$ -Aba).       | 85 |

|                                                                                                                                                                                                                                |    |
|--------------------------------------------------------------------------------------------------------------------------------------------------------------------------------------------------------------------------------|----|
| Figure S67. <sup>1</sup> H NMR spectra exhibit the extent of depsipeptide formation upon (a) single-step dry-down reactions and (b) dry/wet cycling of 3-hydroxypropanoic acid (hpa) and glycine (Gly). .....                  | 86 |
| Figure S68. <sup>1</sup> H NMR spectra exhibit the extent of depsipeptide formation upon (a) single-step dry-down reactions and (b) dry/wet cycling of 3-hydroxypropanoic acid (hpa) and alanine (Ala). .....                  | 87 |
| Figure S69. <sup>1</sup> H NMR spectra exhibit the extent of depsipeptide formation upon (a) single-step dry-down reactions and (b) dry/wet cycling of 3-hydroxypropanoic acid (hpa) and beta-alanine (β-Ala). .....           | 89 |
| Figure S70. <sup>1</sup> H NMR spectra exhibit the extent of depsipeptide formation upon (a) single-step dry-down reactions and (b) dry/wet cycling of 3-hydroxypropanoic acid (hpa) and beta-aminobutyric acid (β-Aba). ..... | 90 |
| Figure S71. <sup>1</sup> H NMR spectra exhibit the extent of depsipeptide formation upon (a) single-step dry-down reactions and (b) dry/wet cycling of 3-hydroxybutanoic acid (hba) and glycine (Gly). .....                   | 91 |
| Figure S72. <sup>1</sup> H NMR spectra exhibit the extent of depsipeptide formation upon (a) single-step dry-down reactions and (b) dry/wet cycling of 3-hydroxybutanoic acid (hba) and alanine (Ala). .....                   | 92 |
| Figure S73. <sup>1</sup> H NMR spectra exhibit the extent of depsipeptide formation upon (a) single-step dry-down reactions and (b) dry/wet cycling of 3-hydroxybutanoic acid (hba) and beta-alanine (β-Ala). .....            | 93 |
| Figure S74. <sup>1</sup> H NMR spectra exhibit the extent of depsipeptide formation upon (a) single-step dry-down reactions and (b) dry/wet cycling of 3-hydroxybutanoic acid (hba) and beta-aminobutyric acid (β-Aba). .....  | 94 |
| Figure S75. <sup>1</sup> H NMR spectra of replicates of lactic acid (lac) and alanine (Ala) single-step dry-down reactions confirms reproducibility of extent of amino acid conversion. ....                                   | 96 |
| Figure S76. ESI-MS of the last cycle in the extended dry/wet cycling reaction of lactic acid (lac) and alanine (Ala) supports the formation of depsipeptides. ....                                                             | 97 |
| Figure S77. ESI-MS of the last cycle in the extended dry/wet cycling reaction of lactic acid (lac) and β-aminobutyric acid (β-Aba) supports the formation of depsipeptides. ....                                               | 98 |
| Figure S78. ESI-MS of the last cycle in the extended dry/wet cycling reaction of 3-hydroxybutanoic acid (hba) and alanine (Ala) supports the formation of depsipeptides. ....                                                  | 99 |

|                                                                                                                                                                                                                            |     |
|----------------------------------------------------------------------------------------------------------------------------------------------------------------------------------------------------------------------------|-----|
| Figure S79. ESI-MS of the last cycle in the extended dry/wet cycling reaction of 3-hydroxybutanoic acid (hba) and $\beta$ -aminobutyric acid ( $\beta$ -Aba) supports the formation of depsipeptides.....                  | 100 |
| Figure S80. C18-HPLC analysis following weekly dry/wet cycling of lactic acid (lac) and Alanine (Ala) verifies the formation of depsipeptides.....                                                                         | 101 |
| Figure S81. C18-HPLC analysis following weekly dry/wet cycling of lactic acid (lac) and $\beta$ -aminobutyric acid ( $\beta$ -Aba) verifies the formation of depsipeptides.....                                            | 102 |
| Figure S82. C18-HPLC analysis following weekly dry/wet cycling of 3-hydroxybutanoic acid (hba) and alanine (Ala) verifies the formation of depsipeptides.....                                                              | 103 |
| Figure S83. C18-HPLC analysis following weekly dry/wet cycling of 3-hydroxybutanoic acid (hba) and $\beta$ -aminobutyric acid ( $\beta$ -Aba) verifies the formation of depsipeptides.....                                 | 104 |
| Figure S84. $^1\text{H}$ NMR spectra exhibit the extent of depsipeptide formation upon the final cycle of the extended dry/wet cycling of lactic acid (lac) and alanine (Ala). .                                           | 106 |
| Figure S85. $^1\text{H}$ NMR spectra exhibit the extent of depsipeptide formation upon the final cycle of the extended dry/wet cycling of lactic acid (lac) and $\beta$ -aminobutyric acid ( $\beta$ -Aba). .....          | 107 |
| Figure S86. $^1\text{H}$ NMR spectra exhibit the extent of depsipeptide formation upon the final cycle of the extended dry/wet cycling of hydroxybutanoic acid (hba) and alanine (Ala). .....                              | 108 |
| Figure S87. $^1\text{H}$ NMR spectra exhibit the extent of depsipeptide formation upon the final cycle of the extended dry/wet cycling of hydroxybutanoic acid (hba) and $\beta$ -aminobutyric acid ( $\beta$ -Aba). ..... | 109 |

## Supplementary Methods

### Synthesis of glc $\beta$ -Aba

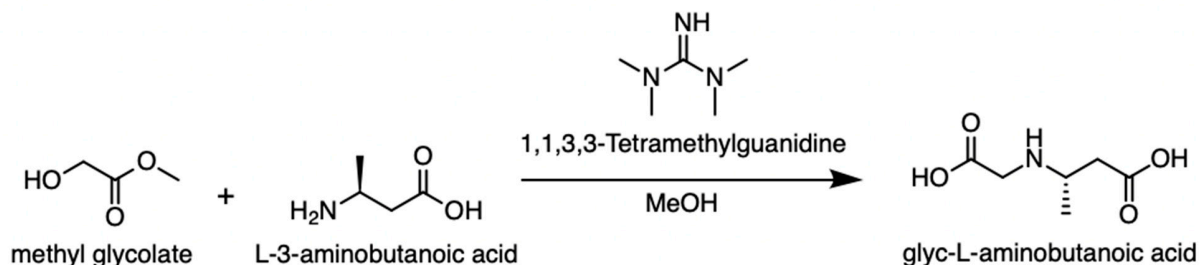

Methyl glycolate (300  $\mu$ L, 3.88 mmol) and L-3-Aminobutanoic acid (400 mg, 3.88 mmol) were dissolved in a 1,1,3,3-Tetramethylguanidine (975  $\mu$ L) and Methanol (777  $\mu$ L) and reacted at 180  $^{\circ}$ C for 12 hours. Product was purified using preparative HPLC using a C18 column.

$^1\text{H}$  NMR (500 MHz, D $_2$ O):  $\delta$  = 4.325 (m, 1H), 4.04 (s, 2H), 2.59 (br d, 2H), 1.23 (d, 3H).

### Synthesis of lac $\beta$ -Aba

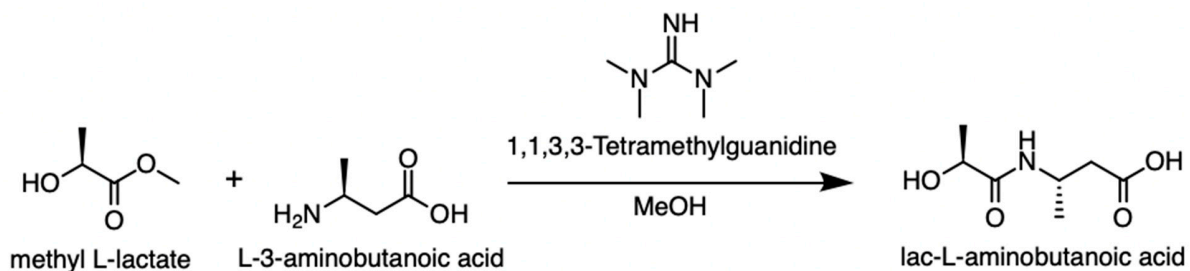

Methyl L-lactate (300  $\mu$ L, 3.15 mmol) and L-3-Aminobutanoic acid (325 mg, 3.15 mmol) were dissolved in a 1,1,3,3-Tetramethylguanidine (790  $\mu$ L) and Methanol (630  $\mu$ L) and reacted at 180 $^{\circ}$ C for 12 hours. Product was purified using preparative HPLC using a C18 column.

$^1\text{H}$  NMR (500 MHz,  $\text{D}_2\text{O}$ ):  $\delta$  = 4.28 (m, 1H), 4.21 (q, 1H), 2.58 (br d, 2H), 1.34 (d, 3H), 1.22 (d, 3H).

### Synthesis of hpa $\beta$ -Aba

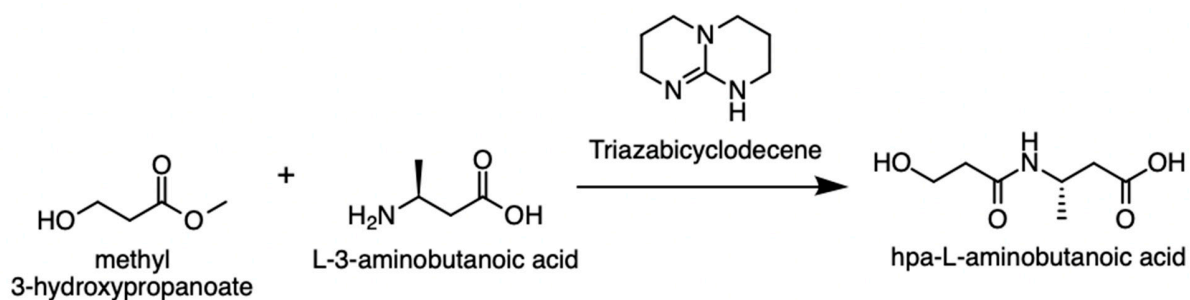

Methyl 3-hydroxypropanoate (400  $\mu\text{L}$ , 4.22 mmol) and L-3-Aminobutanoic acid (552 mg, 5.35 mmol) were mixed with Triazabicyclodecene (1193 mg) and reacted at  $135^\circ\text{C}$  for 8 hours. Product was purified using preparative HPLC using a C18 column.

$^1\text{H}$  NMR (500 MHz,  $\text{D}_2\text{O}$ ):  $\delta$  = 4.265 (m, 1H), 3.81 (t, 2H), 2.56 (br d, 2H), 2.44 (t, 2H), 1.21 (d, 3H). High resolution.

**Table S1. Summary of MALDI mass spectrometry analysis of single-step dry-down reactions and dry/wet cycling reactions of alpha and beta hydroxy acids and amino acids.**

| Sample Name                                                                                            | Preparation Method | Maximal Oligomer Length | Dominant Species              |
|--------------------------------------------------------------------------------------------------------|--------------------|-------------------------|-------------------------------|
| glycolic acid ( <b>glc</b> ) and alanine ( <b>Ala</b> )                                                | dry                | 25                      | <b>glc</b>                    |
| glycolic acid ( <b>glc</b> ) and alanine ( <b>Ala</b> )                                                | dry/wet            | 12                      | even mix                      |
| glycolic acid ( <b>glc</b> ) and glycine ( <b>Gly</b> )                                                | dry                | 23                      | <b>glc</b>                    |
| glycolic acid ( <b>glc</b> ) and glycine ( <b>Gly</b> )                                                | dry/wet            | 15                      | <b>glc</b>                    |
| glycolic acid ( <b>glc</b> ) and $\beta$ -alanine ( <b><math>\beta</math>-Ala</b> )                    | dry                | 19                      | <b><math>\beta</math>-Ala</b> |
| glycolic acid ( <b>glc</b> ) and $\beta$ -alanine ( <b><math>\beta</math>-Ala</b> )                    | dry/wet            | 12                      | <b><math>\beta</math>-Ala</b> |
| glycolic acid ( <b>glc</b> ) and $\beta$ -aminobutyric acid ( <b><math>\beta</math>-Aba</b> )          | dry                | 8                       | even mix                      |
| glycolic acid ( <b>glc</b> ) and $\beta$ -aminobutyric acid ( <b><math>\beta</math>-Aba</b> )          | dry/wet            | 8                       | <b><math>\beta</math>-Aba</b> |
| 3-hydroxybutanoic acid ( <b>hba</b> ) and alanine ( <b>Ala</b> )                                       | dry                | 14                      | <b>hba</b>                    |
| 3-hydroxybutanoic acid ( <b>hba</b> ) and alanine ( <b>Ala</b> )                                       | dry/wet            | 12                      | <b>hba</b>                    |
| 3-hydroxybutanoic acid ( <b>hba</b> ) and $\beta$ -alanine ( <b><math>\beta</math>-Ala</b> )           | dry                | 10                      | <b><math>\beta</math>-Ala</b> |
| 3-hydroxybutanoic acid ( <b>hba</b> ) and $\beta$ -alanine ( <b><math>\beta</math>-Ala</b> )           | dry/wet            | 9                       | <b><math>\beta</math>-Ala</b> |
| 3-hydroxybutanoic acid ( <b>hba</b> ) and $\beta$ -aminobutyric acid ( <b><math>\beta</math>-Aba</b> ) | dry                | 8                       | <b>hba</b>                    |
| 3-hydroxybutanoic acid ( <b>hba</b> ) and $\beta$ -aminobutyric acid ( <b><math>\beta</math>-Aba</b> ) | dry/wet            | 5                       | <b><math>\beta</math>-Aba</b> |
| 3-hydroxybutanoic acid ( <b>hba</b> ) and glycine ( <b>Gly</b> )                                       | dry                | 16                      | <b>hba</b>                    |
| 3-hydroxybutanoic acid ( <b>hba</b> ) and glycine ( <b>Gly</b> )                                       | dry/wet            | 9                       | <b>hba</b>                    |

|                                                                                                         |         |    |                               |
|---------------------------------------------------------------------------------------------------------|---------|----|-------------------------------|
| 3-hydroxypropionic acid ( <b>hpa</b> ) and alanine ( <b>Ala</b> )                                       | dry     | 19 | <b>hpa</b>                    |
| 3-hydroxypropionic acid ( <b>hpa</b> ) and alanine ( <b>Ala</b> )                                       | dry/wet | 14 | <b>hpa</b>                    |
| 3-hydroxypropionic acid ( <b>hpa</b> ) and $\beta$ -alanine ( <b><math>\beta</math>-Ala</b> )           | dry     | 14 | <b><math>\beta</math>-Ala</b> |
| 3-hydroxypropionic acid ( <b>hpa</b> ) and $\beta$ -alanine ( <b><math>\beta</math>-Ala</b> )           | dry/wet | 14 | <b><math>\beta</math>-Ala</b> |
| 3-hydroxypropionic acid ( <b>hpa</b> ) and $\beta$ -aminobutyric acid ( <b><math>\beta</math>-Aba</b> ) | dry     | 15 | <b>hpa</b>                    |
| 3-hydroxypropionic acid ( <b>hpa</b> ) and $\beta$ -aminobutyric acid ( <b><math>\beta</math>-Aba</b> ) | dry/wet | 11 | <b>hpa</b>                    |
| 3-hydroxypropionic acid ( <b>hpa</b> ) and glycine ( <b>Gly</b> )                                       | dry     | 19 | <b>hpa</b>                    |
| 3-hydroxypropionic acid ( <b>hpa</b> ) and glycine ( <b>Gly</b> )                                       | dry/wet | 17 | <b>hpa</b>                    |
| lactic acid ( <b>lac</b> ) and $\beta$ -aminobutyric acid ( <b><math>\beta</math>-Aba</b> )             | dry     | 5  | <b><math>\beta</math>-Aba</b> |
| lactic acid ( <b>lac</b> ) and $\beta$ -aminobutyric acid ( <b><math>\beta</math>-Aba</b> )             | dry/wet | 0  | no appreciable polymerization |
| lactic acid ( <b>lac</b> ) and alanine ( <b>Ala</b> )                                                   | dry     | 25 | <b>lac</b>                    |
| lactic acid ( <b>lac</b> ) and alanine ( <b>Ala</b> )                                                   | dry/wet | 14 | <b>lac</b>                    |
| lactic acid ( <b>lac</b> ) and $\beta$ -alanine ( <b><math>\beta</math>-Ala</b> )                       | dry     | 13 | <b><math>\beta</math>-Ala</b> |
| lactic acid ( <b>lac</b> ) and $\beta$ -alanine ( <b><math>\beta</math>-Ala</b> )                       | dry/wet | 8  | <b><math>\beta</math>-Ala</b> |
| lactic acid ( <b>lac</b> ) and glycine ( <b>Gly</b> )                                                   | dry     | 25 | <b>lac</b>                    |
| lactic acid ( <b>lac</b> ) and glycine ( <b>Gly</b> )                                                   | dry/wet | 14 | <b>Gly</b>                    |



Supplementary Figures

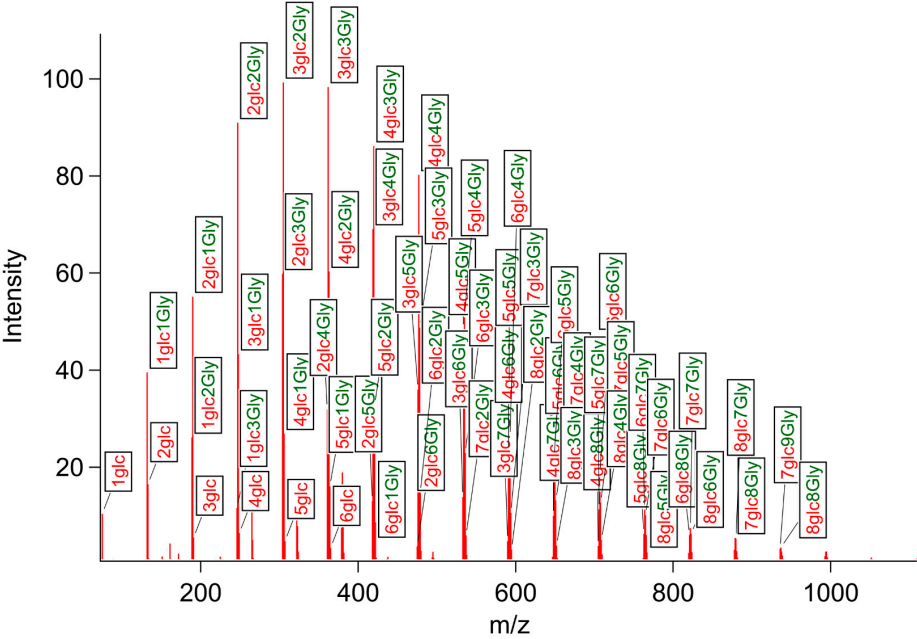

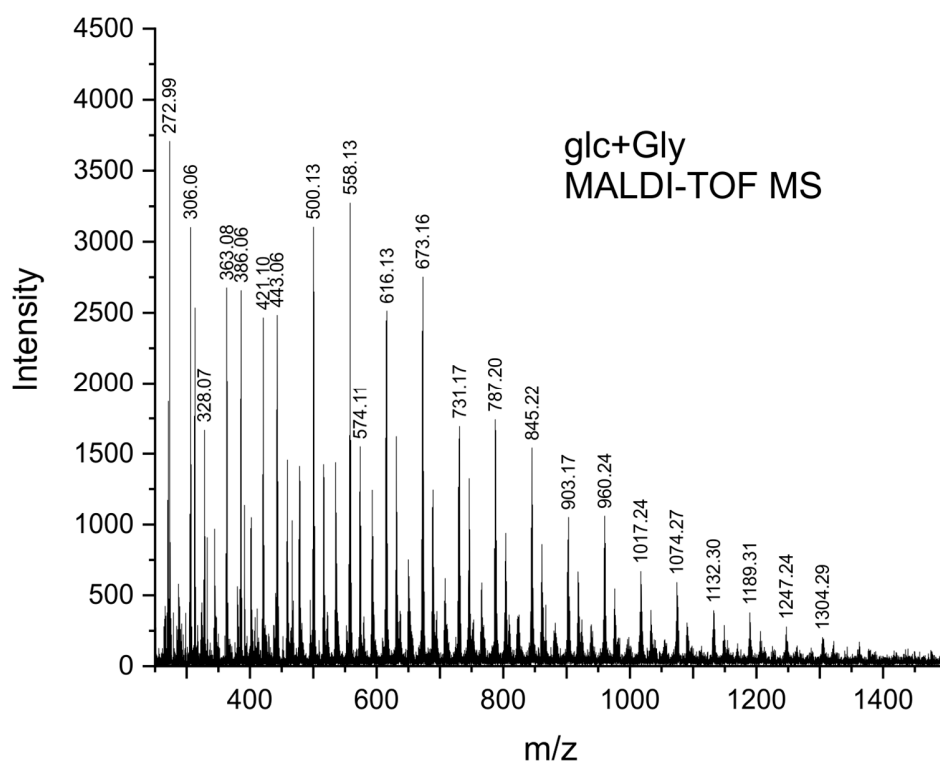

**Figure S1. MS of a single-step dry-down reaction of glycolic acid (glc) and glycine (Gly) supports the formation of depsipeptides.** glc and Gly were dried at 85 °C for seven days and the resulting depsipeptides were analyzed by negative-mode ESI-MS and MALDI-TOF MS, indicating a variety of depsipeptides. **glc** is labeled in red, **Gly** is labeled in green. All labeled species correspond to  $[M-H]^-$  ions.

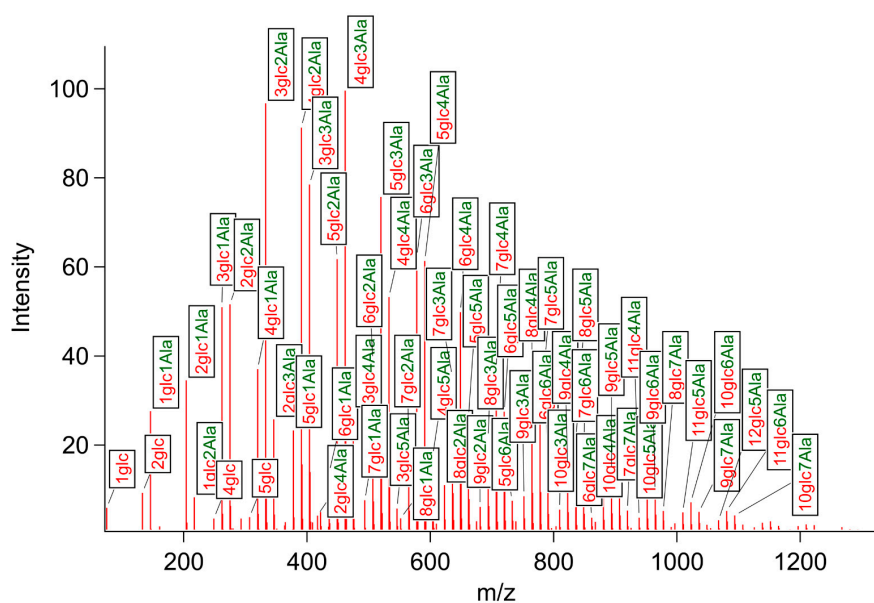

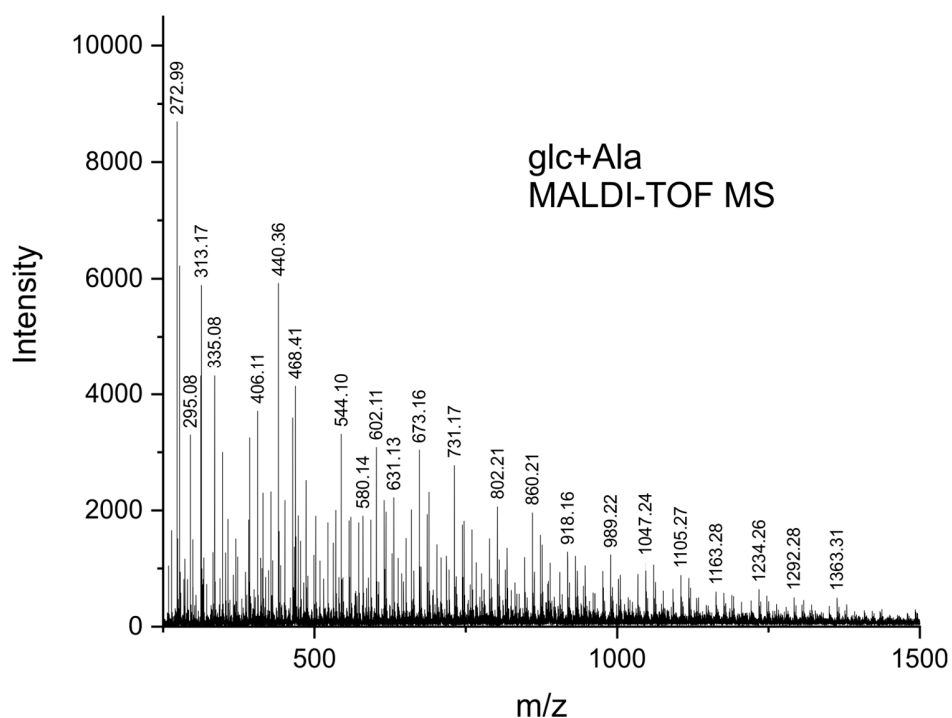

**Figure S2. MS of a single-step dry-down reaction of glycolic acid (glc) and alanine (Ala) supports the formation of depsipeptides.** glc and Ala were dried at 85 °C for seven days and the resulting depsipeptides were analyzed by negative-mode ESI-MS and MALDI-TOF MS, indicating a variety of depsipeptides. **glc** is labeled in red, **Ala** is labeled in green. All labeled species correspond to  $[M-H]^-$  ions.

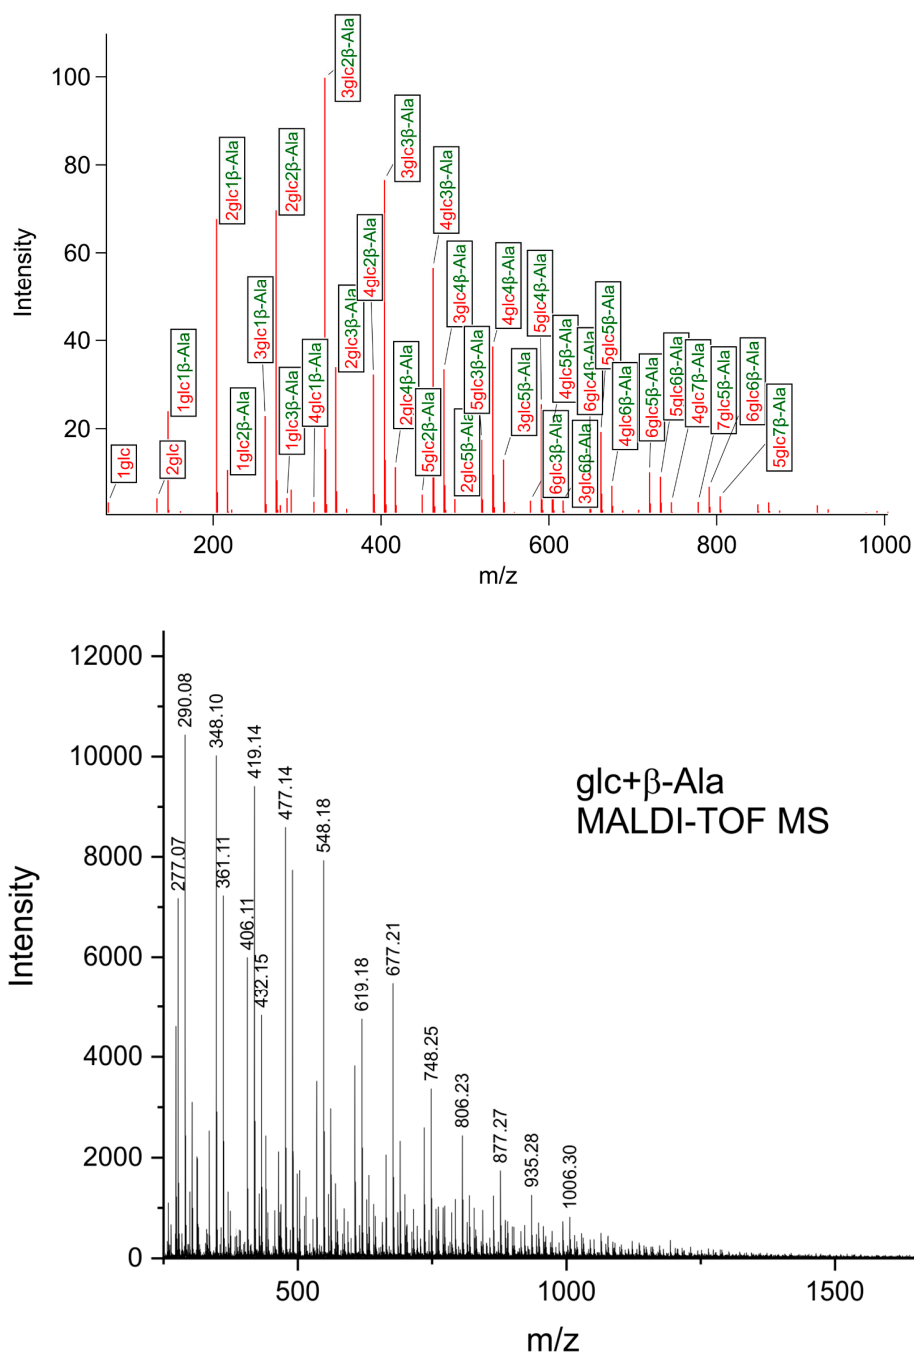

**Figure S3.** MS of a single-step dry-down reaction of glycolic acid (glc) and beta-alanine ( $\beta$ -Ala) supports the formation of depsipeptides. glc and  $\beta$ -Ala were dried at 85 °C for seven days and the resulting depsipeptides were analyzed by negative-mode ESI-MS and MALDI-TOF MS, indicating a variety of depsipeptides. **glc** is labeled in red;  $\beta$ -Ala is labeled in green. All labeled species correspond to  $[M-H]^-$  ions.

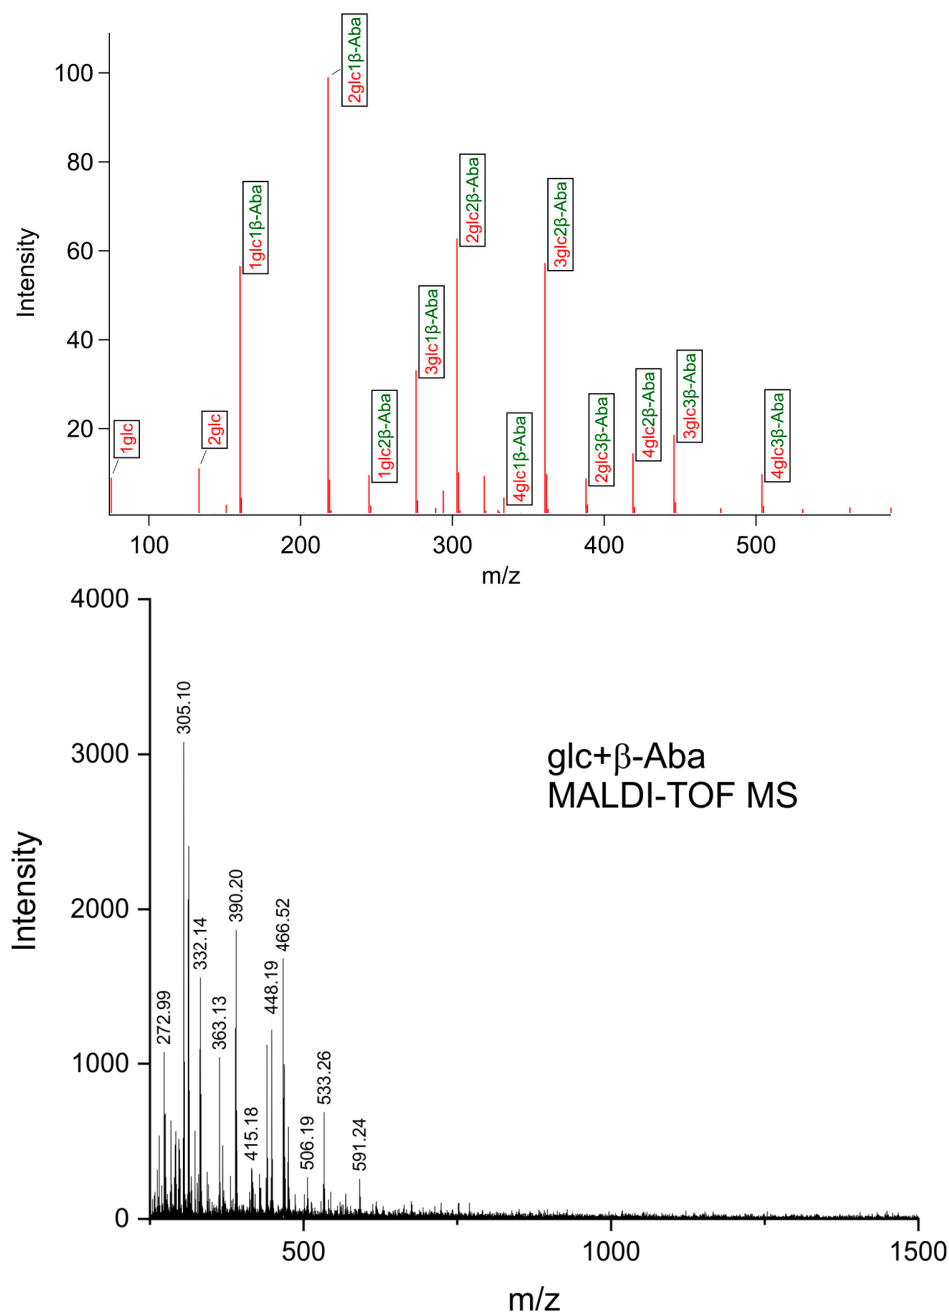

**Figure S4.** MS of a single-step dry-down reaction of glycolic acid (glc) and beta-aminobutyric acid ( $\beta$ -Aba) supports the formation of depsipeptides. glc and  $\beta$ -Aba were dried at 85 °C for seven days and the resulting depsipeptides were analyzed by negative-mode ESI-MS and MALDI-TOF MS, indicating a variety of depsipeptides. **glc** is labeled in red;  **$\beta$ -Aba** is labeled in green. All labeled species correspond to  $[M-H]^-$  ions.

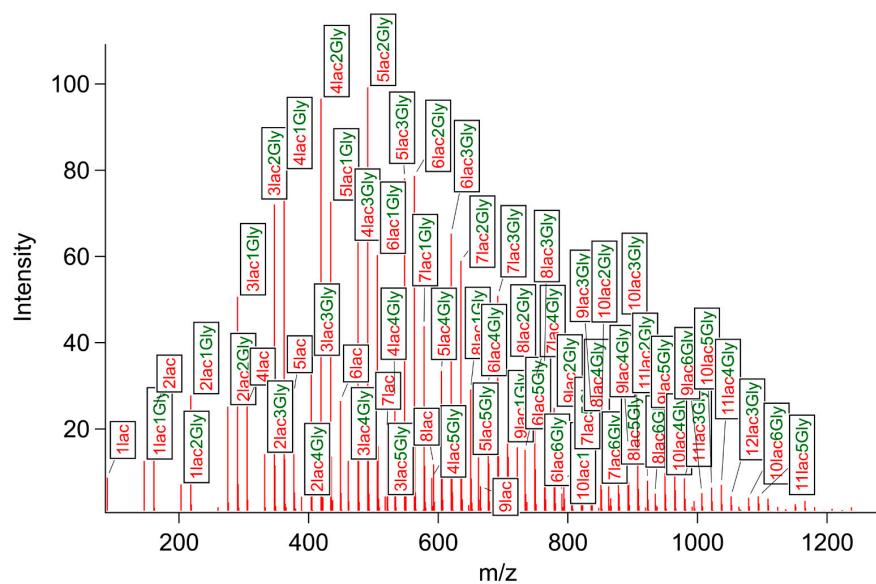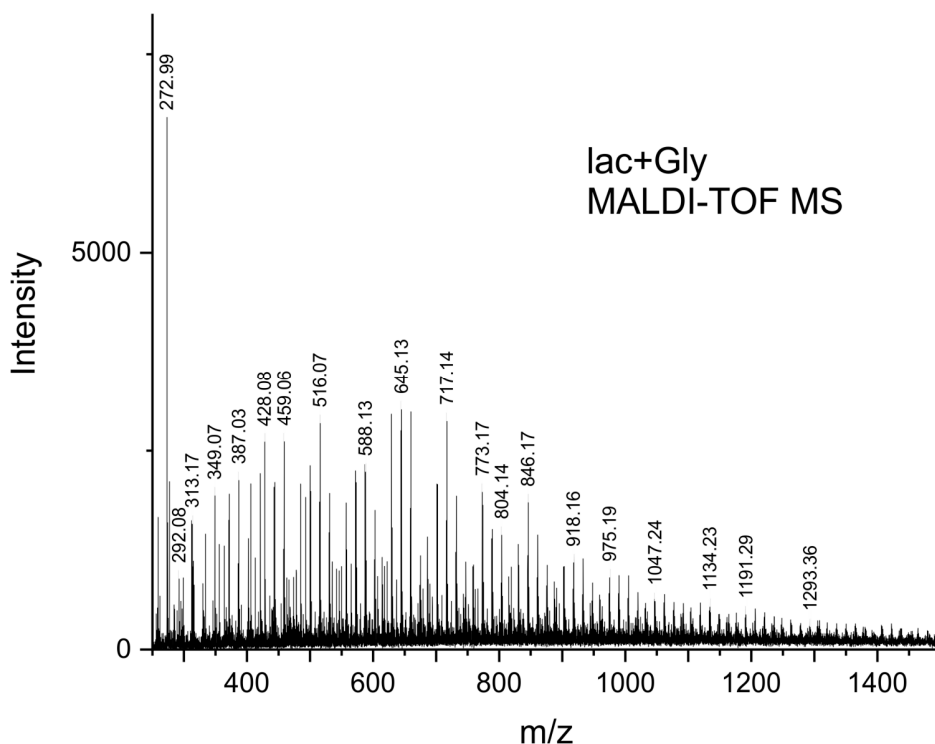

**Figure S5. MS of a single-step dry-down reaction of lactic acid (lac) and glycine (Gly) supports the formation of depsipeptides.** lac and Gly were dried at 85 °C for seven days and the resulting depsipeptides were analyzed by negative-mode ESI-MS and MALDI-TOF MS, indicating a variety of depsipeptides. lac is labeled in red; Gly is labeled in green. All labeled species correspond to  $[M-H]^-$  ions.

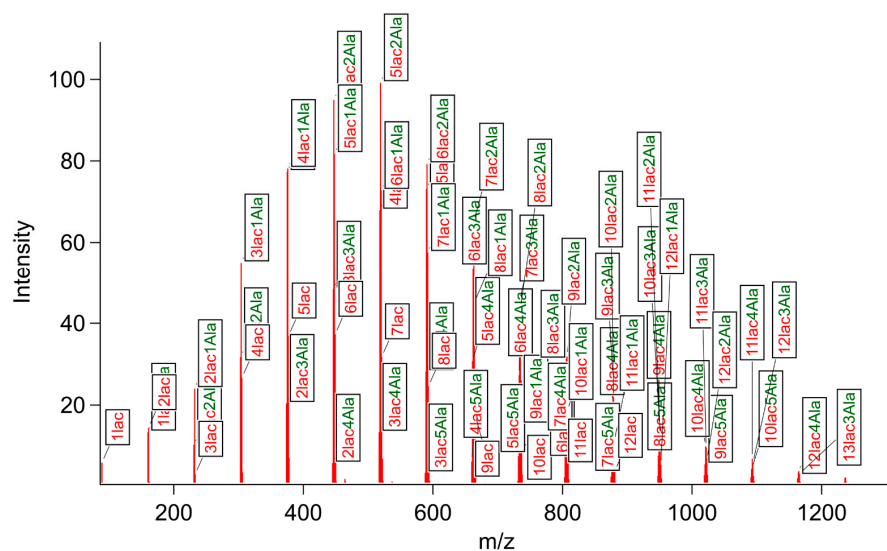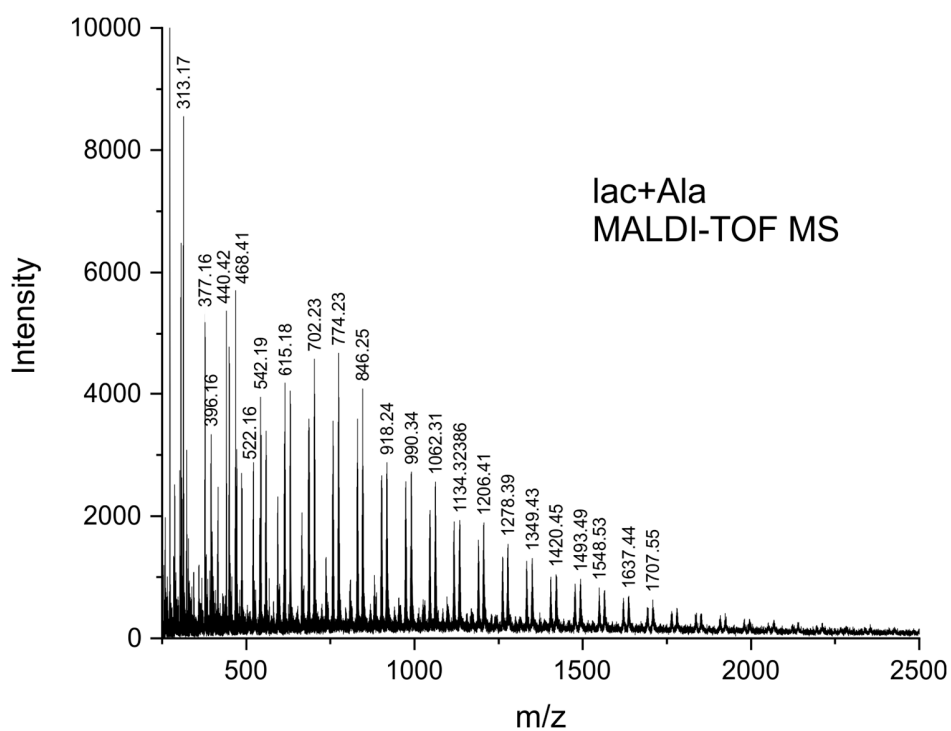

**Figure S6.** MS of a single-step dry-down reaction of lactic acid (lac) and alanine (Ala) supports the formation of depsipeptides. lac and Ala were dried at 85 °C for seven days and the resulting depsipeptides were analyzed by negative-mode ESI-MS and MALDI-TOF MS, indicating a variety of depsipeptides. lac is labeled in red; Ala is labeled in green. All labeled species correspond to  $[M-H]^-$  ions.

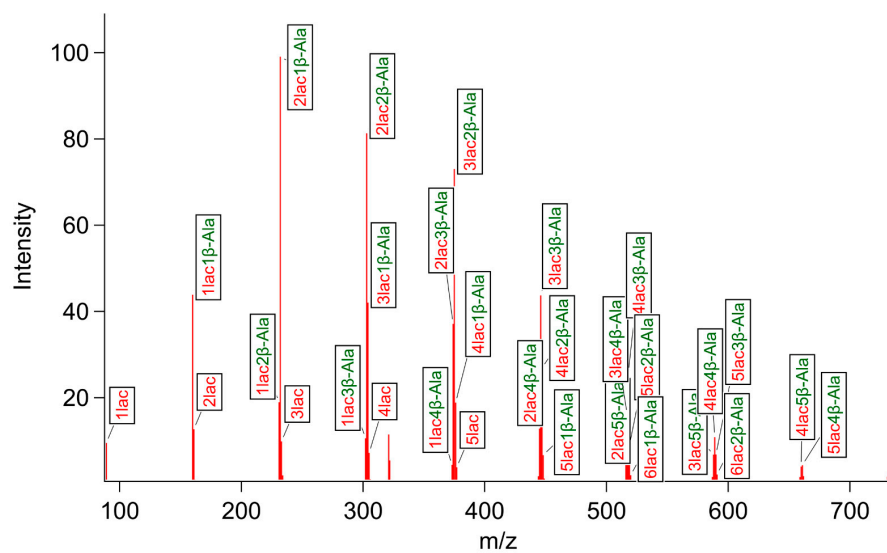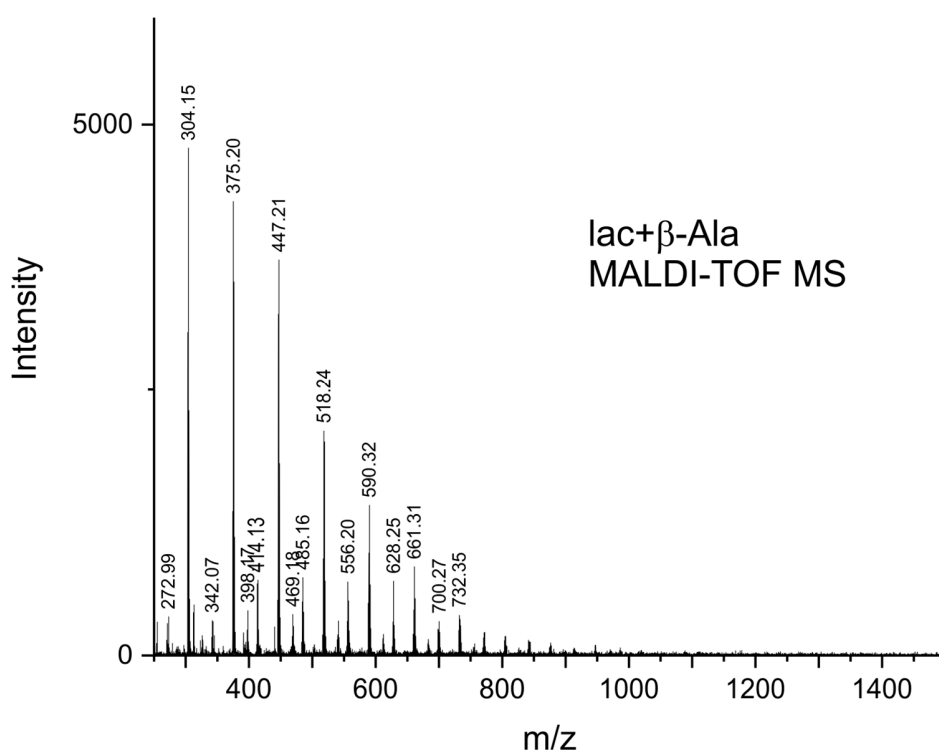

**Figure S7.** MS of a single-step dry-down reaction of lactic acid (lac) and beta-alanine (β-Ala) supports the formation of depsipeptides. lac and β-Ala were dried at 85 °C for seven days and the resulting depsipeptides were analyzed by negative-mode ESI-MS and



MALDI-TOF MS, indicating a variety of depsipeptides. **lac** is labeled in red;  **$\beta$ -Aba** is labeled in green. All labeled species correspond to  $[M-H]^-$  ions.

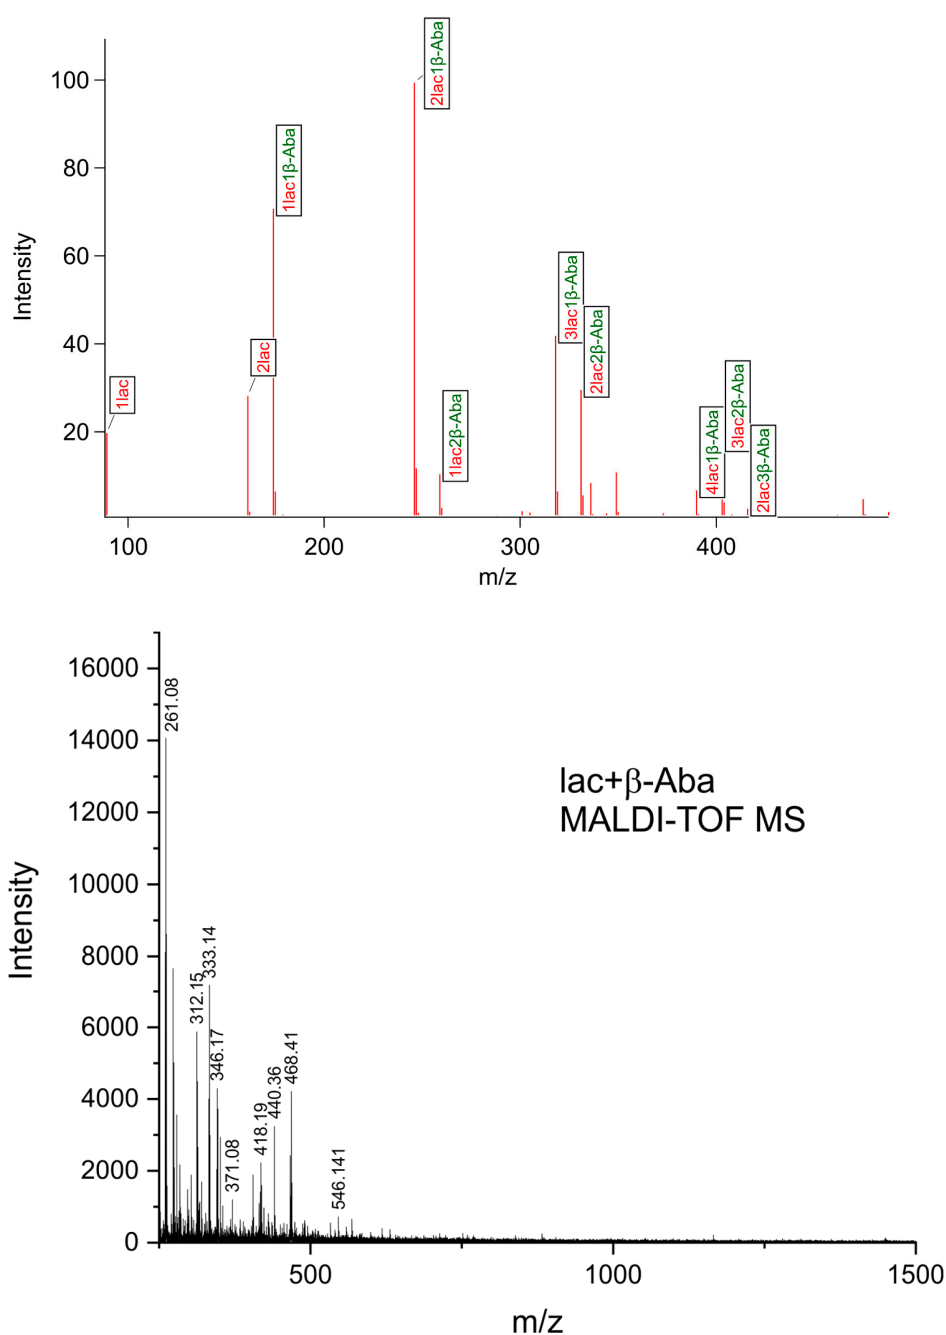

Figure S8. MS of a single-step dry-down reaction of lactic acid (lac) and beta-aminobutyric acid ( $\beta$ -Aba) supports the formation of depsipeptides. lac and  $\beta$ -Aba

were dried at 85 °C for seven days and the resulting depsipeptides were analyzed by negative-mode ESI-MS and MALDI-TOF MS, indicating a variety of depsipeptides. **lac** is labeled in red;  $\beta$ -**Aba** is labeled in green. All labeled species correspond to  $[M-H]^-$  ions.

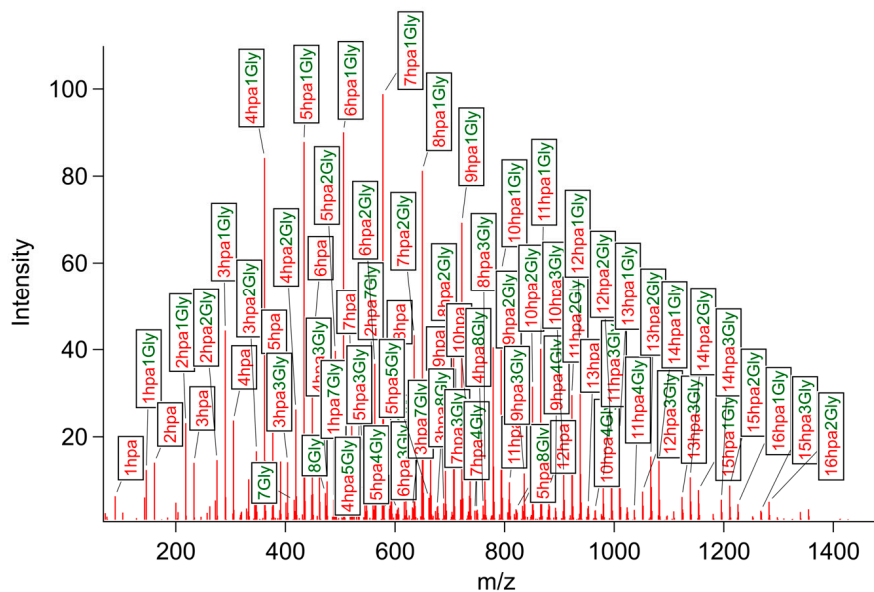

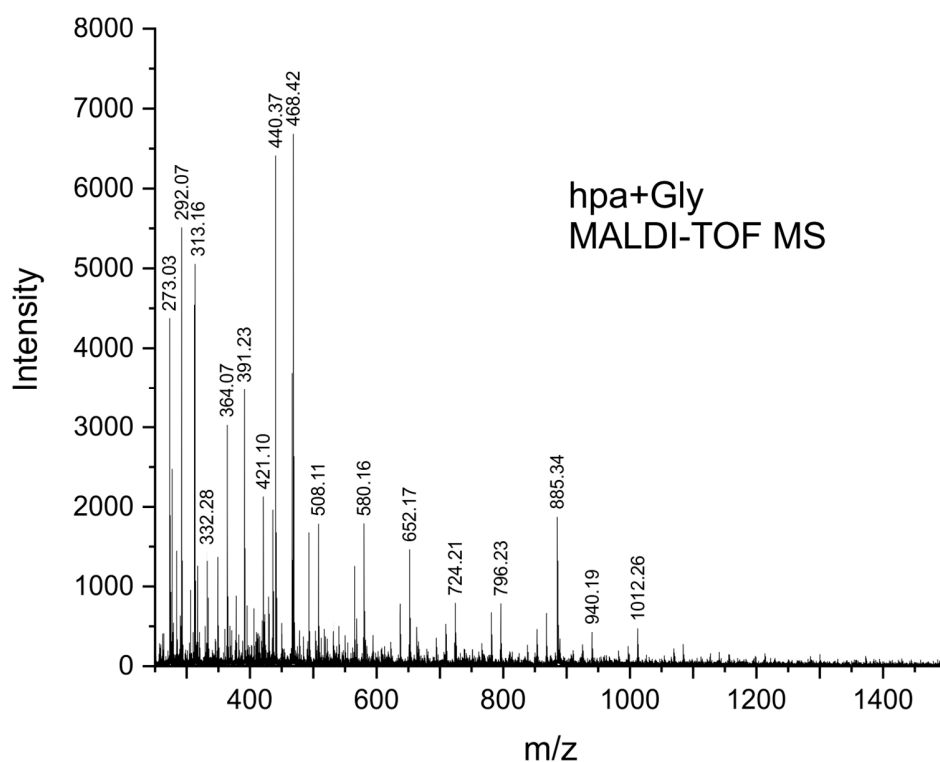

**Figure S9. MS of a single-step dry-down reaction of 3-hydroxypropanoic acid (hpa) and glycine (Gly) supports the formation of depsipeptides.** hpa and Gly were dried at 85 °C for seven days and the resulting depsipeptides were analyzed by negative-mode ESI-MS and MALDI-TOF MS, indicating a variety of depsipeptides. **hpa** is labeled in red; **Gly** is labeled in green. All labeled species correspond to  $[M-H]^-$  ions.

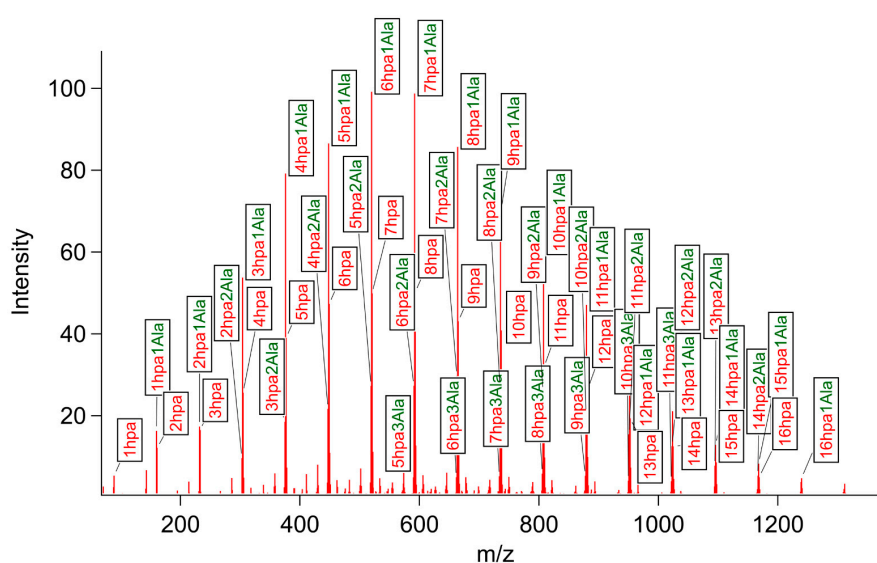

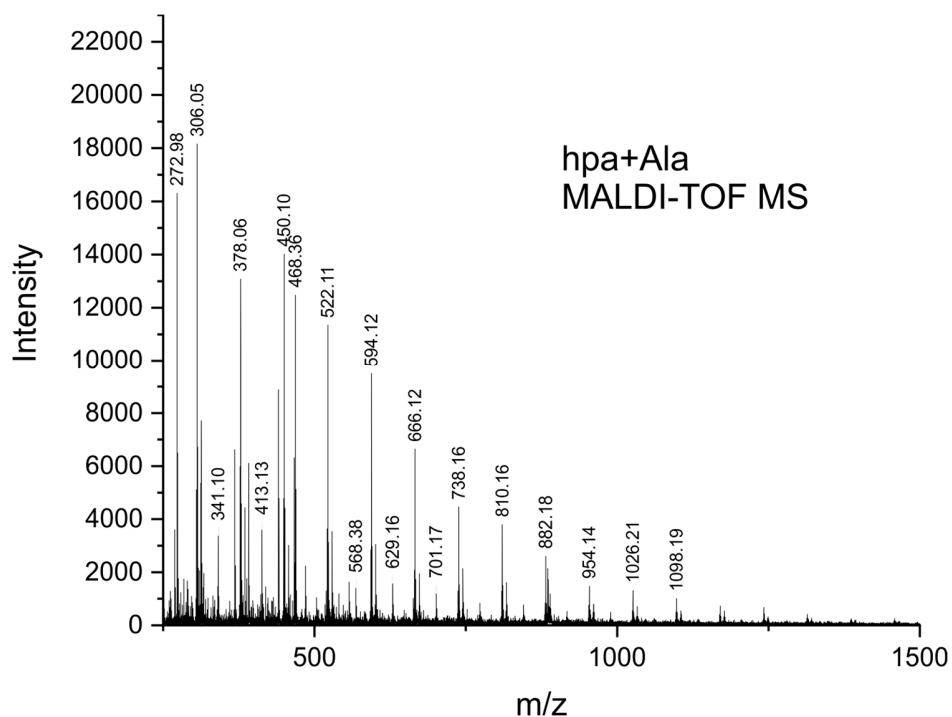

**Figure S10. MS of a single-step dry-down reaction of 3-hydroxypropanoic acid (hpa) and alanine (Ala) supports the formation of depsipeptides.** hpa and Ala were dried at 85 °C for seven days and the resulting depsipeptides were analyzed by negative-mode ESI-MS and MALDI-TOF MS, indicating a variety of depsipeptides. **hpa** is labeled in red; **Ala** is labeled in green. All labeled species correspond to [M-H]<sup>-</sup> ions.

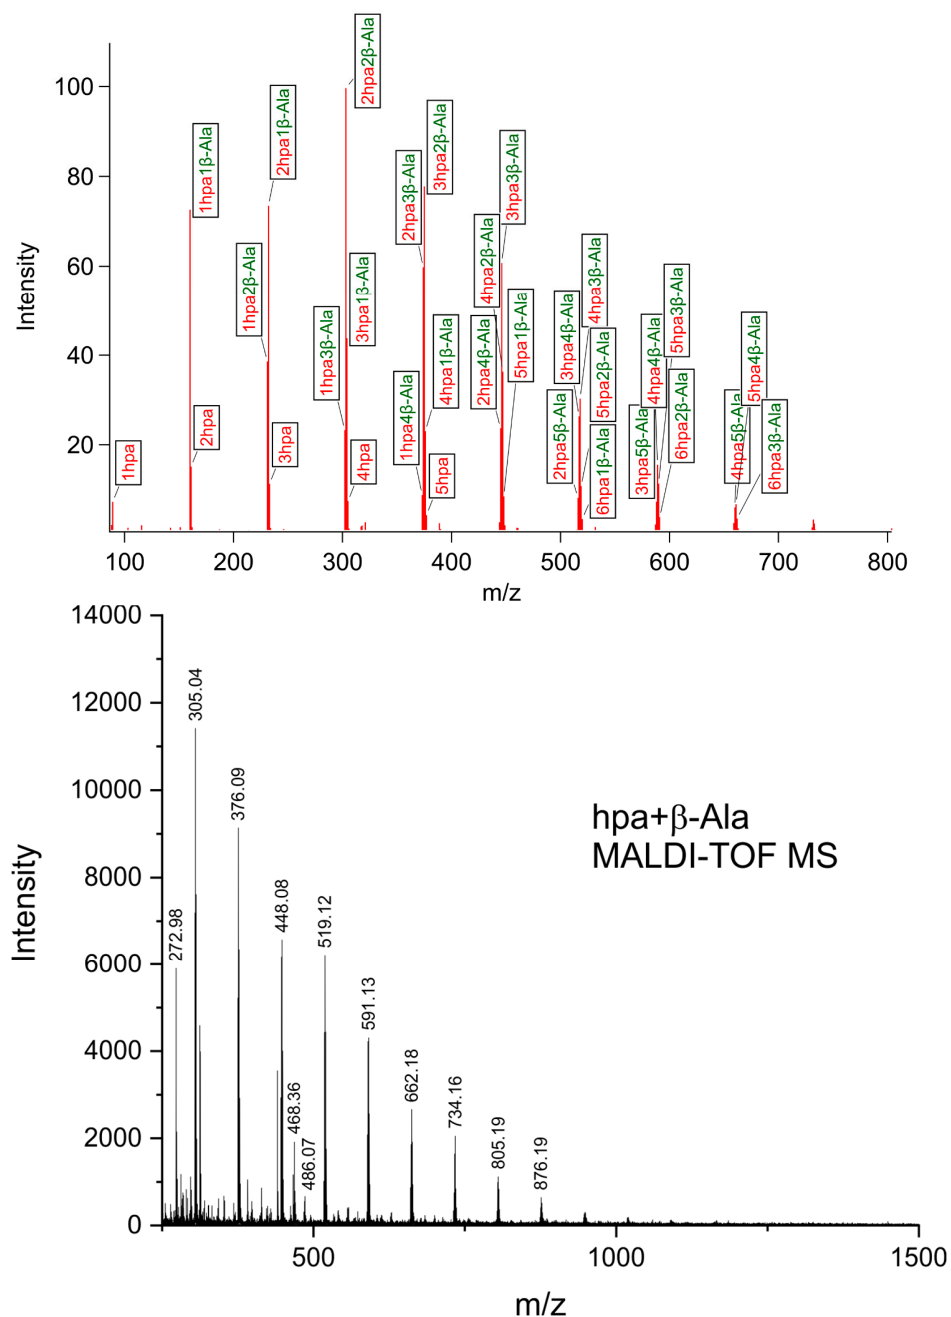

**Figure S11.** MS of a single-step dry-down reaction of 3-hydroxypropanoic acid (hpa) and beta-alanine ( $\beta$ -Ala) supports the formation of depsipeptides. hpa and  $\beta$ -Ala were dried at 85 °C for seven days and the resulting depsipeptides were analyzed by negative-mode ESI-MS and MALDI-TOF MS, indicating a variety of depsipeptides. **hpa** is labeled in red;  **$\beta$ -Ala** is labeled in green. All labeled species correspond to  $[M-H]^-$  ions.

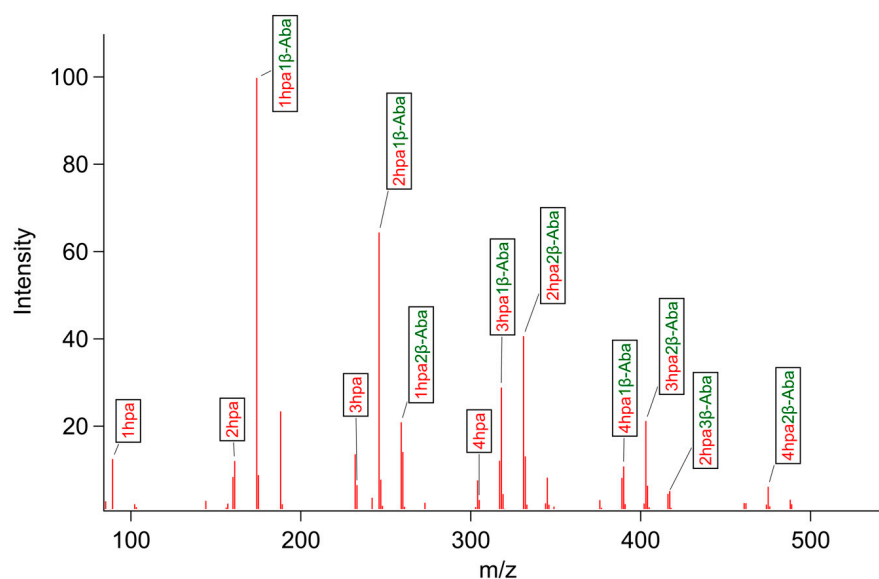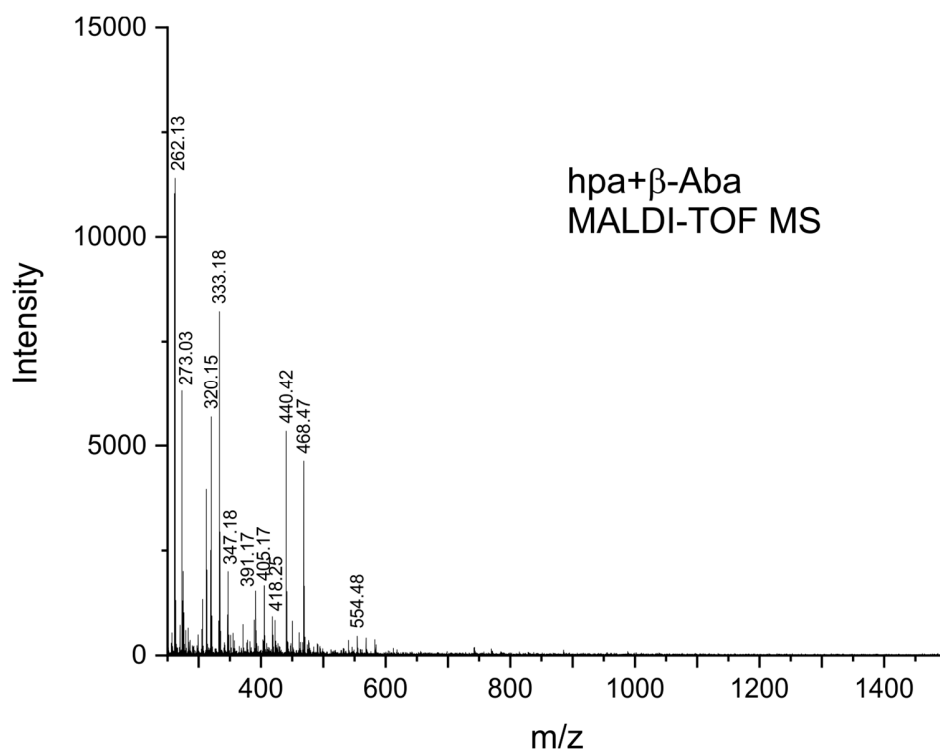

**Figure S12.** MS of a single-step dry-down reaction of 3-hydroxypropanoic acid (**hpa**) and beta-aminobutyric acid ( **$\beta$ -Aba**) supports the formation of depsipeptides. **hpa** and  **$\beta$ -Aba** were dried at 85 °C for seven days and the resulting depsipeptides were analyzed by negative-mode ESI-MS and MALDI-TOF MS, indicating a variety of depsipeptides. **hpa** is labeled in red;  **$\beta$ -Aba** is labeled in green. All labeled species correspond to  $[M-H]^-$  ions.

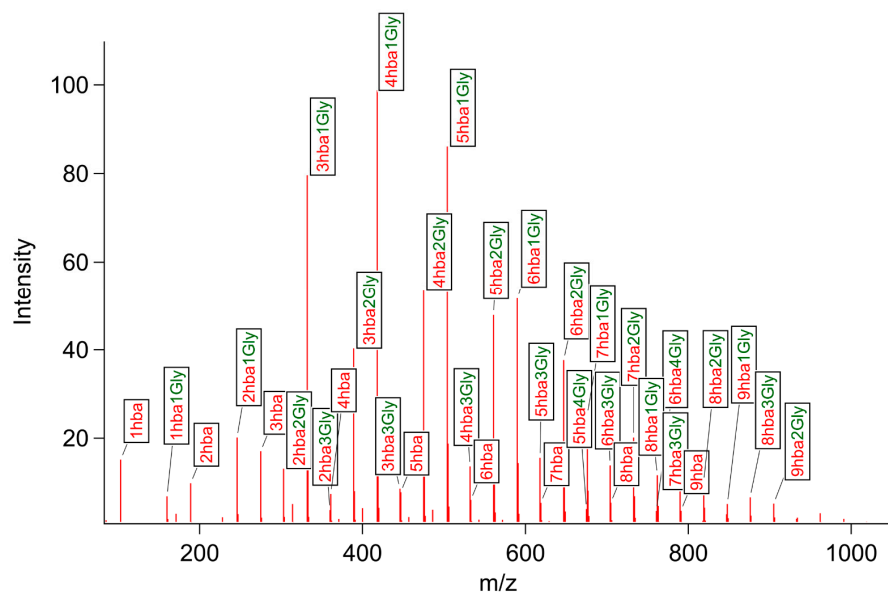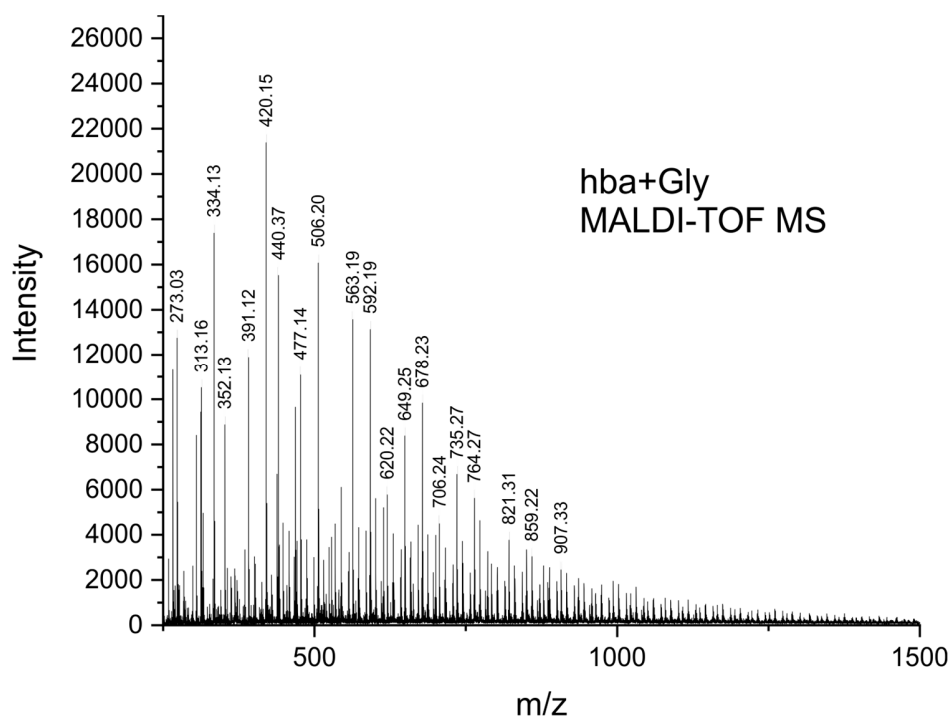

**Figure S13. MS of a single-step dry-down reaction of 3-hydroxybutanoic acid (hba) and glycine (Gly) supports the formation of depsipeptides. hba and Gly were dried at 85 °C for seven days and the resulting depsipeptides were analyzed by negative-mode ESI-MS**

and MALDI-TOF MS, indicating a variety of depsipeptides. **hba** is labeled in red; **Gly** is labeled in green. All labeled species correspond to  $[M-H]^-$  ions.

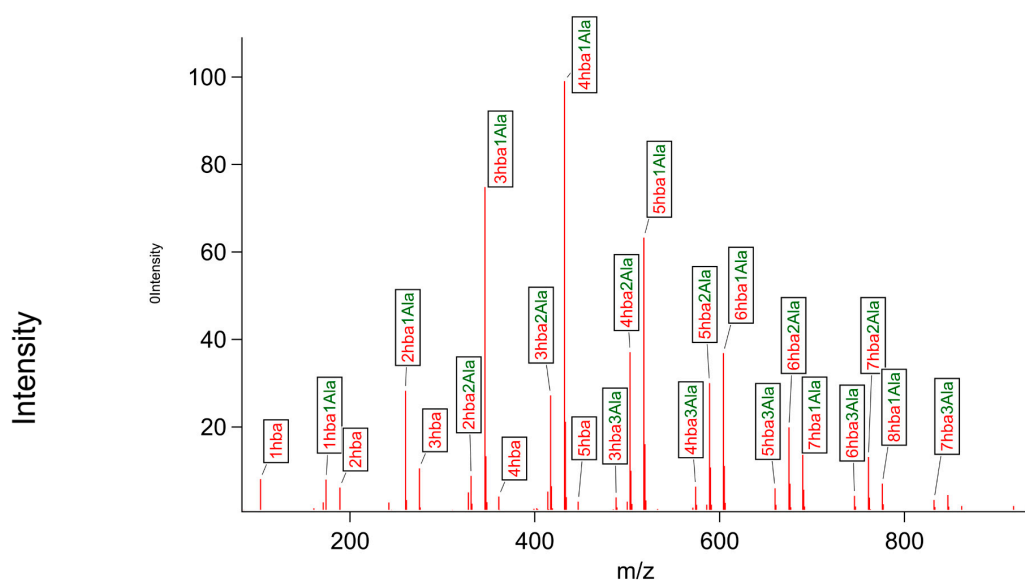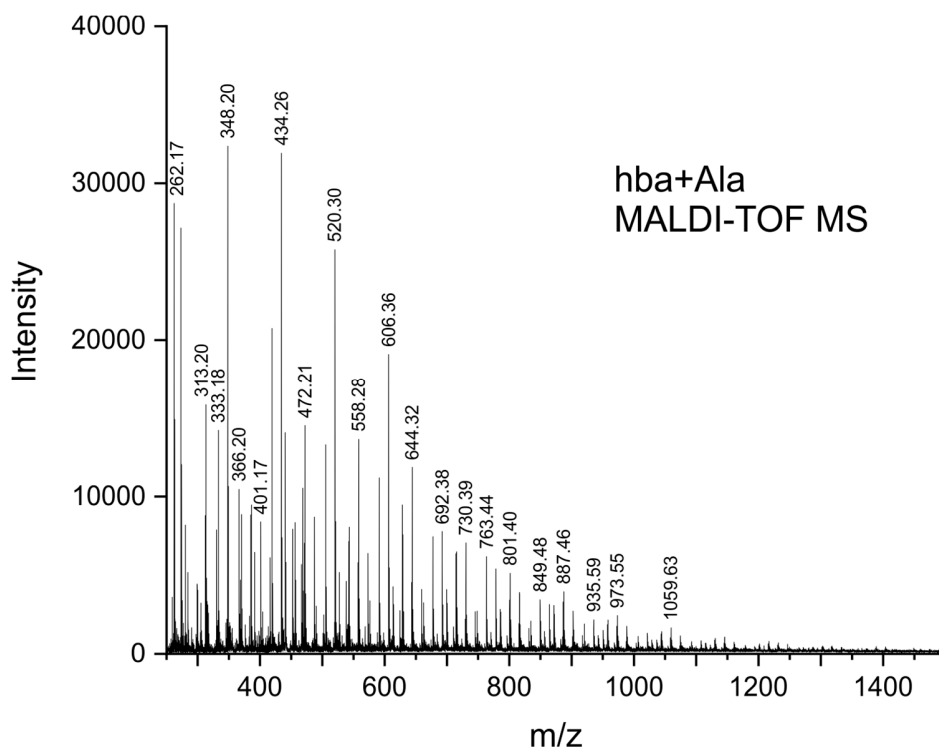

**Figure S14. MS of a single-step dry-down reaction of 3-hydroxybutanoic acid (hba) and alanine (Ala) supports the formation of depsipeptides. hba and Ala were dried at 85 °C**



for seven days and the resulting depsipeptides were analyzed by negative-mode ESI-MS and MALDI-TOF MS, indicating a variety of depsipeptides. **hba** is labeled in red; **Ala** is labeled in green. All labeled species correspond to  $[M-H]^-$  ions.

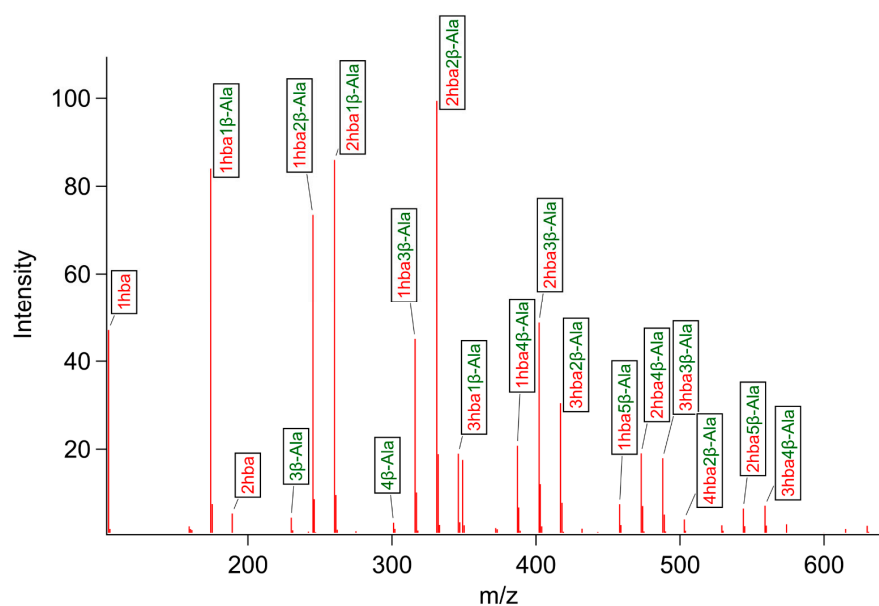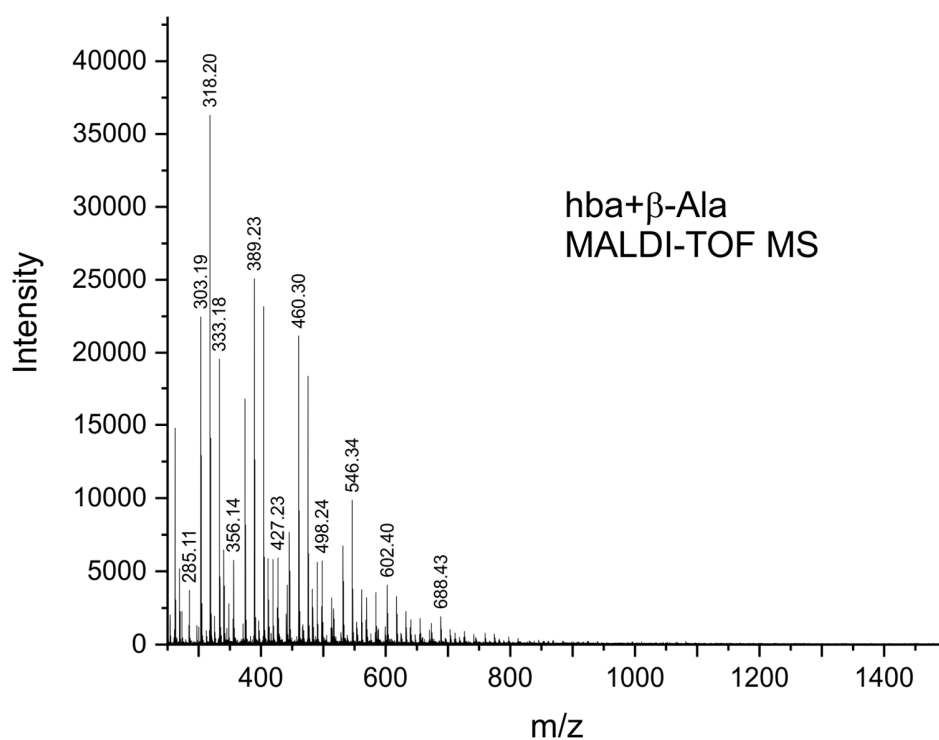

**Figure S15. MS of a single-step dry-down reaction of 3-hydroxybutanoic acid (hba) and beta-alanine ( $\beta$ -Ala) supports the formation of depsipeptides. hba and  $\beta$ -Ala were dried at 85 °C for seven days and the resulting depsipeptides were analyzed by negative-mode ESI-MS and MALDI-TOF MS, indicating a variety of depsipeptides. **hba** is labeled in red;  $\beta$ -Ala is labeled in green. All labeled species correspond to  $[M-H]^-$  ions.**

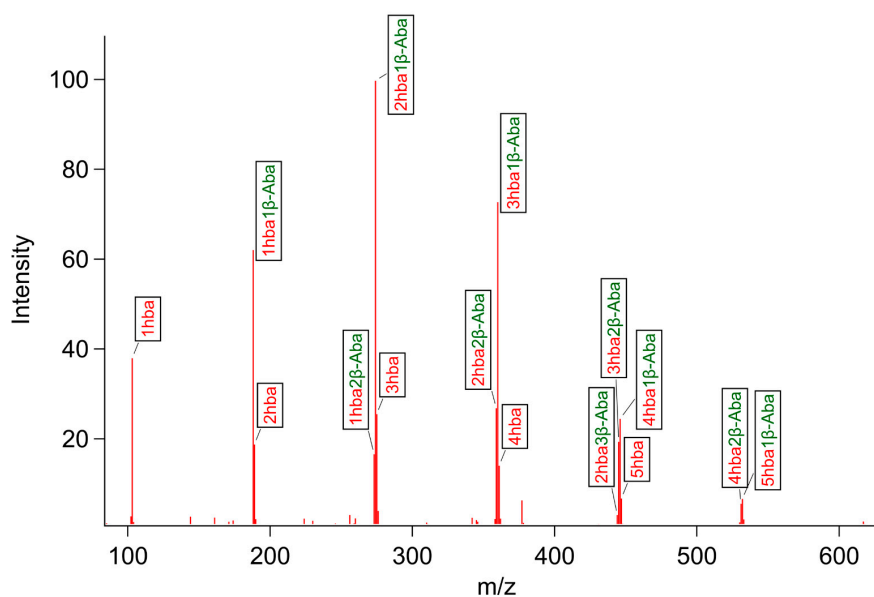

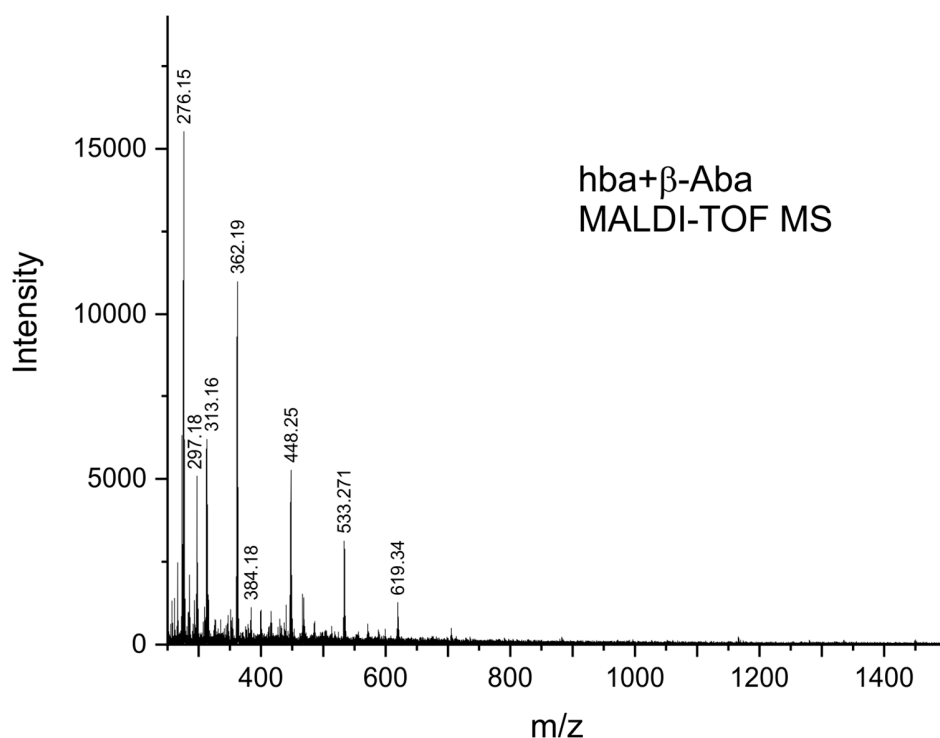

**Figure S16.** MS of a single-step dry-down reaction of 3-hydroxybutanoic acid (hba) and beta-aminobutyric acid ( $\beta$ -Aba) supports the formation of depsipeptides. hba and  $\beta$ -Aba were dried at 85 °C for seven days and the resulting depsipeptides were analyzed by negative-mode ESI-MS and MALDI-TOF MS, indicating a variety of depsipeptides. **hba** is labeled in red;  $\beta$ -Aba is labeled in green. All labeled species correspond to  $[M-H]^-$  ions.

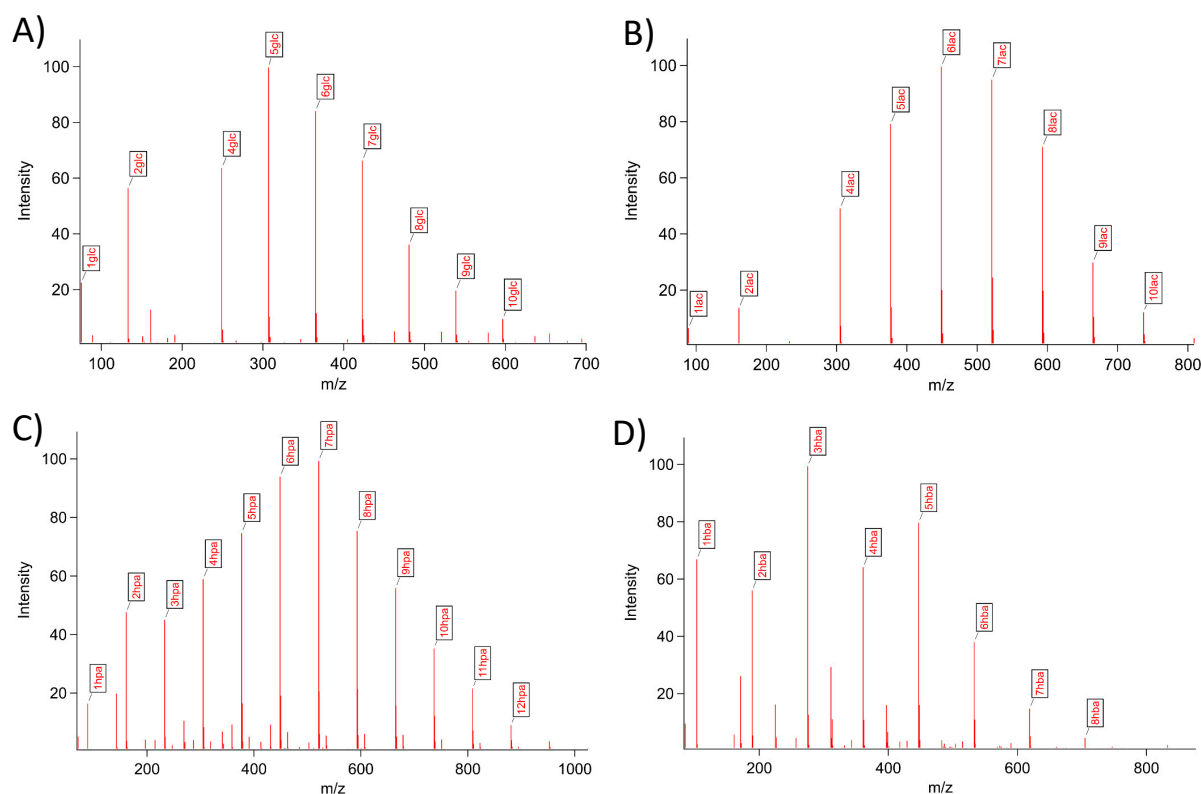

**Figure S17. ESI-MS analysis of control single-step dry-down reactions of the hydroxy acids in the absence of amino acids.** glycolic acid (glc, A), lactic acid (lac, B), 3-hydroxypropionic acid (hpa, C), and 3-hydroxybutanoic acid (hba, D) were dried at 85°C for seven days and the resulting products were analyzed by negative-mode ESI-MS. MS analysis indicates the formation of a variety of polyesters. All labeled species correspond to  $[M-H]^-$  ions.

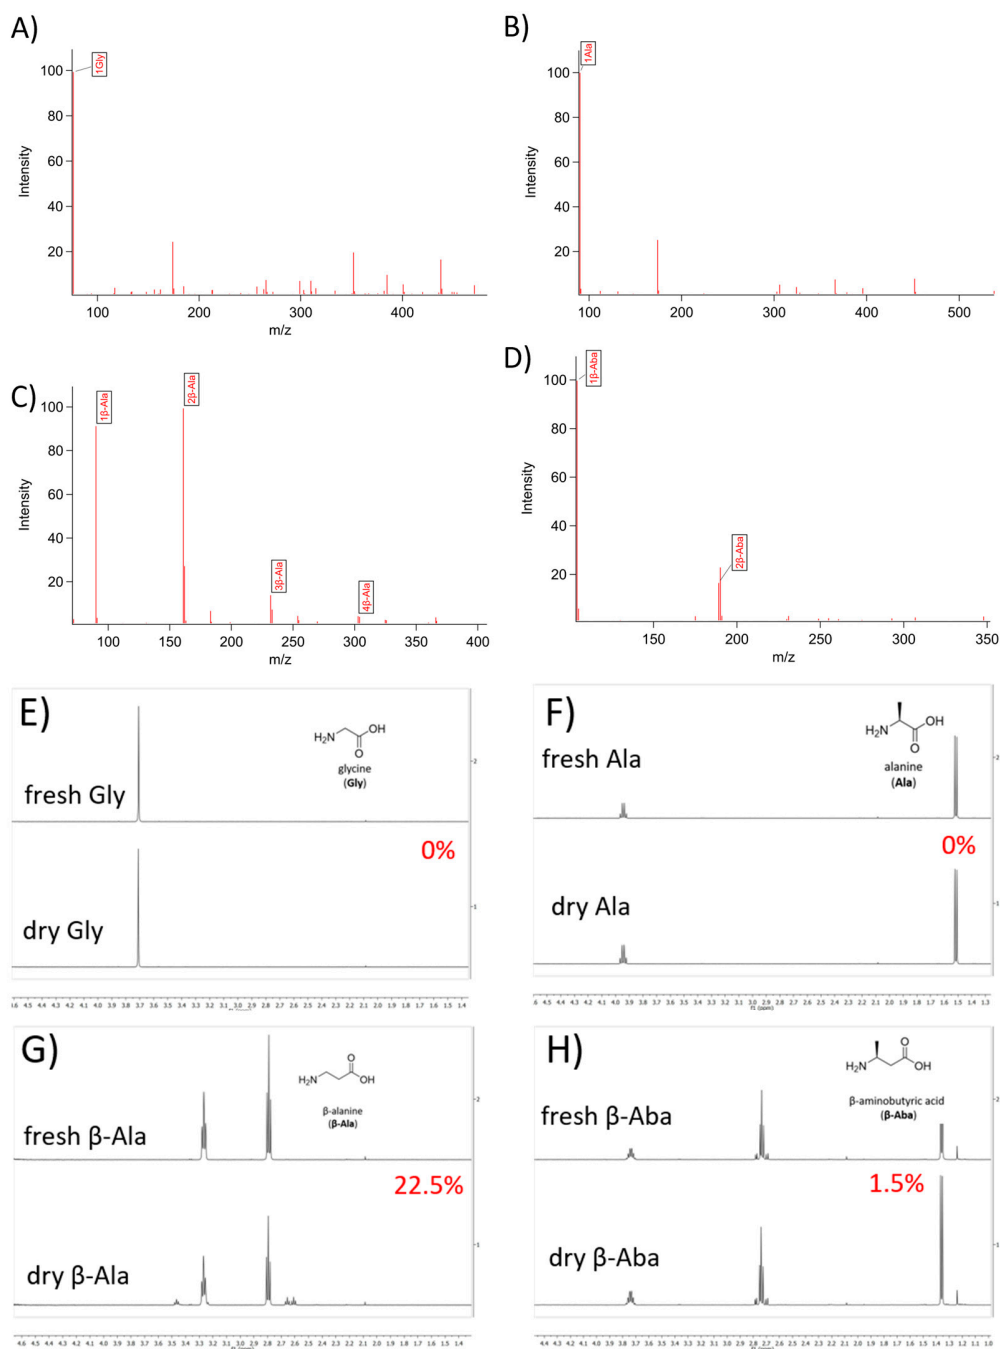

**Figure S18. Analysis of control single-step dry-down reactions of the amino acids in the absence of hydroxy acids.** Glycine (Gly, A), Alanine (Ala, B),  $\beta$ -alanine ( $\beta$ -Ala, C), and  $\beta$ -aminobutyric acid ( $\beta$ -Aba, D) were dried at 85°C for seven days and the resulting products were analyzed by positive-mode ESI-MS (A-D). Labeled species correspond to  $[\text{M}+\text{H}]^+$  ions. Short peptides were evident for beta amino acids single-step dry-down reactions, but no peptides were formed for the respective alpha amino acids controls that were subjected to the same reaction conditions. Similarly, individual amino acids were

dried at 85°C for seven days under acidified conditions (pH~3) and the resulting products were analyzed by  $^1\text{H}$  NMR (E-H). Percent conversion is indicated in each panel.

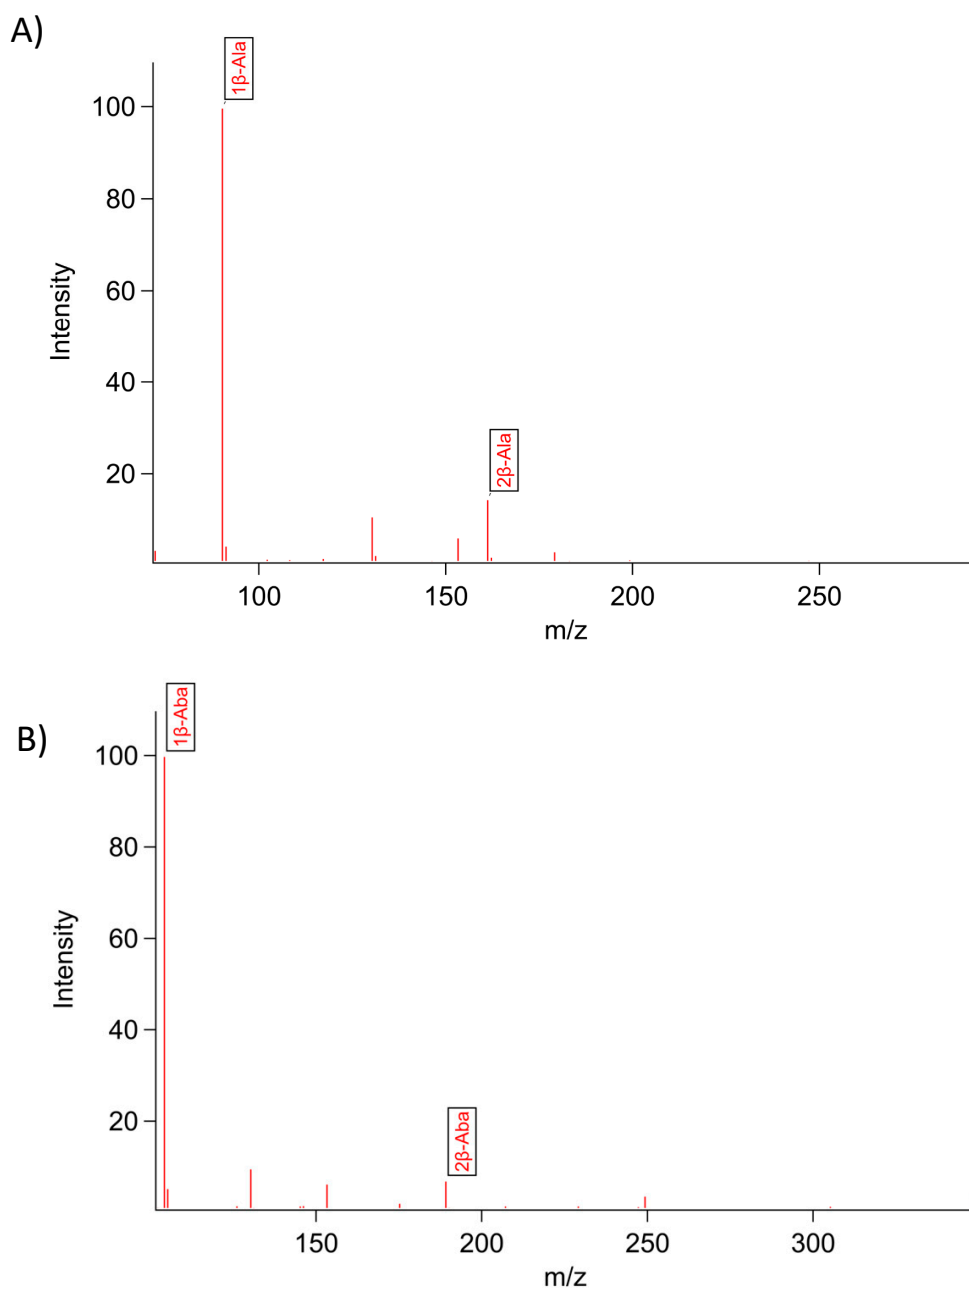

**Figure S19.** ESI-MS analysis of stock solutions of  $\beta$ -amino acids before single-step dry-down reactions shows the existence of some peptide dimers are present prior to reaction.  $\beta$ -alanine ( $\beta$ -Ala, A) and  $\beta$ -aminobutyric acid ( $\beta$ -Aba, B) stock solutions were analyzed by positive-mode ESI-MS.

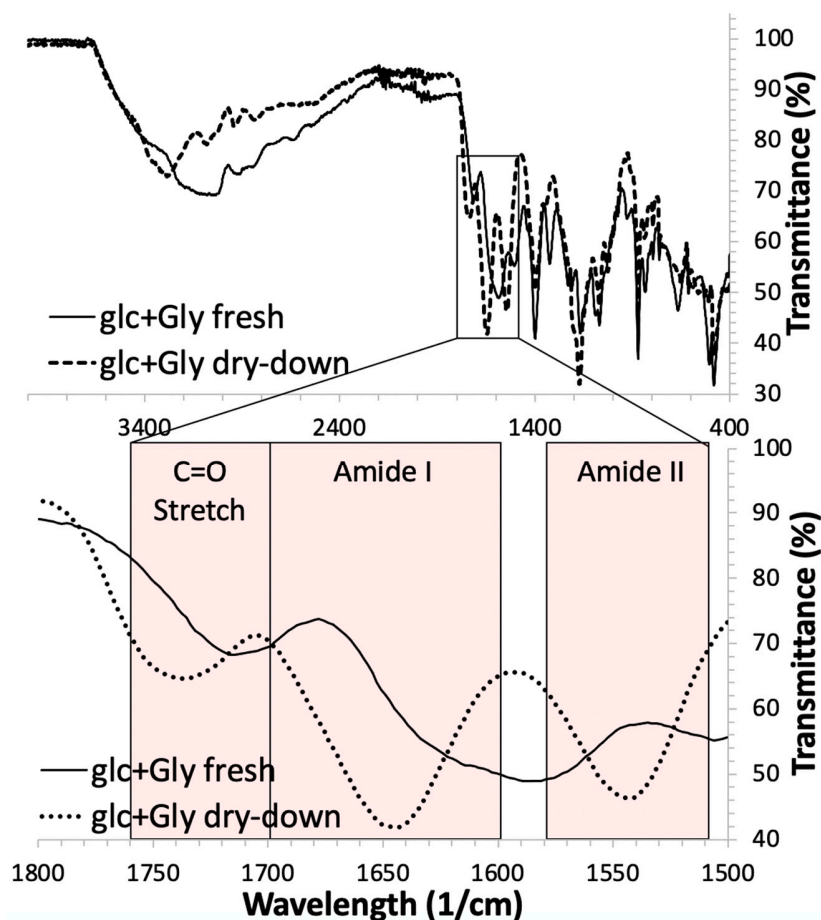

**Figure S20. FTIR spectra changes upon single-step dry-down reactions of glycolic acid (glc) and glycine (Gly) support the formation of depsipeptides.** glc and Gly were dried at 85 °C for seven days and the resulting depsipeptides were analyzed by FTIR and compared to unreacted stock solutions. The FTIR of the single-step dry-down reactions shows that the C=O stretch has shifted from  $\sim 1720$  to  $1740\text{ cm}^{-1}$ , consistent with conversion of a free carboxylic acid to an ester, and shifts are also evident in the amide I ( $1600\text{ cm}^{-1}$ - $1700\text{ cm}^{-1}$ ) and amide II ( $1510\text{ cm}^{-1}$ - $1580\text{ cm}^{-1}$ ) regions.

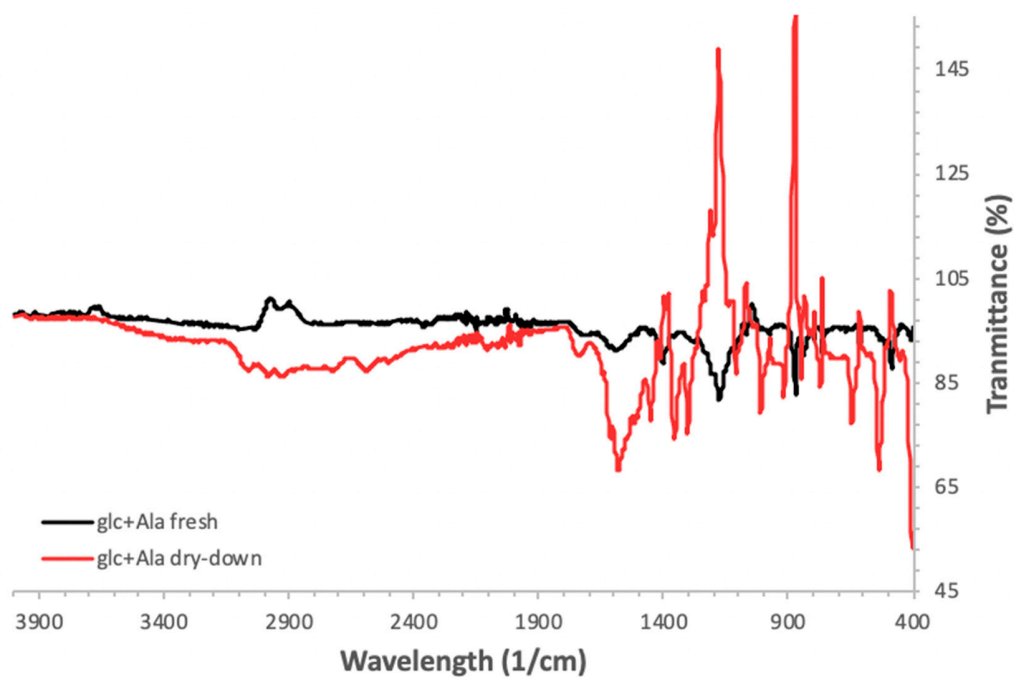

**Figure S21. FTIR spectra changes upon single-step dry-down reactions of glycolic acid (glc) and alanine (Ala) support the formation of depsipeptides. glc and Ala were dried at 85 °C for seven days and the resulting depsipeptides were analyzed by FTIR and compared to unreacted stock solutions.**



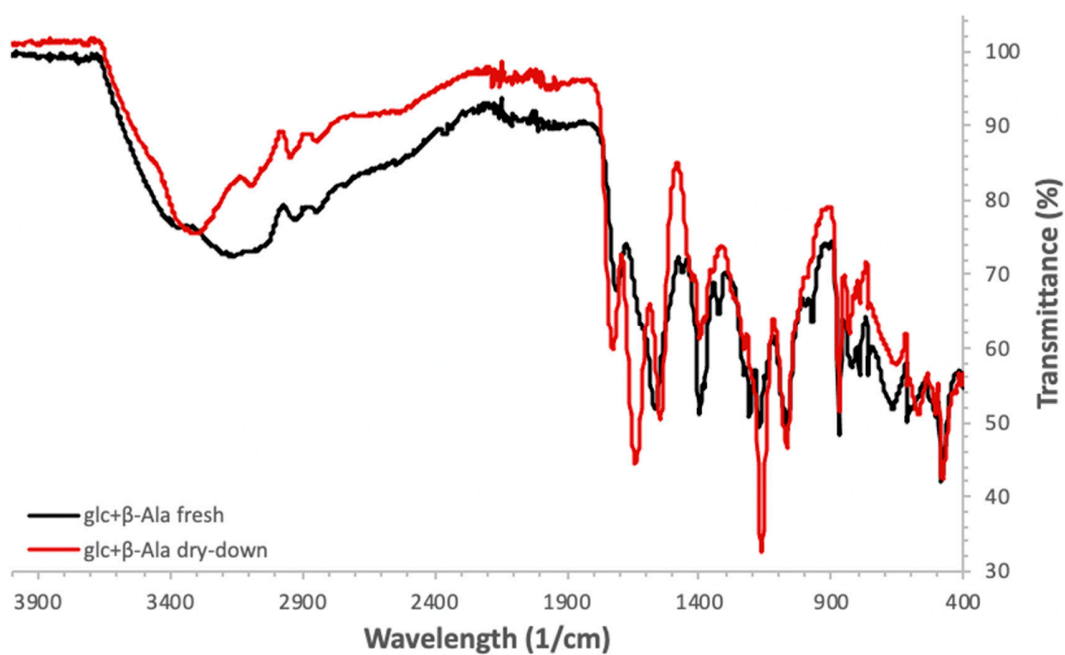

**Figure S22. FTIR spectra changes upon single-step dry-down reactions of glycolic acid (glc) and beta-alanine ( $\beta$ -Ala) support the formation of depsipeptides. glc and  $\beta$ -Ala were dried at 85 °C for seven days and the resulting depsipeptides were analyzed by FTIR and compared to unreacted stock solutions.**

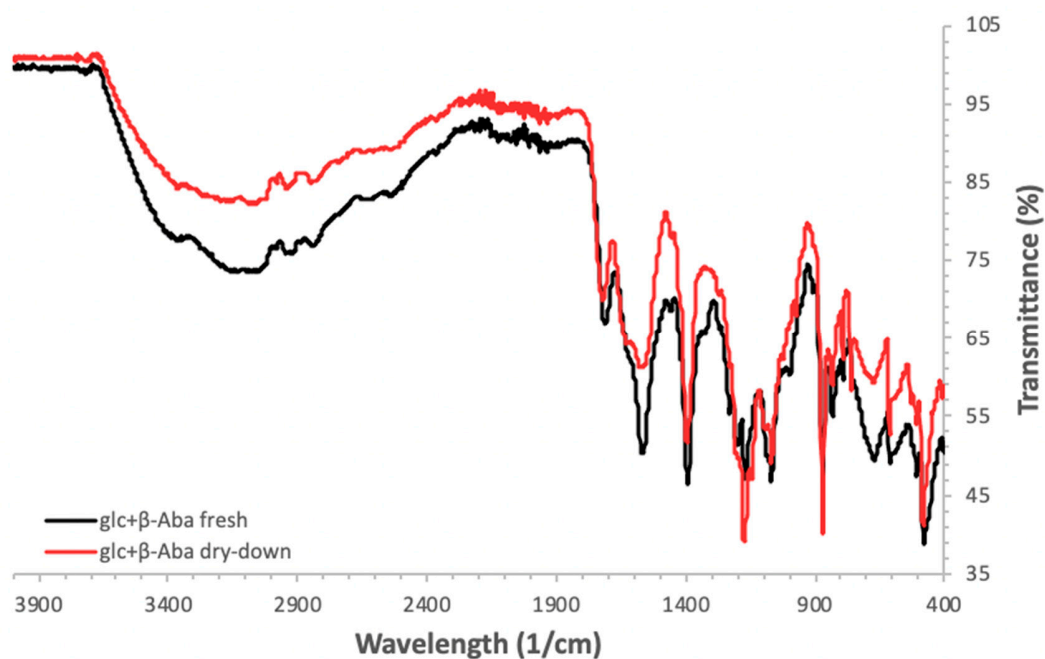

**Figure S23. FTIR spectra changes upon single-step dry-down reactions of glycolic acid (glc) and beta-aminobutyric acid ( $\beta$ -Aba) support the formation of depsipeptides. glc and  $\beta$ -Aba were dried at 85 °C for seven days and the resulting depsipeptides were analyzed by FTIR and compared to unreacted stock solutions.**

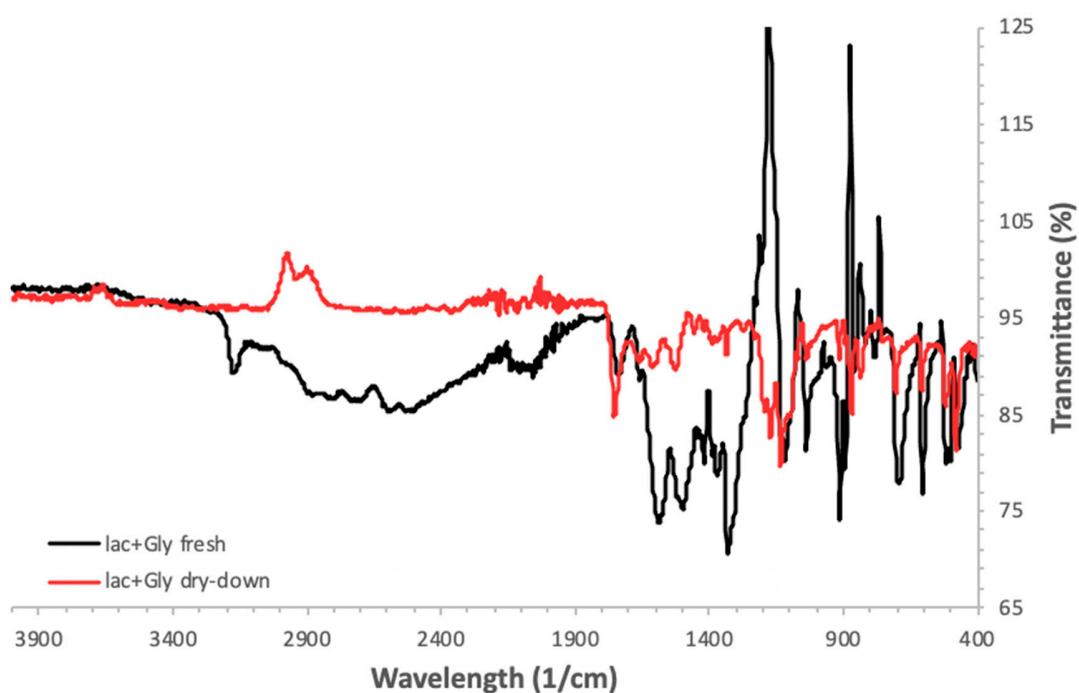

**Figure S24. FTIR spectra changes upon single-step dry-down reactions of lactic acid (lac) and glycine (Gly) support the formation of depsipeptides.** lac and Gly were dried at 85 °C for seven days and the resulting depsipeptides were analyzed by FTIR and compared to unreacted stock solutions.

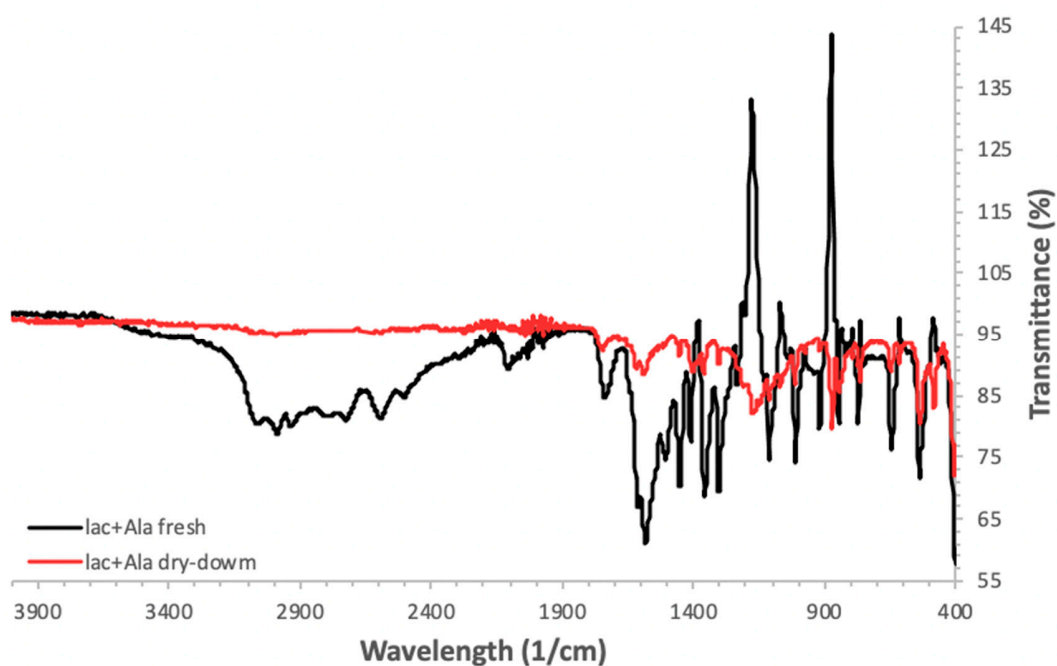

**Figure S25. FTIR spectra changes upon single-step dry-down reactions of lactic acid (lac) and alanine (Ala) support the formation of depsipeptides.** lac and Ala were dried at 85 °C for seven days and the resulting depsipeptides were analyzed by FTIR and compared to unreacted stock solutions.

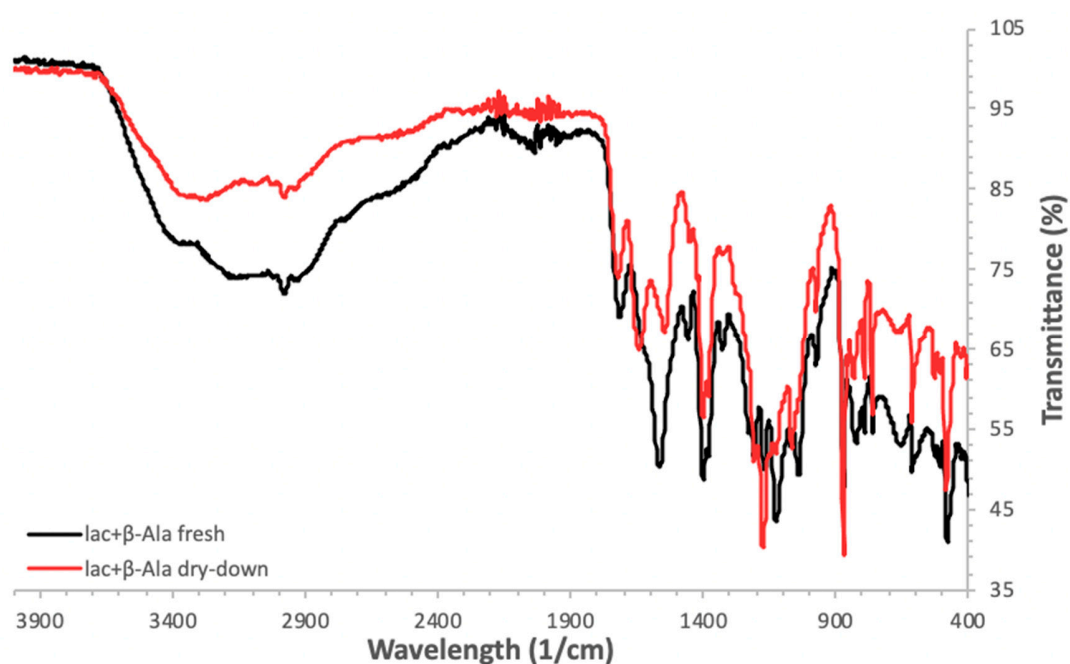

**Figure S26. FTIR spectra changes upon single-step dry-down reactions of lactic acid (lac) and beta-alanine ( $\beta$ -Ala) support the formation of depsipeptides. lac and  $\beta$ -Ala were dried at 85 °C for seven days and the resulting depsipeptides were analyzed by FTIR and compared to unreacted stock solutions.**

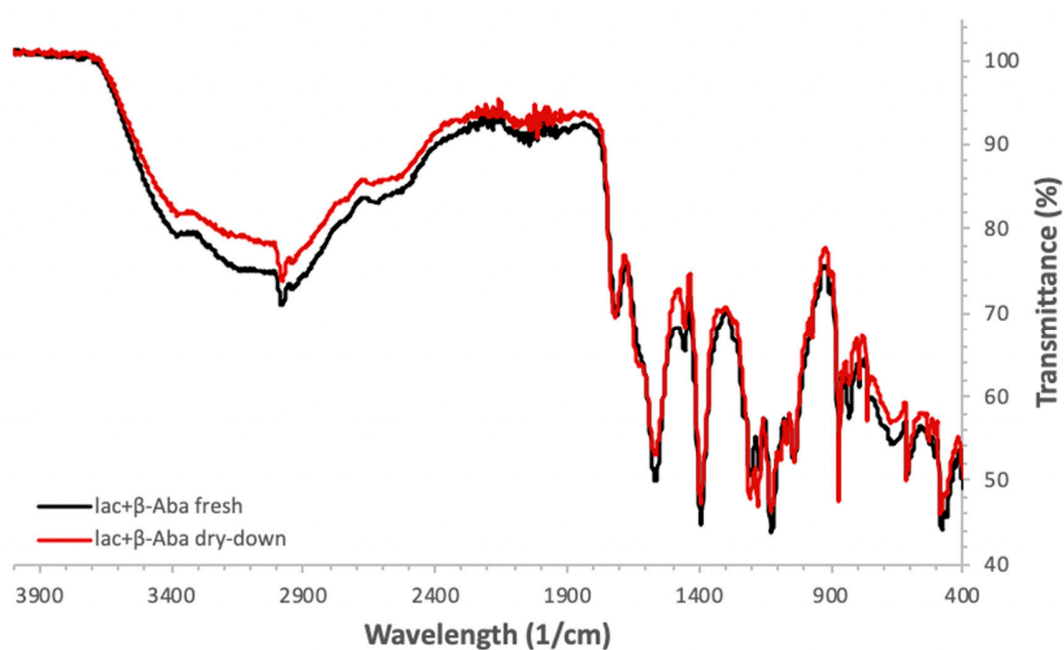

**Figure S27. FTIR spectra changes upon single-step dry-down reactions of lactic acid (lac) and beta-aminobutyric acid ( $\beta$ -Aba) support the formation of depsipeptides. lac and  $\beta$ -Aba were dried at 85 °C for seven days and the resulting depsipeptides were analyzed by FTIR and compared to unreacted stock solutions.**

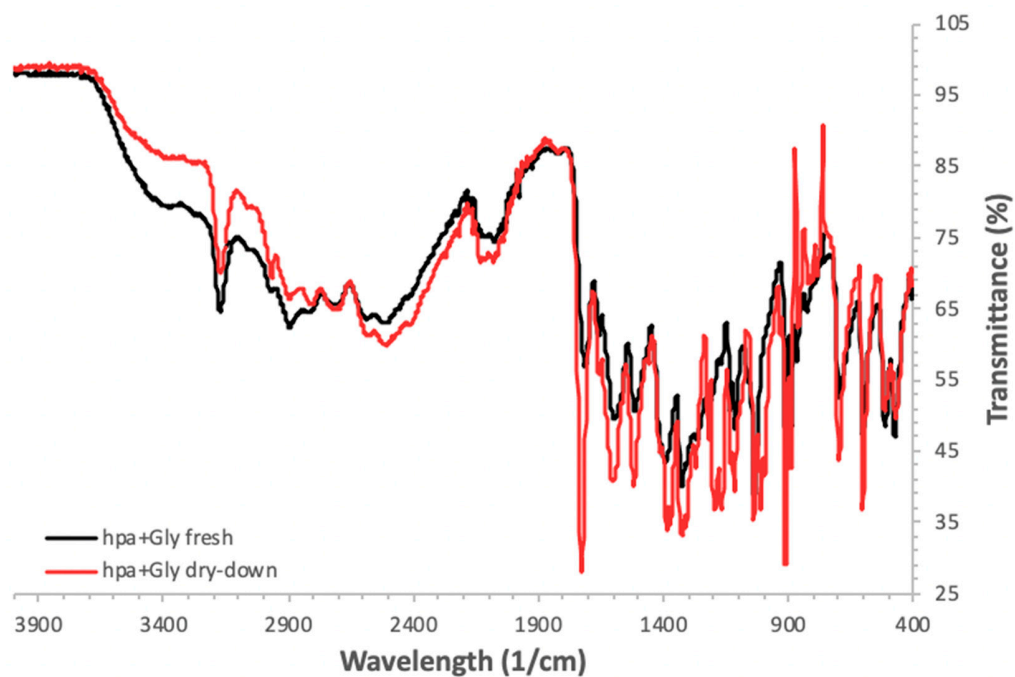

**Figure S28. FTIR spectra changes upon single-step dry-down reactions of 3-hydroxypropanoic acid (hpa) and glycine (Gly) support the formation of depsipeptides. hpa and Gly were dried at 85 °C for seven days and the resulting depsipeptides were analyzed by FTIR and compared to unreacted stock solutions.**

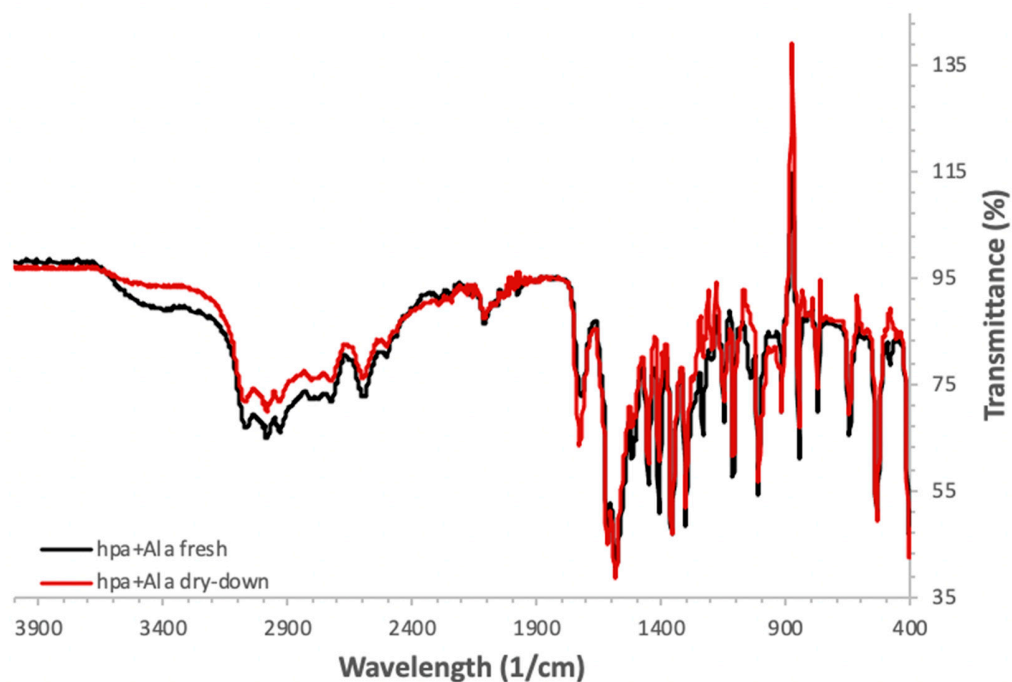

**Figure S29.** FTIR spectra changes upon single-step dry-down reactions of 3-hydroxypropanoic acid (hpa) and alanine (Ala) support the formation of depsipeptides. hpa and Ala were dried at 85 °C for seven days and the resulting depsipeptides were analyzed by FTIR and compared to unreacted stock solutions.



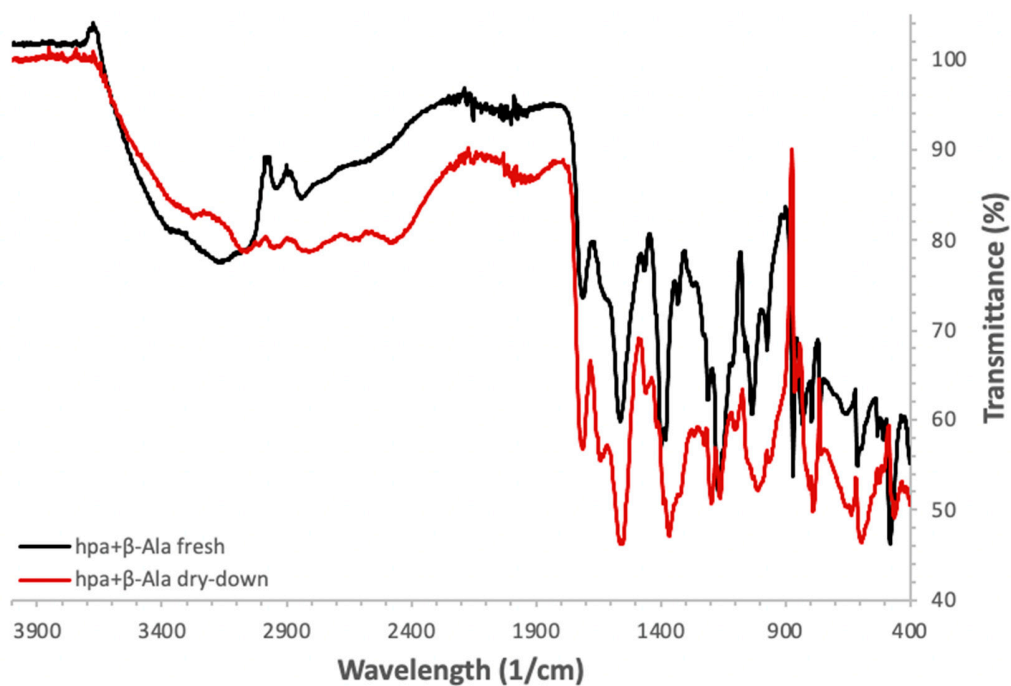

**Figure 30. FTIR spectra changes upon single-step dry-down reactions of 3-hydroxypropanoic acid (hpa) and beta-alanine ( $\beta$ -Ala) support the formation of depsipeptides. hpa and  $\beta$ -Ala were dried at 85 °C for seven days and the resulting depsipeptides were analyzed by FTIR and compared to unreacted stock solutions.**

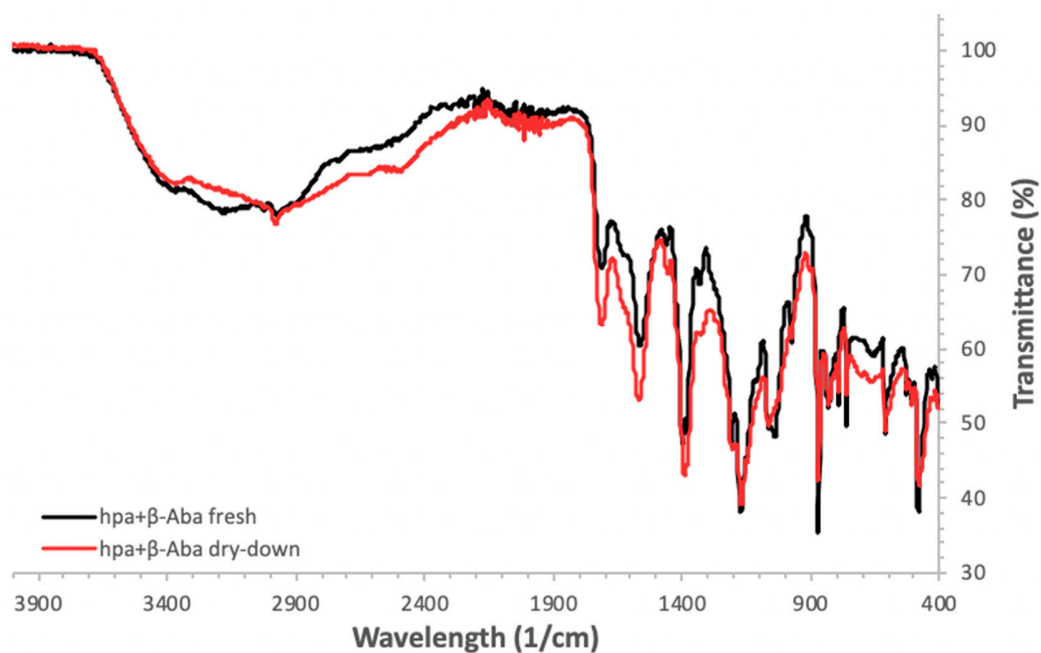

**Figure S31. FTIR spectra changes upon single-step dry-down reactions of 3-hydroxypropanoic acid (hpa) and beta-aminobutyric acid ( $\beta$ -Aba) support the formation of depsipeptides. hpa and  $\beta$ -Aba were dried at 85 °C for seven days and the resulting depsipeptides were analyzed by FTIR and compared to unreacted stock solutions.**

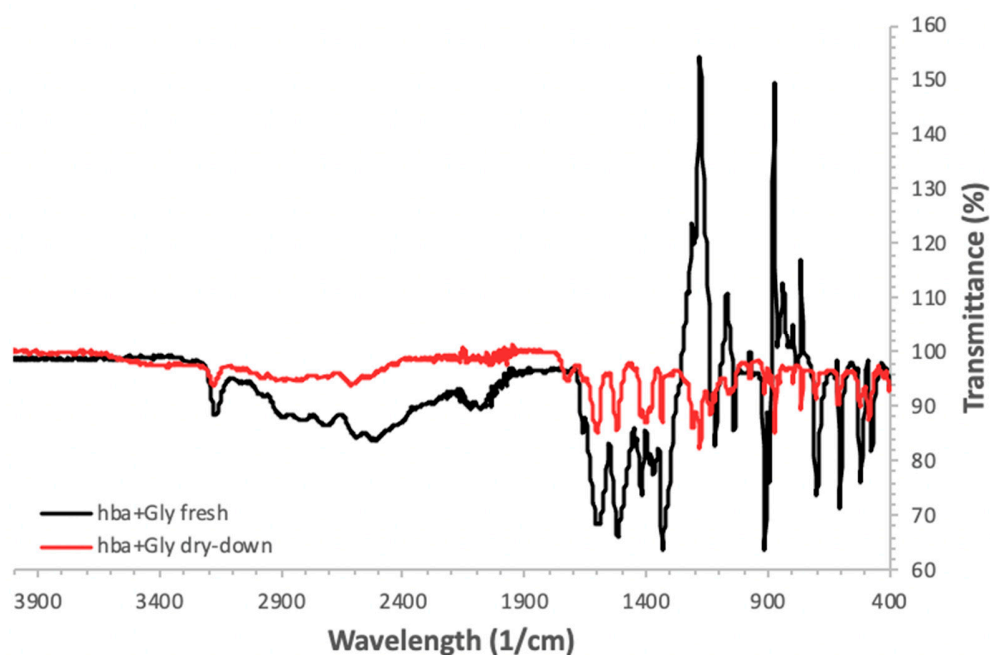

**Figure S32. FTIR spectra changes upon single-step dry-down reactions of 3-hydroxybutanoic acid (hba) and glycine (Gly) support the formation of depsipeptides. hba and Gly were dried at 85 °C for seven days and the resulting depsipeptides were analyzed by FTIR and compared to unreacted stock solutions.**

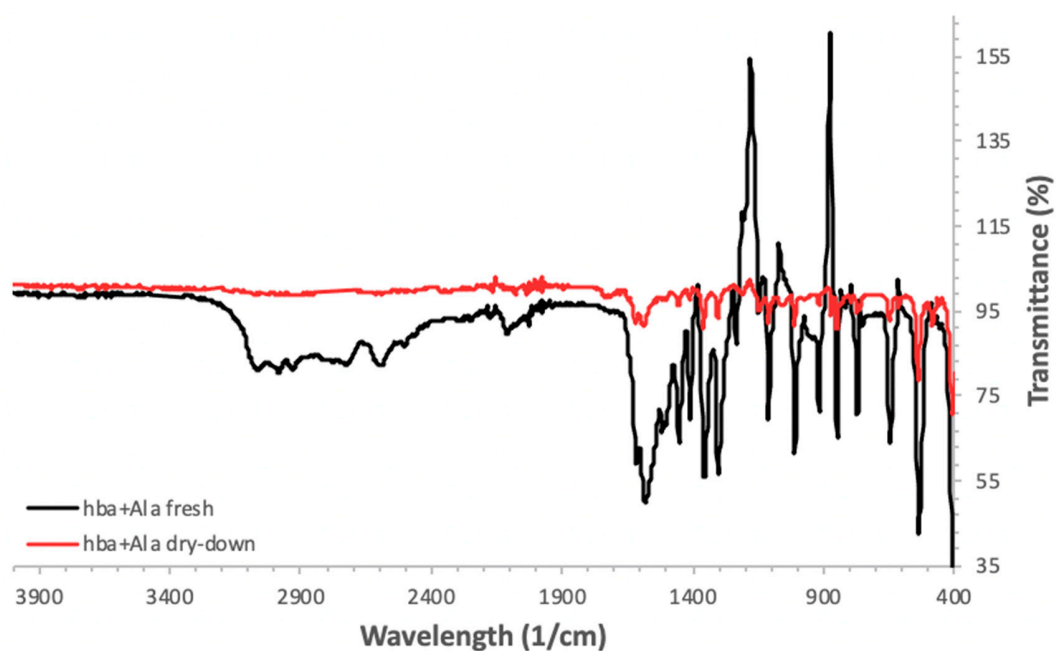

**Figure S33. FTIR spectra changes upon single-step dry-down reactions of 3-hydroxybutanoic acid (hba) and alanine (Ala) support the formation of depsipeptides. *hba* and *Ala* were dried at 85 °C for seven days and the resulting depsipeptides were analyzed by FTIR and compared to unreacted stock solutions.**

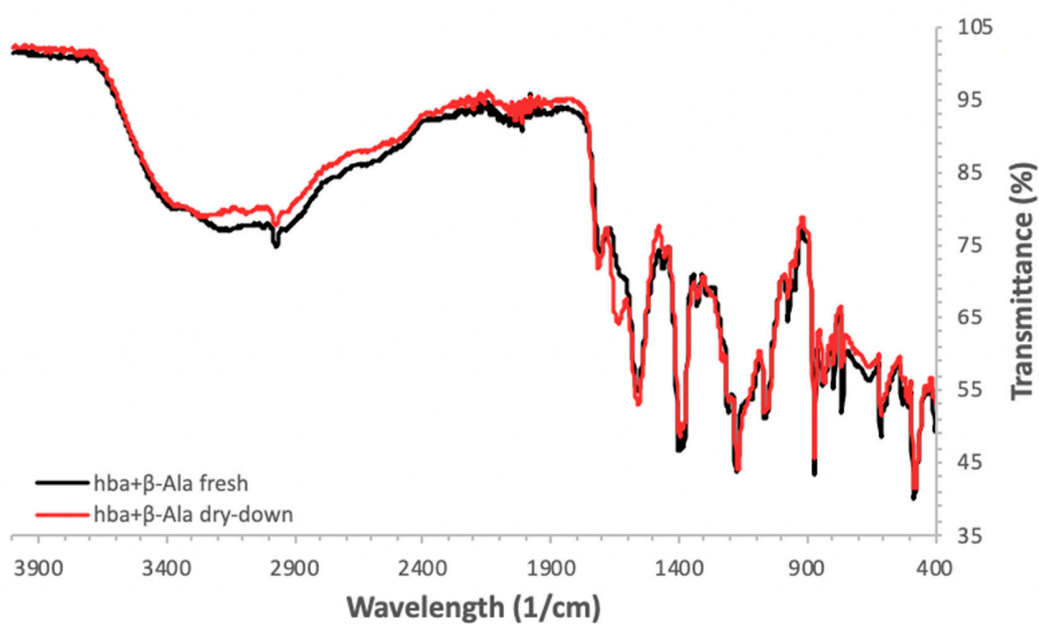

**Figure S34. FTIR spectra changes upon single-step dry-down reactions of 3-hydroxybutanoic acid (hba) and beta-alanine ( $\beta$ -Ala) support the formation of depsipeptides. hba and  $\beta$ -Ala were dried at 85 °C for seven days and the resulting depsipeptides were analyzed by FTIR and compared to unreacted stock solutions.**

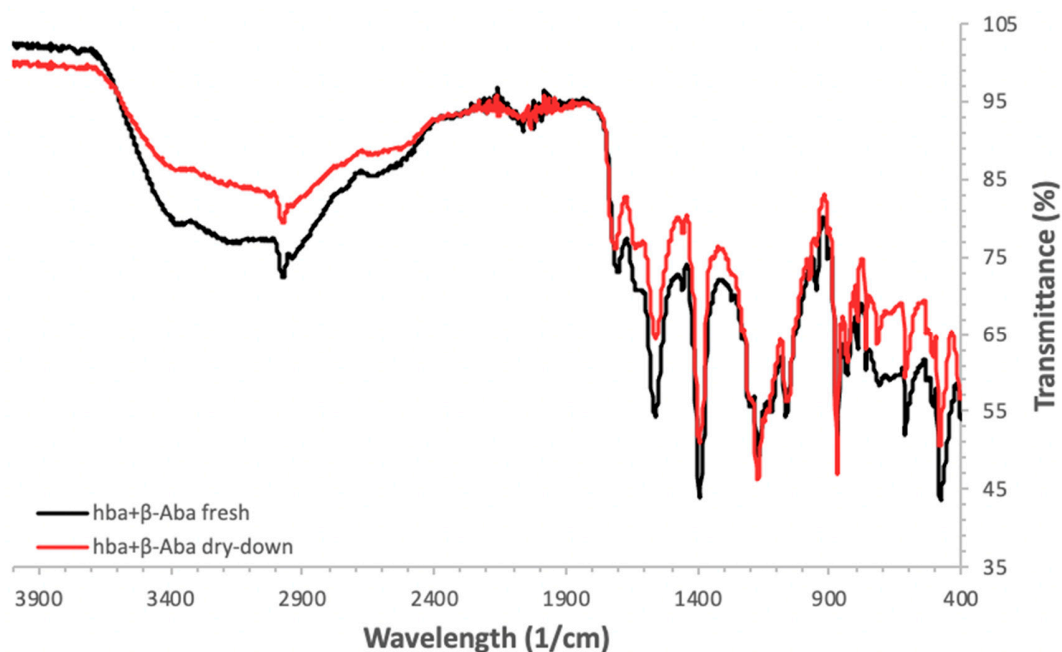

**Figure S35. FTIR spectra changes upon single-step dry-down reactions of 3-hydroxybutanoic acid (hba) and beta-aminobutyric acid ( $\beta$ -Aba) support the formation of depsipeptides. hba and  $\beta$ -Aba were dried at 85 °C for seven days and the resulting depsipeptides were analyzed by FTIR and compared to unreacted stock solutions.**

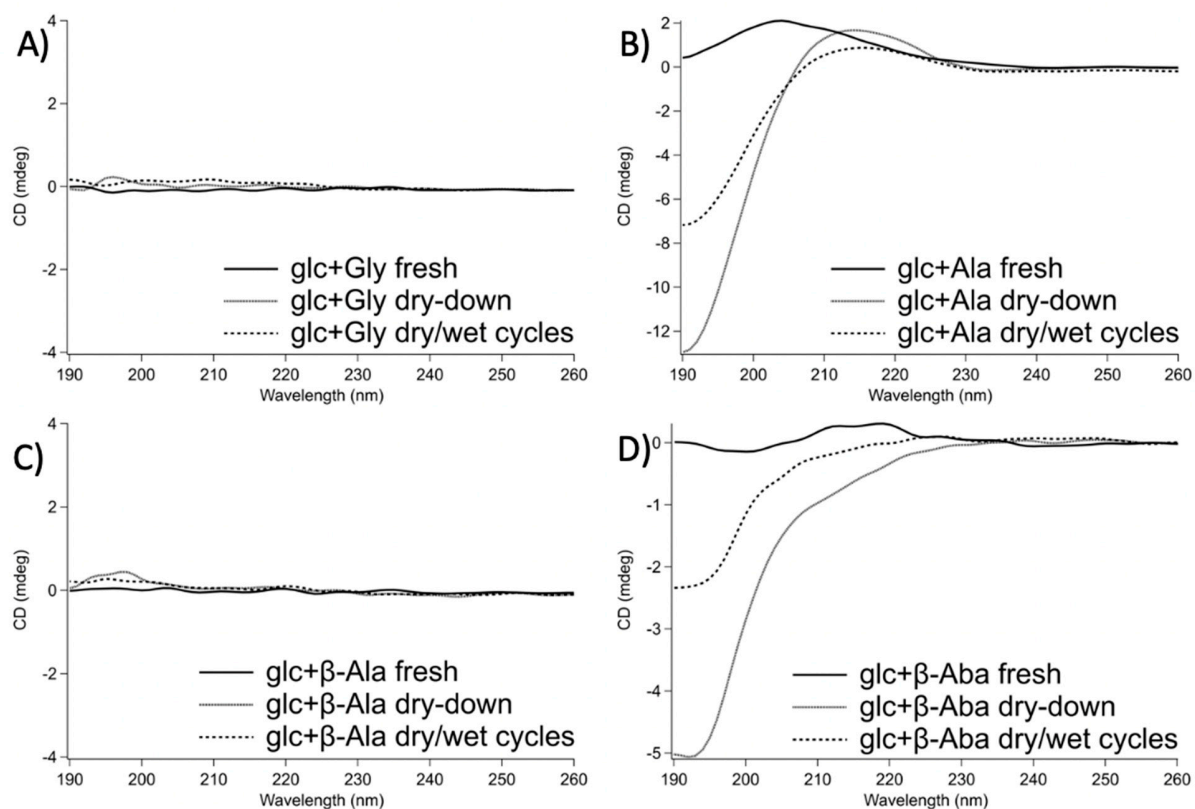

**Figure S36. Circular Dichroism spectra of glycolic acid (glc) single-step dry-down reactions and dry/wet cycling reactions with the amino acids. glc and either Gly (A), Ala (B),  $\beta$ -Ala (C), and  $\beta$ -Aba (D) were either subjected to single-step dry-down or to daily dry/wet cycling (16 hr dry/8 hr wet) for seven days at 85 °C and then analyzed by circular dichroism.**

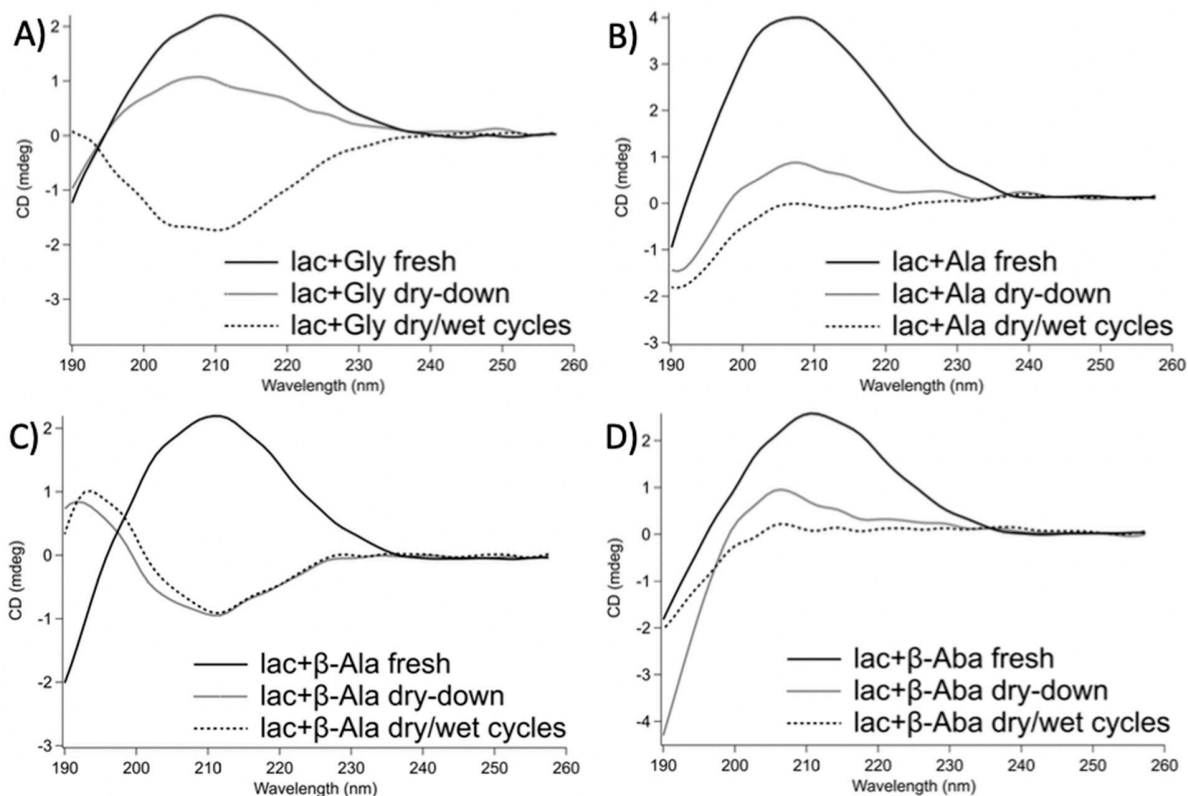

**Figure S37. Circular Dichroism spectra of lactic acid (lac) single-step dry-down reactions and dry/wet cycling reactions with the amino acids.** lac and either Gly (A), Ala (B),  $\beta$ -Ala (C), and  $\beta$ -Aba (D) were either subjected to single-step dry-down or to daily dry/wet cycling (16 hr dry/8 hr wet) for seven days at 85 °C and then analyzed by circular dichroism.



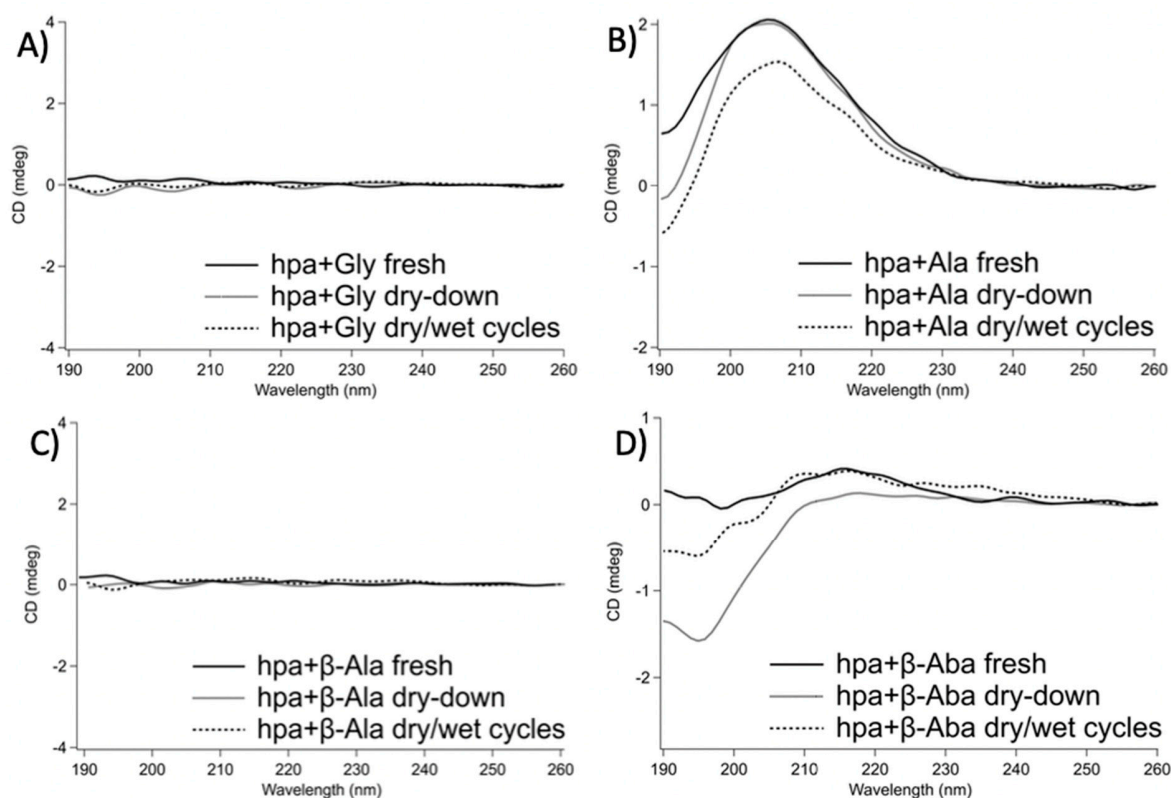

**Figure S38. Circular Dichroism spectra of 3-hydroxypropanoic acid (hpa) single-step dry-down reactions and dry/wet cycling reactions with the amino acids.** hpa and either Gly (A), Ala (B),  $\beta$ -Ala (C), and  $\beta$ -Aba (D) were either subjected to single-step dry-down or to daily dry/wet cycling (16 hr dry/8 hr wet) for seven days at 85 °C and then analyzed by circular dichroism.

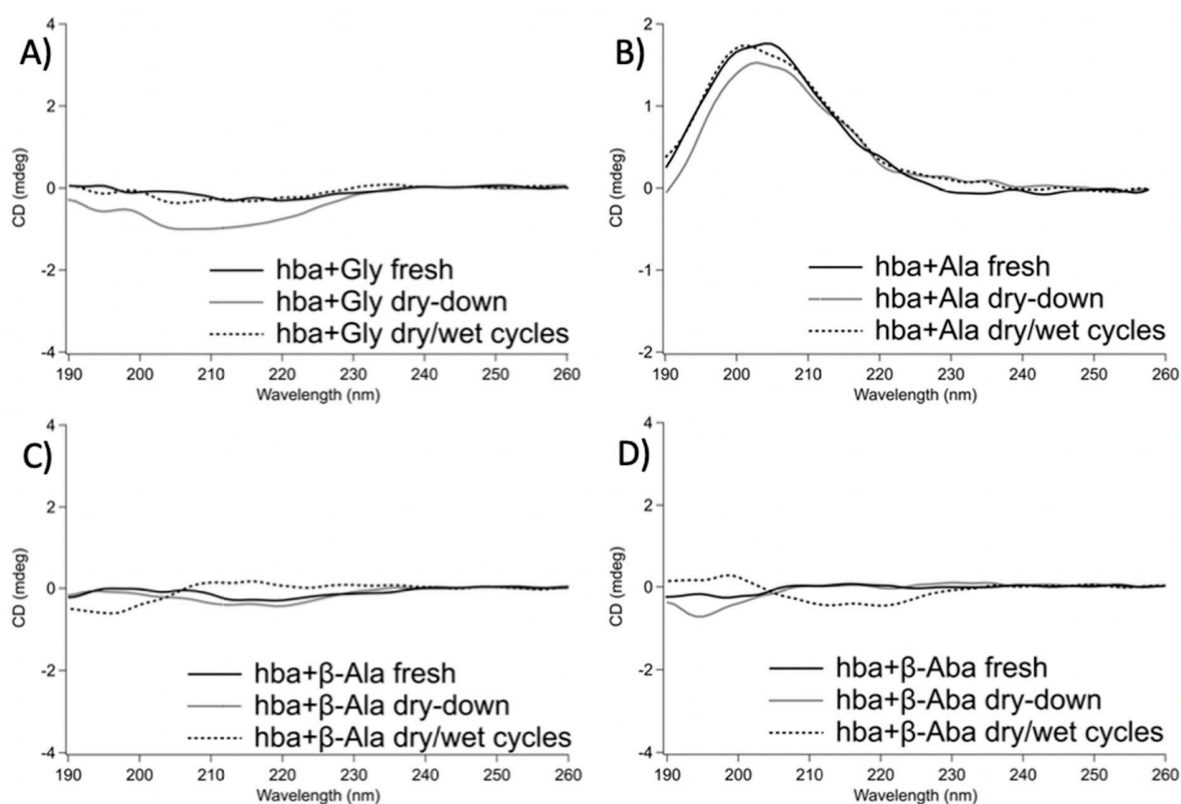

**Figure S39. Circular Dichroism spectra of 3-hydroxybutanoic acid (hba) single-step dry-down reactions and dry/wet cycling reactions with the amino acids. hba and either Gly (A), Ala (B),  $\beta$ -Ala (C), and  $\beta$ -Aba (D) were either subjected to single-step dry-down or to daily dry/wet cycling (16 hr dry/8 hr wet) for seven days at 85 °C and then analyzed by circular dichroism.**

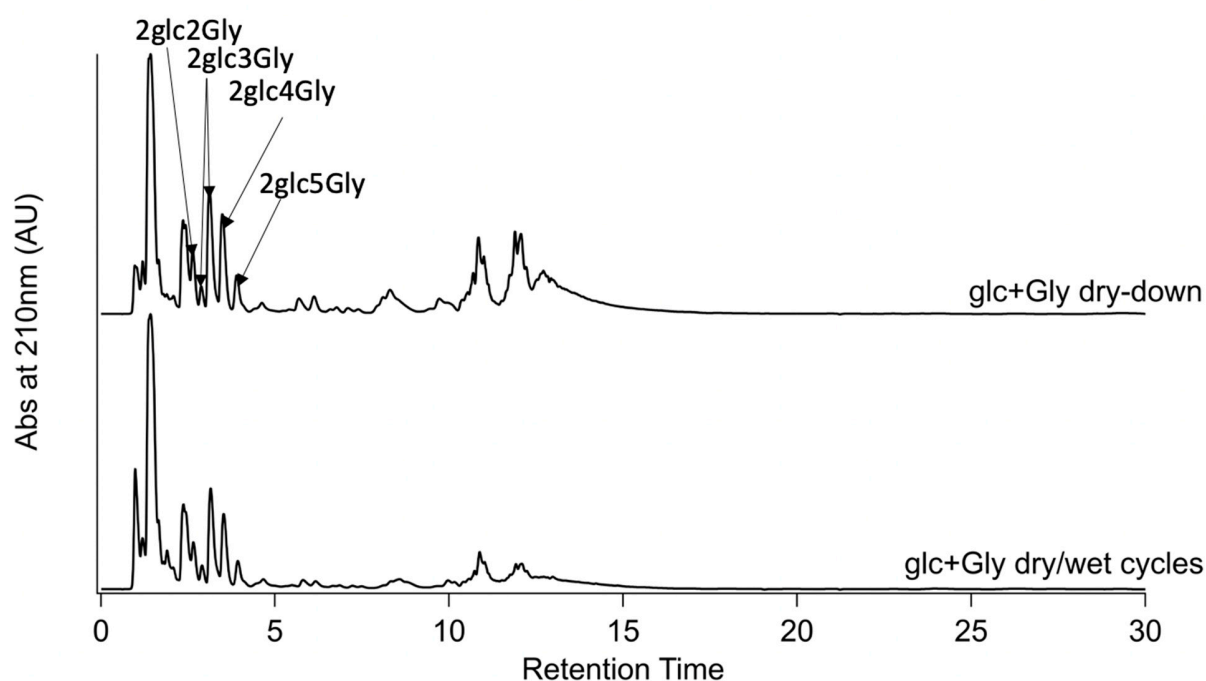

**Figure S40. C18-HPLC analysis verifies the formation of depsipeptides following single-step dry-down reactions and dry/wet cycling reactions of glycolic acid (glc) and glycine (Gly).** A mixture of glc and Gly was subjected to single-step dry-down at 85 °C or to daily dry/wet cycling (16 hr dry/8 hr wet) for seven days. The resulting depsipeptides were analyzed by hydrophobicity-based separation using C18-HPLC and the peaks were identified by LC-MS. Some of the identified peaks are labelled. Note that in many cases there are several species that co-elute, and the assignments are not necessarily denoting pure peptides/depsipeptides that are associated with the labelled peaks. The presence of various peaks verifies the heterogenous nature of the product mixture.

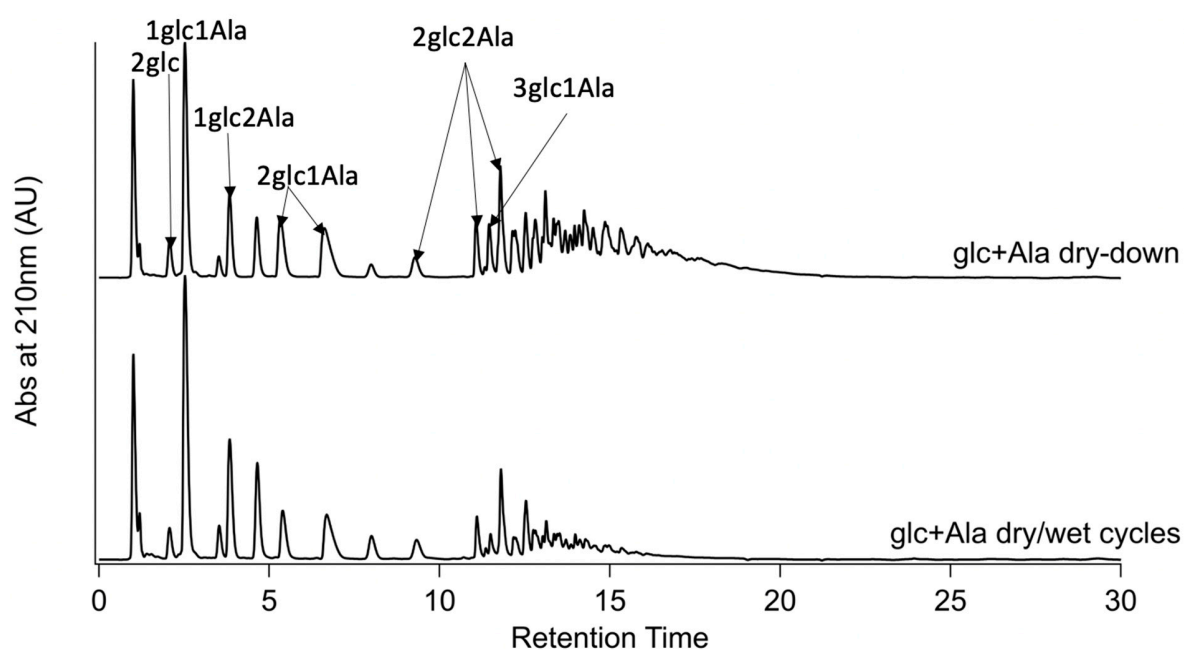

**Figure S41. C18-HPLC analysis verifies the formation of depsipeptides following single-step dry-down reactions and dry/wet cycling reactions of glycolic acid (glc) and alanine (Ala).** A mixture of glc and Ala was subjected to single-step dry-down at 85 °C or to daily dry/wet cycling (16 hr dry/8 hr wet) for seven days. The resulting depsipeptides were analyzed by hydrophobicity-based separation using C18-HPLC and the peaks were identified by LC-MS. The presence of various peaks verifies the

heterogenous nature of the product mixture and provides a relative abundance of the various polymers.

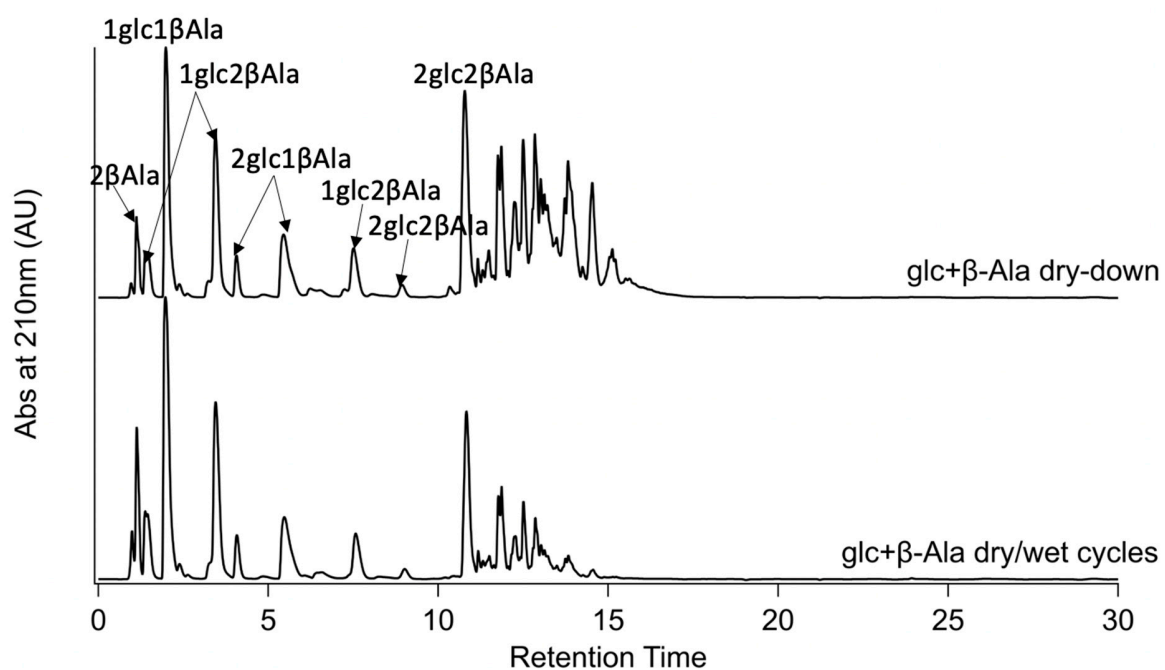

**Figure S42.** C18-HPLC analysis verifies the formation of depsipeptides following single-step dry-down reactions and dry/wet cycling reactions of glycolic acid (glc) and

**beta-alanine ( $\beta$ -Ala).** A mixture of **glc** and  **$\beta$ -Ala** was subjected to single-step dry-down at 85 °C or to daily dry/wet cycling (16 hr dry/8 hr wet) for seven days. The resulting depsipeptides were analyzed by hydrophobicity-based separation using C18-HPLC and the peaks were identified by LC-MS. The presence of various peaks verifies the heterogenous nature of the product mixture and provides a relative abundance of the various polymers.

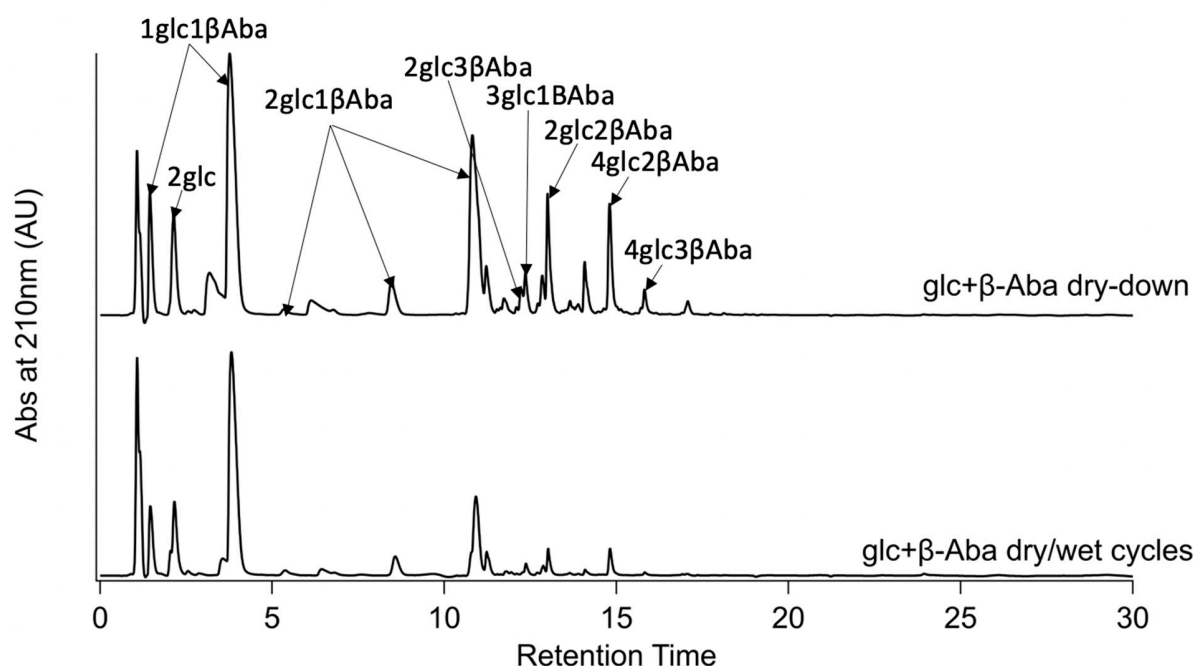

**Figure S43. C18-HPLC analysis verifies the formation of depsipeptides following single-step dry-down reactions and dry/wet cycling reactions of glycolic acid (glc) and beta-aminobutyric acid (β-Aba).** A mixture of glc and β-Aba was subjected to single-step dry-down at 85 °C or to daily dry/wet cycling (16 hr dry/8 hr wet) for seven days. The resulting depsipeptides were analyzed by hydrophobicity-based separation using C18-HPLC and the peaks were identified by LC-MS. The presence of various peaks verifies the heterogenous nature of the product mixture and provides a relative abundance of the various polymers.

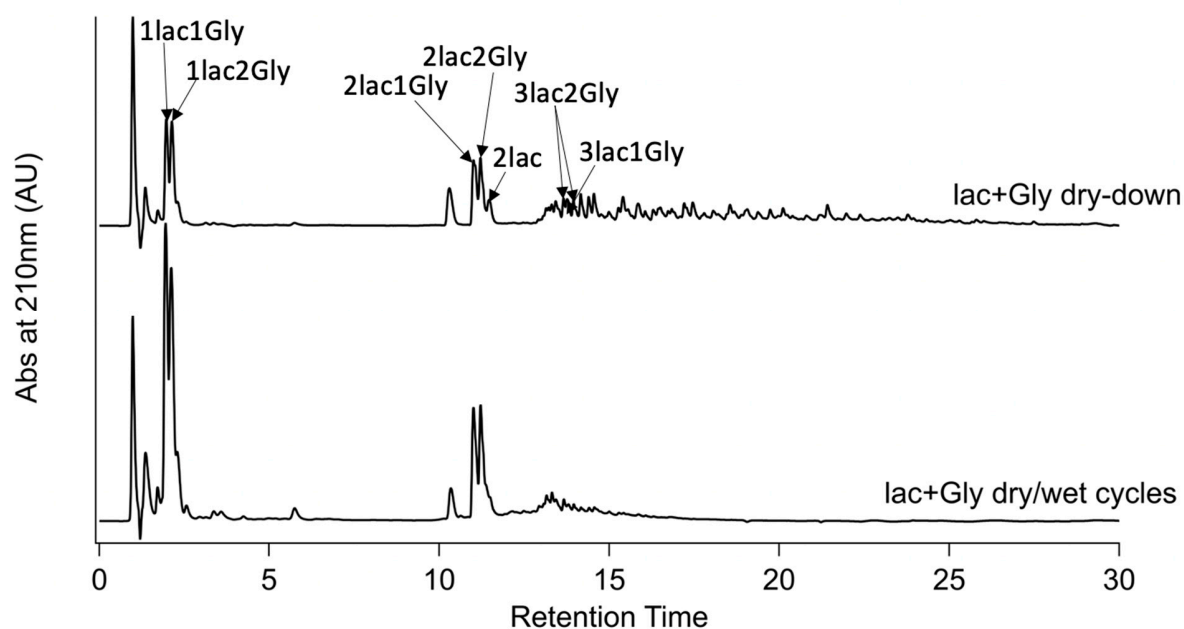

**Figure S44. C18-HPLC analysis verifies the formation of depsipeptides following single-step dry-down reactions and dry/wet cycling reactions of lactic acid (lac) and glycine (Gly).** A mixture of glc and Gly was subjected to single-step dry-down at 85 °C or to daily dry/wet cycling (16 hr dry/8 hr wet) for seven days. The resulting depsipeptides were analyzed by hydrophobicity-based separation using C18-HPLC and the peaks were identified by LC-MS. The presence of various peaks verifies the heterogenous nature of the product mixture and provides a relative abundance of the various polymers.



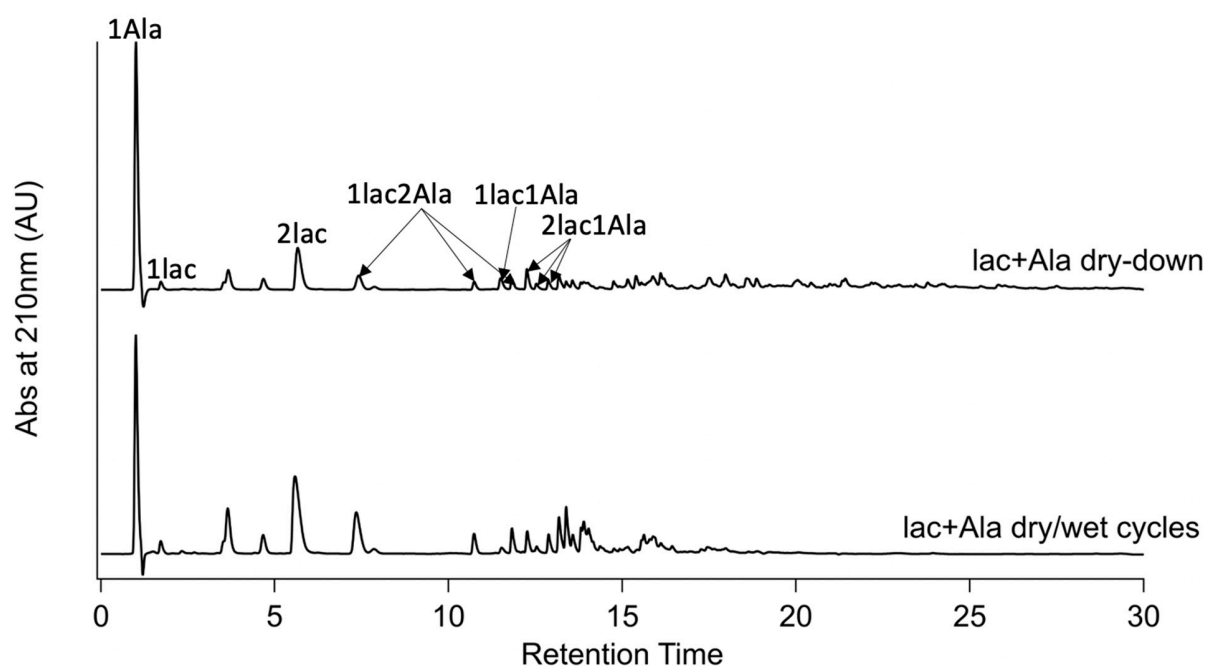

**Figure S45. C18-HPLC analysis verifies the formation of depsipeptides following single-step dry-down reactions and dry/wet cycling reactions of lactic acid (lac) and alanine (Ala).** A mixture of glc and Ala was subjected to single-step dry-down at 85 °C or to daily dry/wet cycling (16 hr dry/8 hr wet) for seven days. The resulting depsipeptides were analyzed by hydrophobicity-based separation using C18-HPLC and the peaks were identified by LC-MS. The presence of various peaks verifies the heterogenous nature of the product mixture and provides a relative abundance of the various polymers.

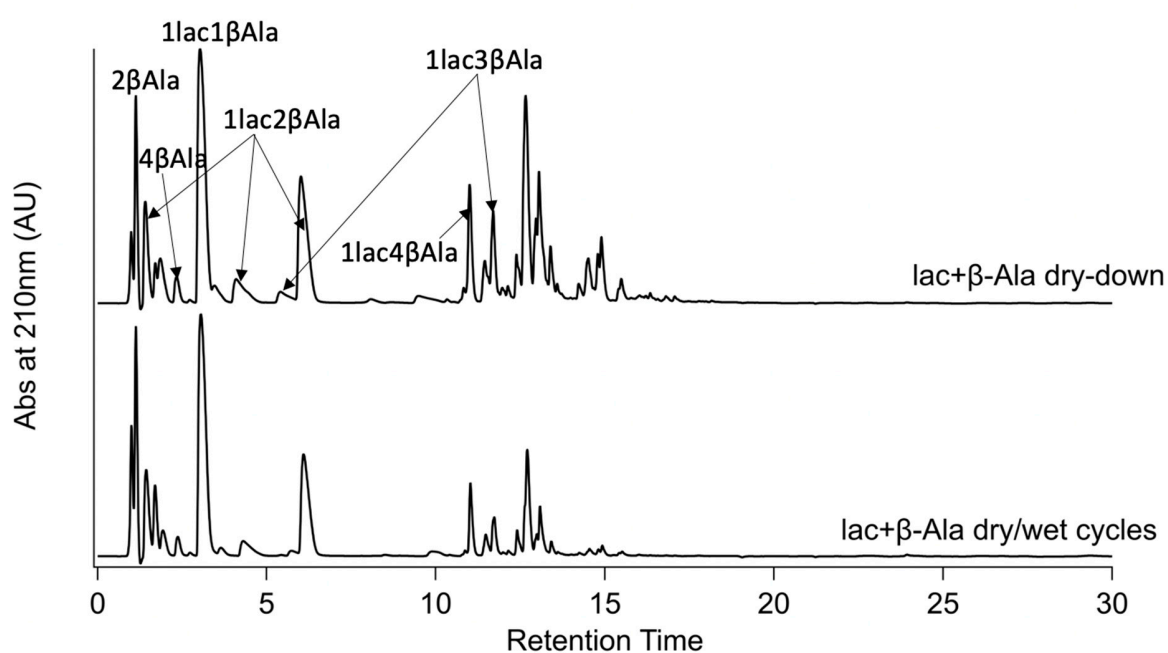

**Figure S46. C18-HPLC analysis verifies the formation of depsipeptides following single-step dry-down reactions and dry/wet cycling reactions of lactic acid (lac) and beta-alanine ( $\beta$ -Ala).** A mixture of glc and  $\beta$ -Ala was subjected to single-step dry-down at 85 °C or to daily dry/wet cycling (16 hr dry/8 hr wet) for seven days. The resulting depsipeptides were analyzed by hydrophobicity-based separation using C18-HPLC and the peaks were identified by LC-MS. The presence of various peaks verifies the heterogenous nature of the product mixture and provides a relative abundance of the various polymers.

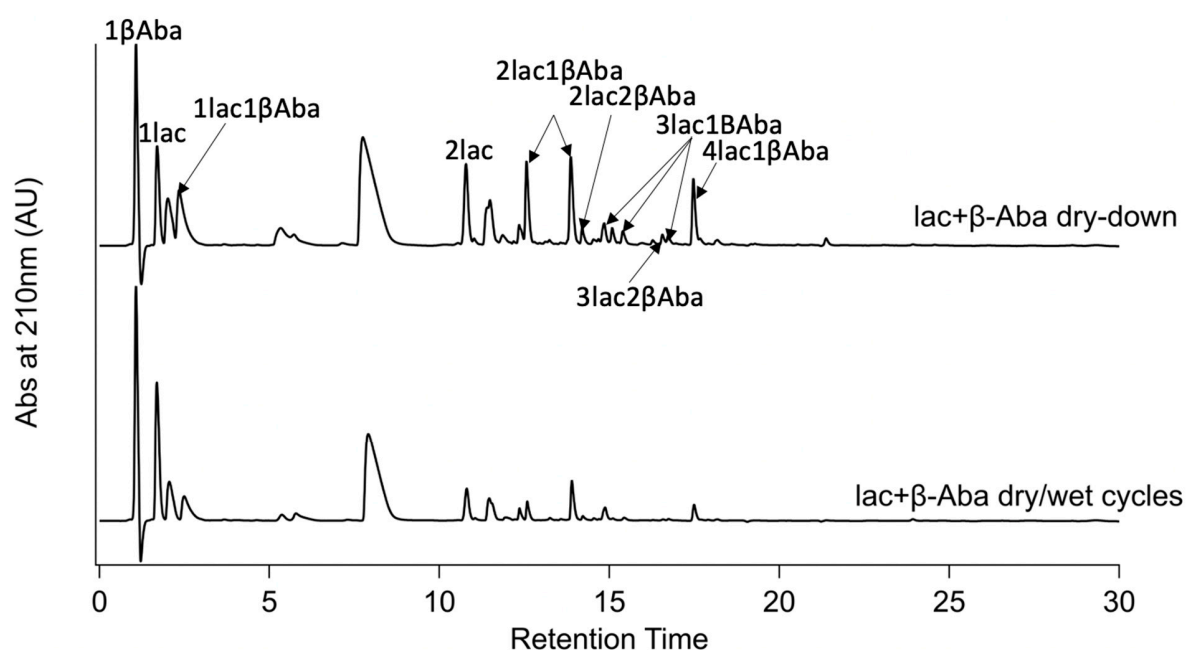

**Figure S47. C18-HPLC analysis verifies the formation of depsipeptides following single-step dry-down reactions and dry/wet cycling reactions of lactic acid (lac) and beta-aminobutyric acid ( $\beta$ -Aba).** A mixture of glc and  $\beta$ -Aba was subjected to single-step dry-down at 85 °C or to daily dry/wet cycling (16 hr dry/8 hr wet) for seven days. The resulting depsipeptides were analyzed by hydrophobicity-based separation using C18-HPLC and the peaks were identified by LC-MS. The presence of various peaks verifies the heterogenous nature of the product mixture and provides a relative abundance of the various polymers.

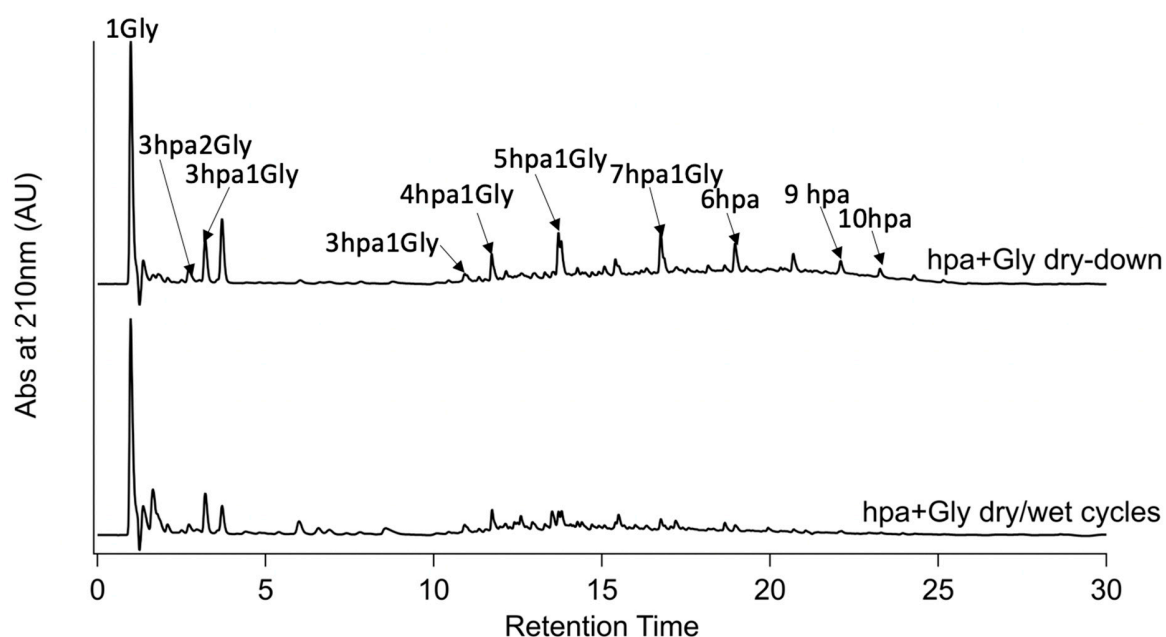

**Figure S48. C18-HPLC analysis verifies the formation of depsipeptides following single-step dry-down reactions and dry/wet cycling reactions of 3-hydroxypropanoic acid (hpa) and glycine (Gly).** A mixture of hpa and Gly was subjected to single-step dry-down at 85 °C or to daily dry/wet cycling (16 hr dry/8 hr wet) for seven days. The resulting depsipeptides were analyzed by hydrophobicity-based separation using C18-HPLC and the peaks were identified by LC-MS. The presence of various peaks verifies the

heterogenous nature of the product mixture and provides a relative abundance of the various polymers.

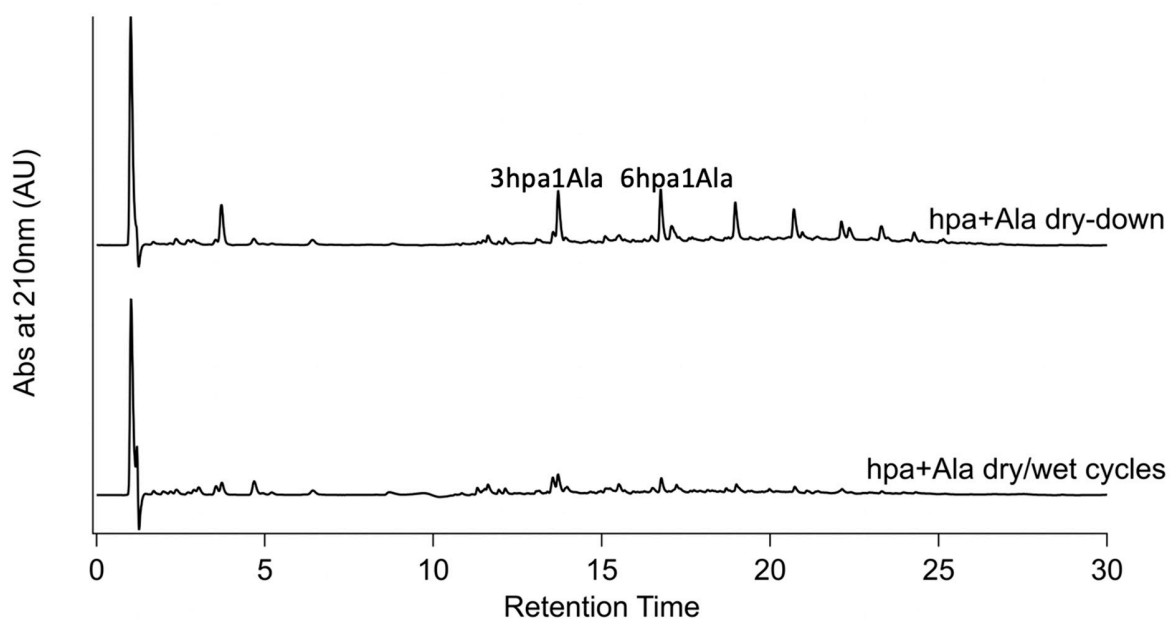

**Figure S49.** C18-HPLC analysis verifies the formation of depsipeptides following single-step dry-down reactions and dry/wet cycling reactions of 3-hydroxypropanoic

**acid (hpa) and alanine (Ala).** A mixture of **hpa** and **Ala** was subjected to single-step dry-down at 85 °C or to daily dry/wet cycling (16 hr dry/8 hr wet) for seven days. The resulting depsipeptides were analyzed by hydrophobicity-based separation using C18-HPLC and the peaks were identified by LC-MS. The presence of various peaks verifies the heterogenous nature of the product mixture and provides a relative abundance of the various polymers.

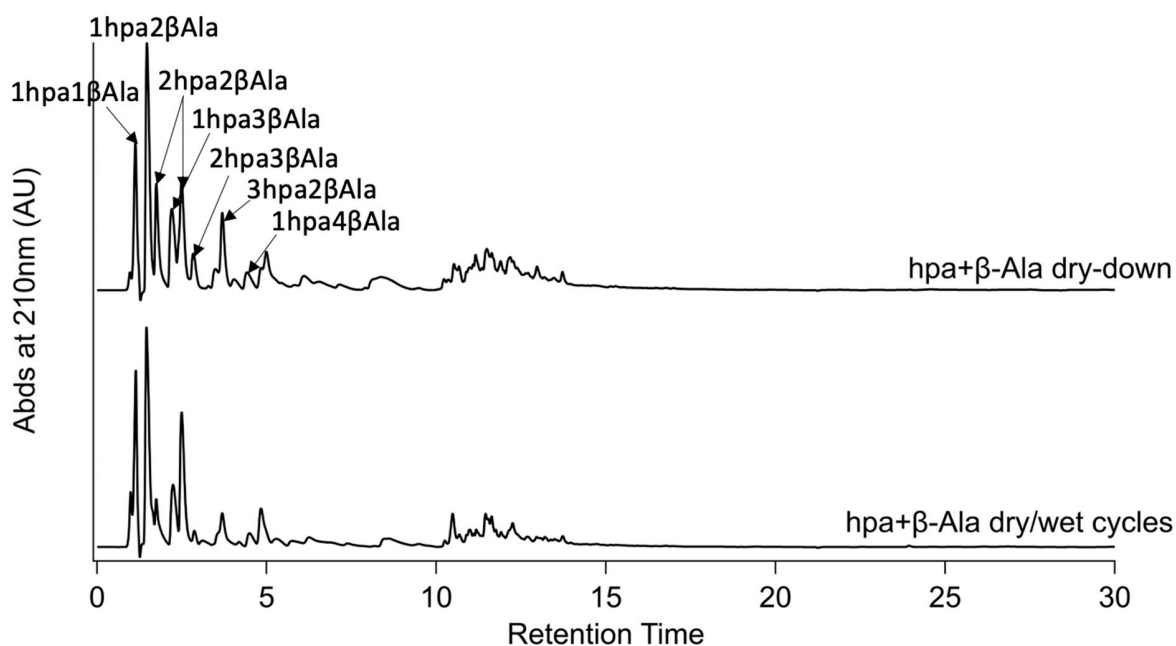

**Figure S50. C18-HPLC analysis verifies the formation of depsipeptides following single-step dry-down reactions and dry/wet cycling reactions of 3-hydroxypropanoic acid (hpa) and beta-alanine (β-Ala).** A mixture of hpa and β-Ala was subjected to single-step dry-down at 85 °C or to daily dry/wet cycling (16 hr dry/8 hr wet) for seven days. The resulting depsipeptides were analyzed by hydrophobicity-based separation using C18-HPLC and the peaks were identified by LC-MS. The presence of various peaks verifies the heterogenous nature of the product mixture and provides a relative abundance of the various polymers.

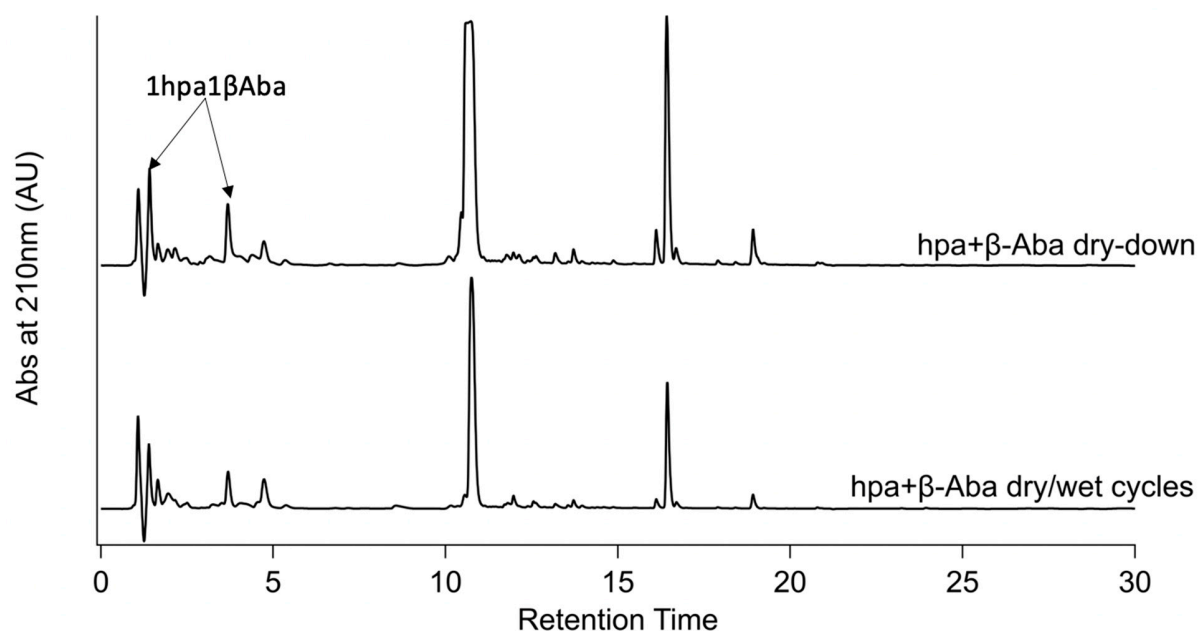

**Figure S51. C18-HPLC analysis verifies the formation of depsipeptides following single-step dry-down reactions and dry/wet cycling reactions of 3-hydroxypropanoic acid (hpa) and beta-aminobutyric acid ( $\beta$ -Aba).** A mixture of hpa and  $\beta$ -Aba was subjected to single-step dry-down at 85 °C or to daily dry/wet cycling (16 hr dry/8 hr wet) for seven days. The resulting depsipeptides were analyzed by hydrophobicity-based separation using C18-HPLC and the peaks were identified by LC-MS. The presence of various peaks verifies the heterogenous nature of the product mixture and provides a relative abundance of the various polymers.



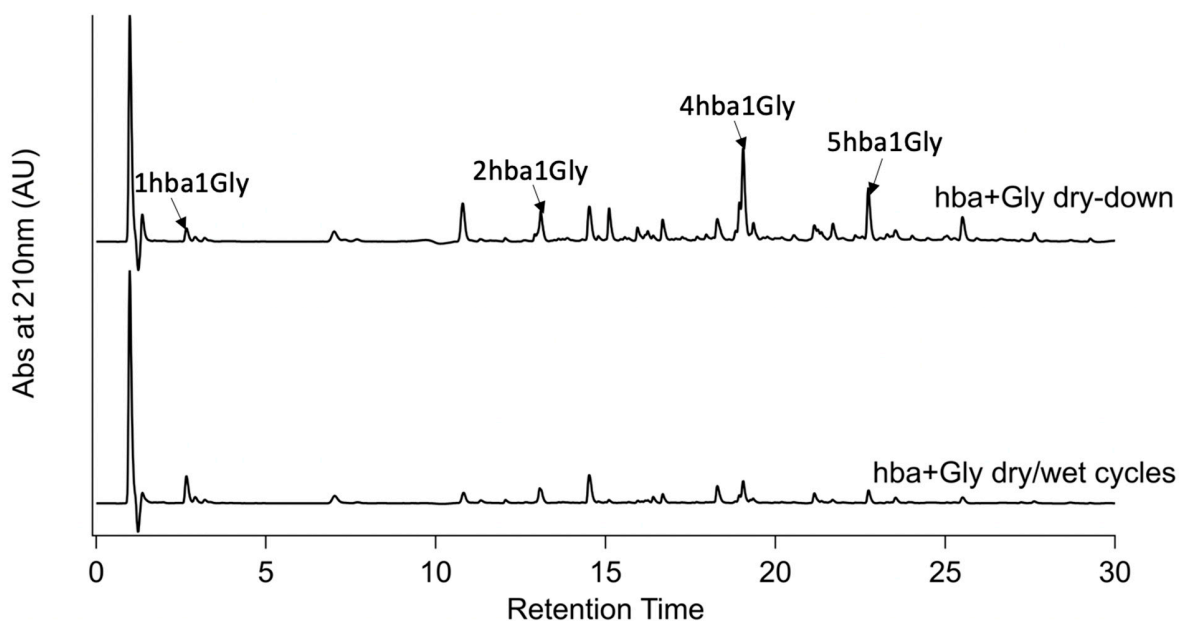

**Figure S52. C18-HPLC analysis verifies the formation of depsipeptides following single-step dry-down reactions and dry/wet cycling reactions of 3-hydroxybutanoic acid (hba) and glycine (Gly).** A mixture of hba and Gly was subjected to single-step dry-down at 85 °C or to daily dry/wet cycling (16 hr dry/8 hr wet) for seven days. The resulting depsipeptides were analyzed by hydrophobicity-based separation using C18-HPLC and the peaks were identified by LC-MS. The presence of various peaks verifies the heterogenous nature of the product mixture and provides a relative abundance of the various polymers.

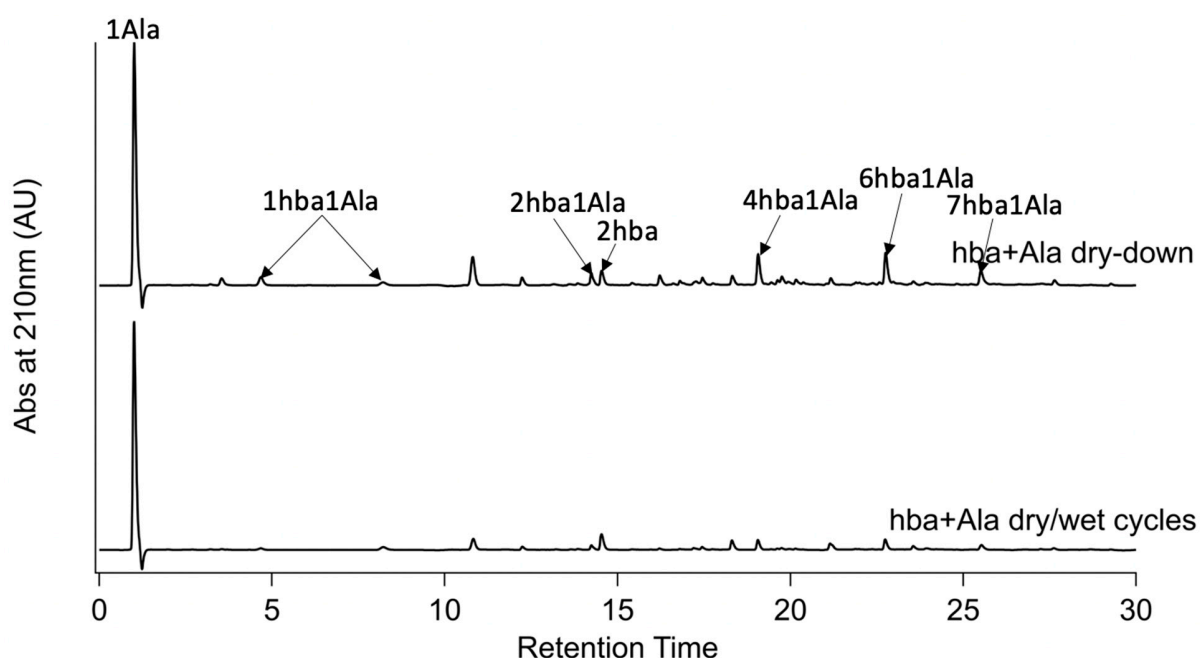

**Figure S53. C18-HPLC analysis verifies the formation of depsipeptides following single-step dry-down reactions and dry/wet cycling reactions of 3-hydroxybutanoic acid (hba) and alanine (Ala).** A mixture of hba and Ala was subjected to single-step dry-down at 85 °C or to daily dry/wet cycling (16 hr dry/8 hr wet) for seven days. The resulting depsipeptides were analyzed by hydrophobicity-based separation using C18-HPLC and the peaks were identified by LC-MS. The presence of various peaks verifies the heterogenous nature of the product mixture and provides a relative abundance of the various polymers.

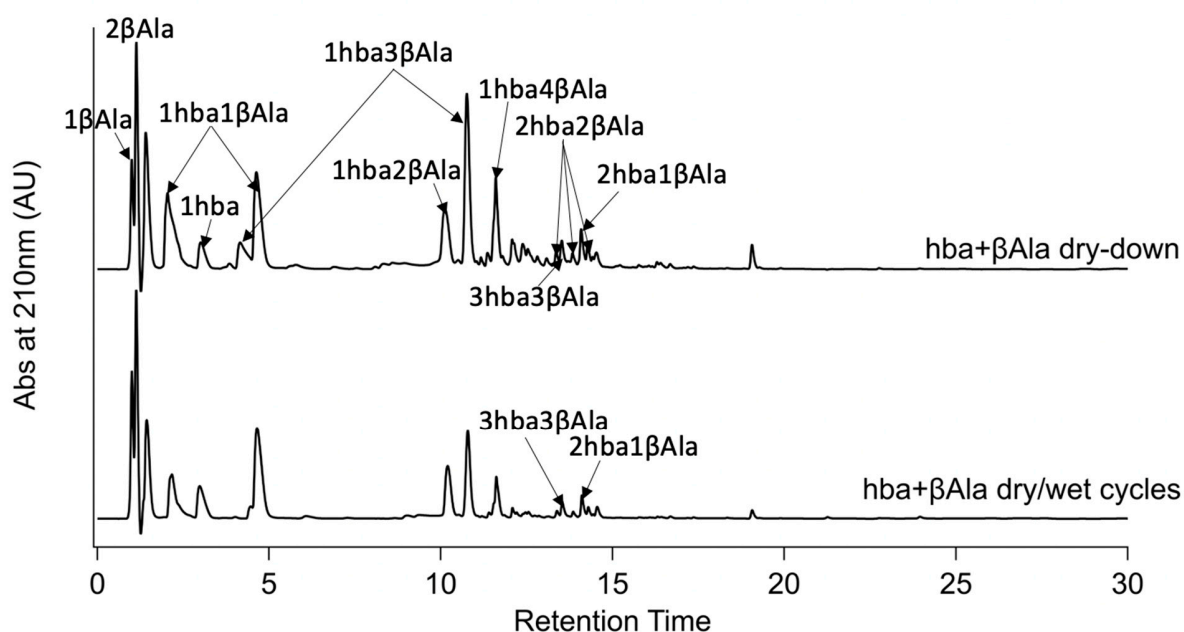

**Figure S54. C18-HPLC analysis verifies the formation of depsipeptides following single-step dry-down reactions and dry/wet cycling reactions of 3-hydroxybutanoic acid (hba) and beta-alanine ( $\beta$ -Ala).** A mixture of hba and  $\beta$ -Ala was subjected to single-step dry-down at 85 °C or to daily dry/wet cycling (16 hr dry/8 hr wet) for seven days. The resulting depsipeptides were analyzed by hydrophobicity-based separation using C18-HPLC and the peaks were identified by LC-MS. The presence of various peaks

verifies the heterogenous nature of the product mixture and provides a relative abundance of the various polymers.

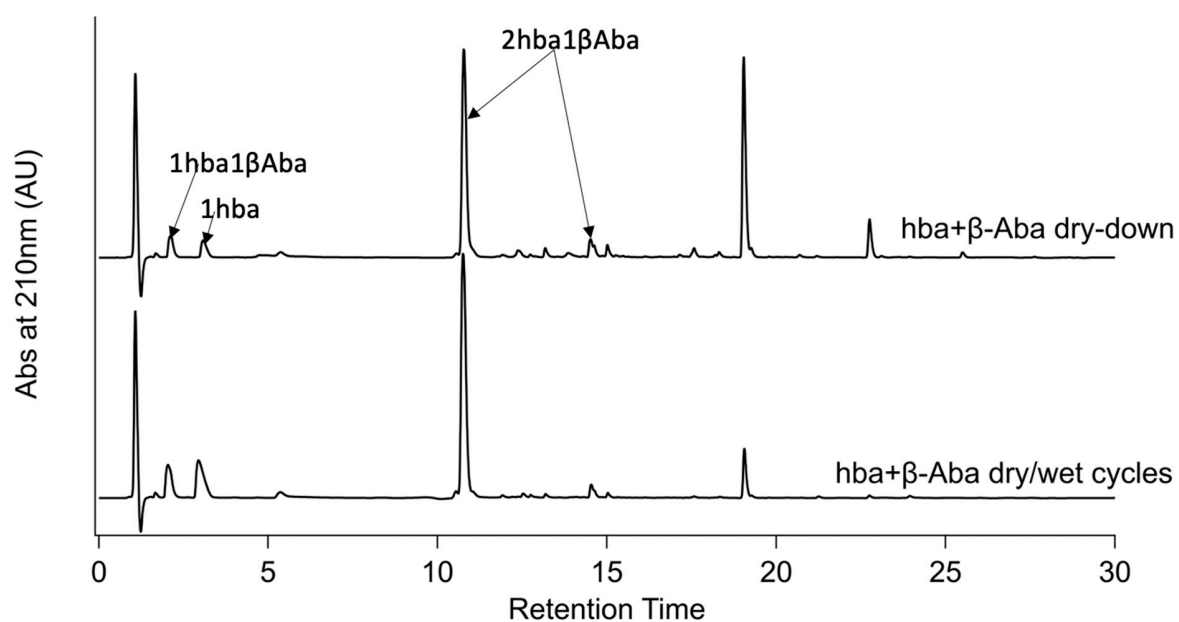

**Figure S55. C18-HPLC analysis verifies the formation of depsipeptides following single-step dry-down reactions and dry/wet cycling reactions of 3-hydroxybutanoic**

**acid (hba) and beta-aminobutyric acid ( $\beta$ -Aba).** A mixture of **hba** and  **$\beta$ -Aba** was subjected to single-step dry-down at 85 °C or to daily dry/wet cycling (16 hr dry/8 hr wet) for seven days. The resulting depsipeptides were analyzed by hydrophobicity-based separation using C18-HPLC and the peaks were identified by LC-MS. The presence of various peaks verifies the heterogenous nature of the product mixture and provides a relative abundance of the various polymers.

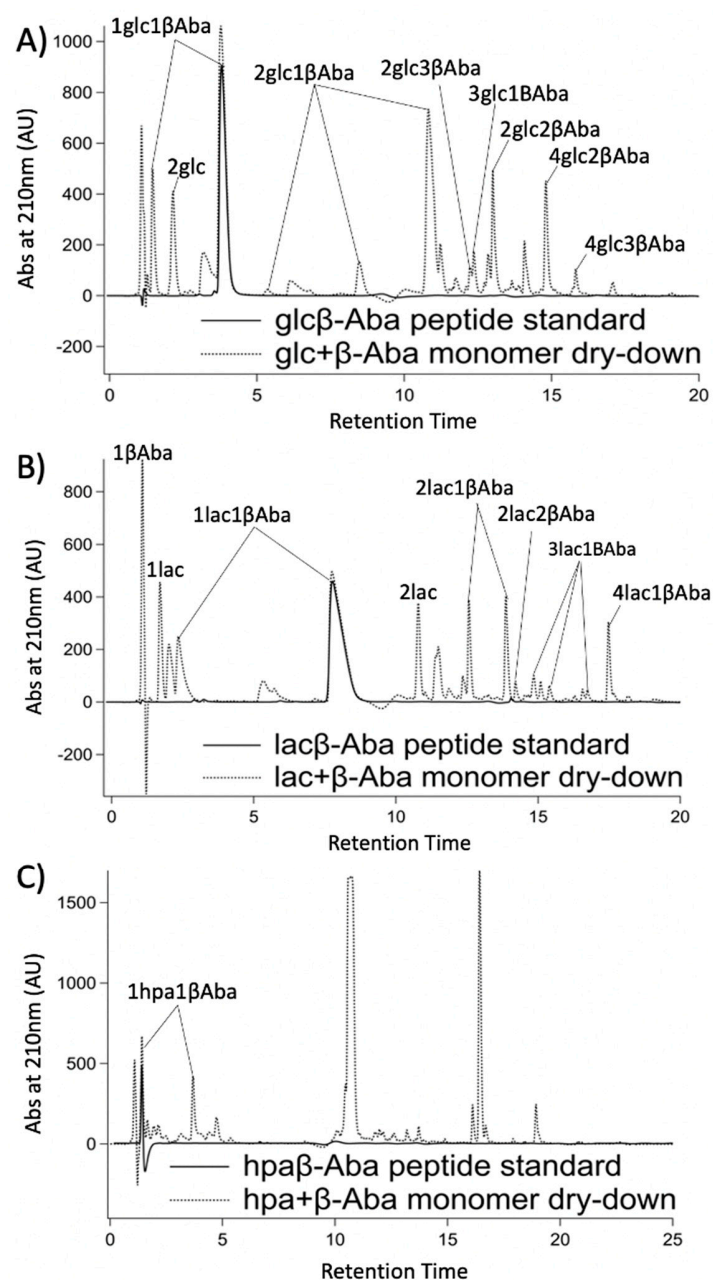

**Figure S56. C18-HPLC analysis of single-step dry-down reactions of beta-aminobutyric acid ( $\beta$ -Aba) overlaid with authentic standards. glc, lac, or hpa were dried with  $\beta$ -Aba at 85 °C for seven days and the resulting HPLC data (dashed lines) were overlaid with pure peptide dimers (black lines).**

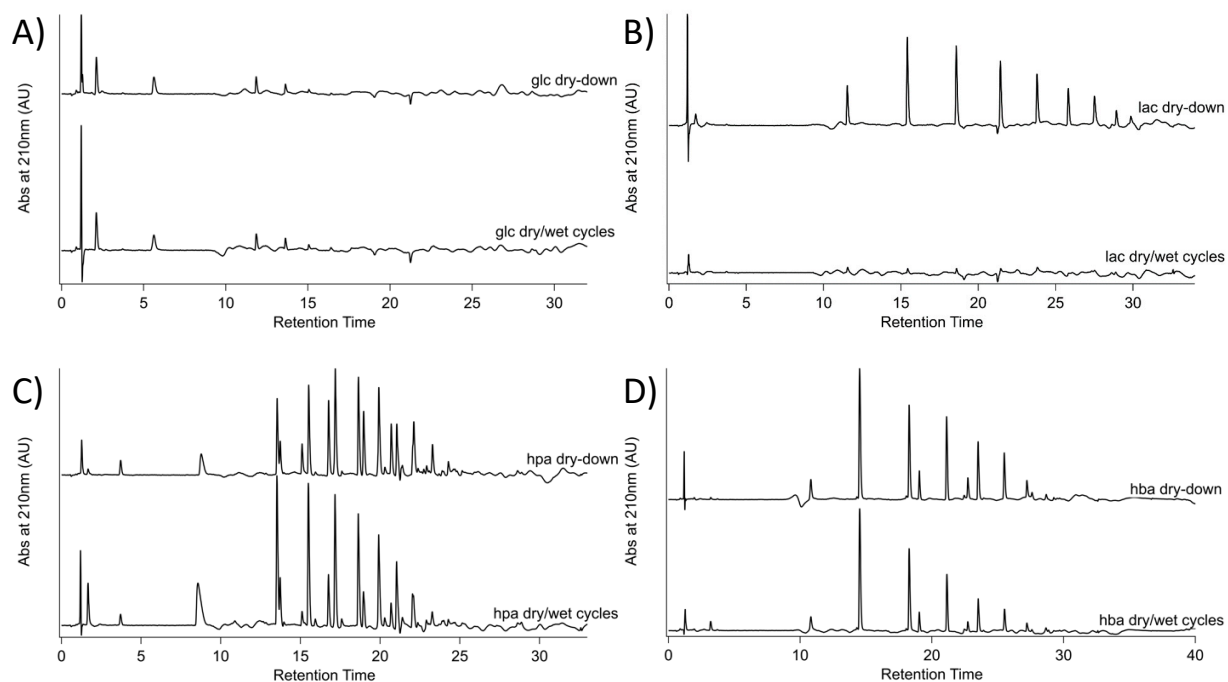

**Figure S57. C18-HPLC analysis of control single-step dry-down and dry/wet cycling reactions of the hydroxy acids in the absence of amino acids.** glycolic acid (**glc**, **A**), lactic acid (**lac**, **B**), 3-hydroxypropanoic acid (**hpa**, **C**), and 3-hydroxybutanoic acid (**hba**, **D**) were dried at 85°C or subjected to daily dry/wet cycling (18 hr dry/6 hr wet) for seven days and analyzed by a C18-HPLC column.

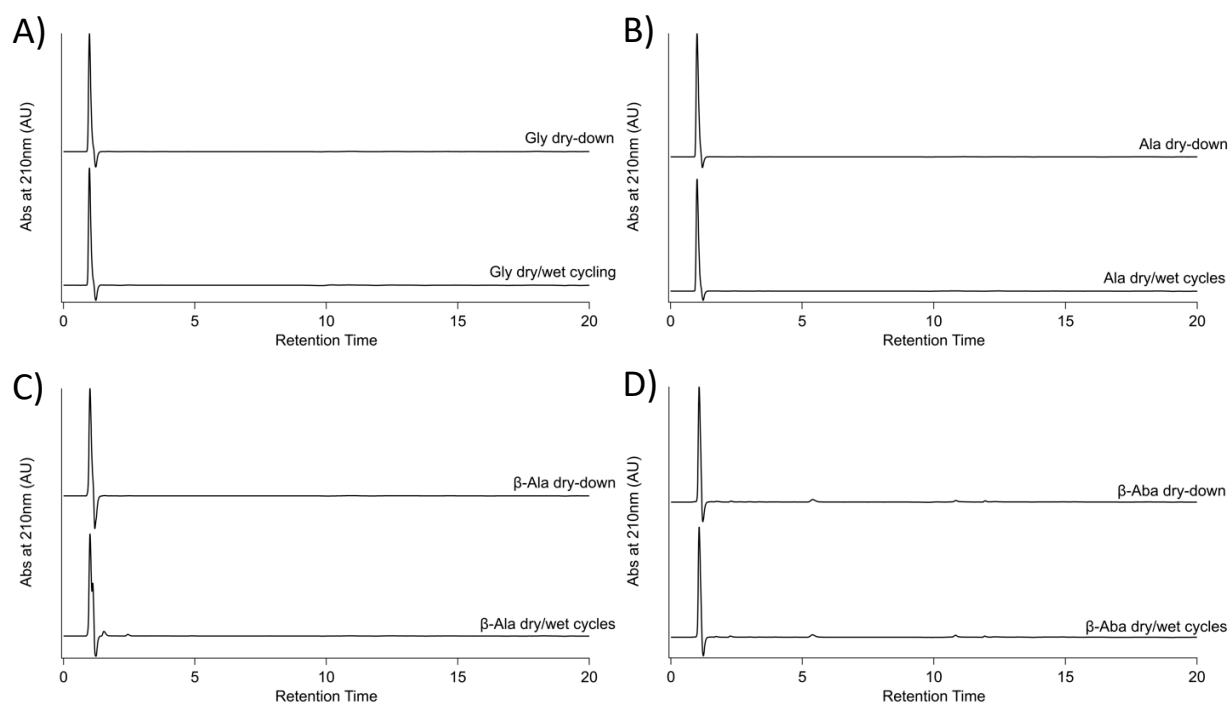

**Figure S58. C18-HPLC analysis of control single-step dry-down reactions of the amino acids in the absence of hydroxy acids.** Glycine (Gly, A), Alanine (Ala, B),  $\beta$ -alanine ( $\beta$ -Ala, C), and  $\beta$ -aminobutyric acid ( $\beta$ -Aba, D) were dried or subjected to daily dry/wet cycling (18 hr dry/6 hr wet) at 85°C for seven days and analyzed by a C18-HPLC column.



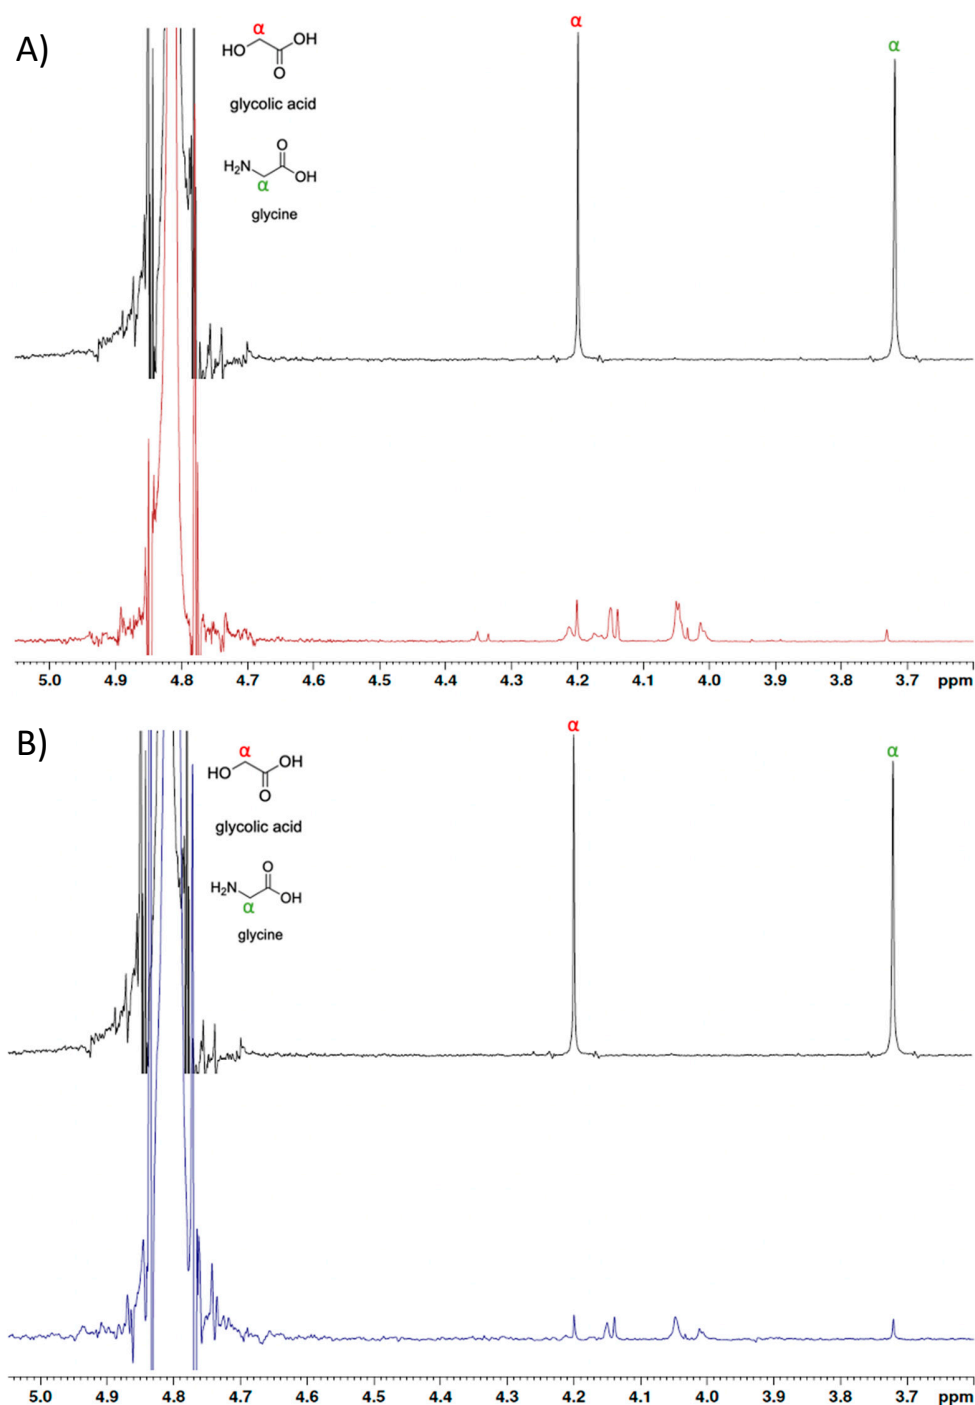

**Figure S59.**  $^1\text{H}$  NMR spectra exhibit the extent of depsipeptide formation upon (A) single-step dry-down reactions and (B) dry/wet cycling of glycolic acid (glc) and glycine (Gly).  $^1\text{H}$  NMR spectra of a mixture of glc and Gly in  $\text{D}_2\text{O}$  before (black) and after single-step dry-down reactions at  $85^\circ\text{C}$  for seven days (red) show a 97.9% conversion of Gly into depsipeptide. In comparison, spectra after daily dry/wet cycling of 16 hr dry/8

hr wet for seven days (blue) show a conversion of 89.6% of **Gly**.  $\alpha$ -protons of **glc** are labeled in red;  $\alpha$ -protons of **Gly** are labeled in green.

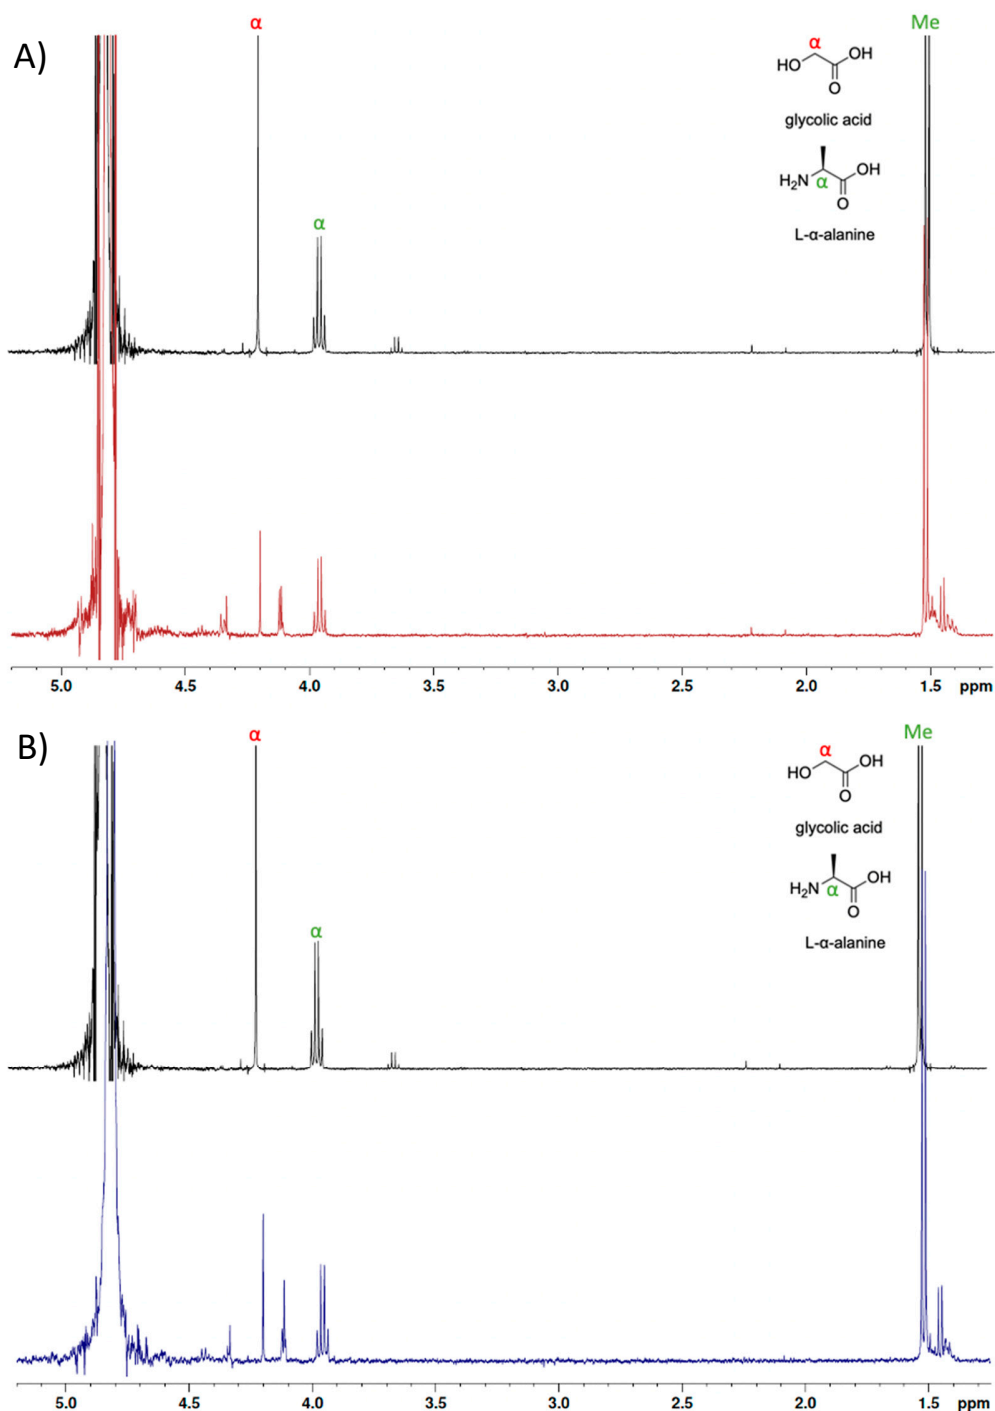

**Figure S60.**  $^1\text{H}$  NMR spectra exhibit the extent of depsipeptide formation upon (a) single-step dry-down reactions and (b) dry/wet cycling of glycolic acid (**glc**) and alanine (**Ala**).  $^1\text{H}$  NMR spectra of a mixture of **glc** and **Ala** in  $\text{D}_2\text{O}$  before (black) and after single-step dry-down reactions at  $85^\circ\text{C}$  for seven days (red) show a 40.1% conversion of

**Ala** into depsipeptide. In comparison, spectra after daily dry/wet cycling of 16 hr dry/8 hr wet for seven days (blue) show a conversion of 40.3%.  $\alpha$ -protons of **glc** are labeled in red;  $\alpha$ -proton of **Ala** are labeled in green.

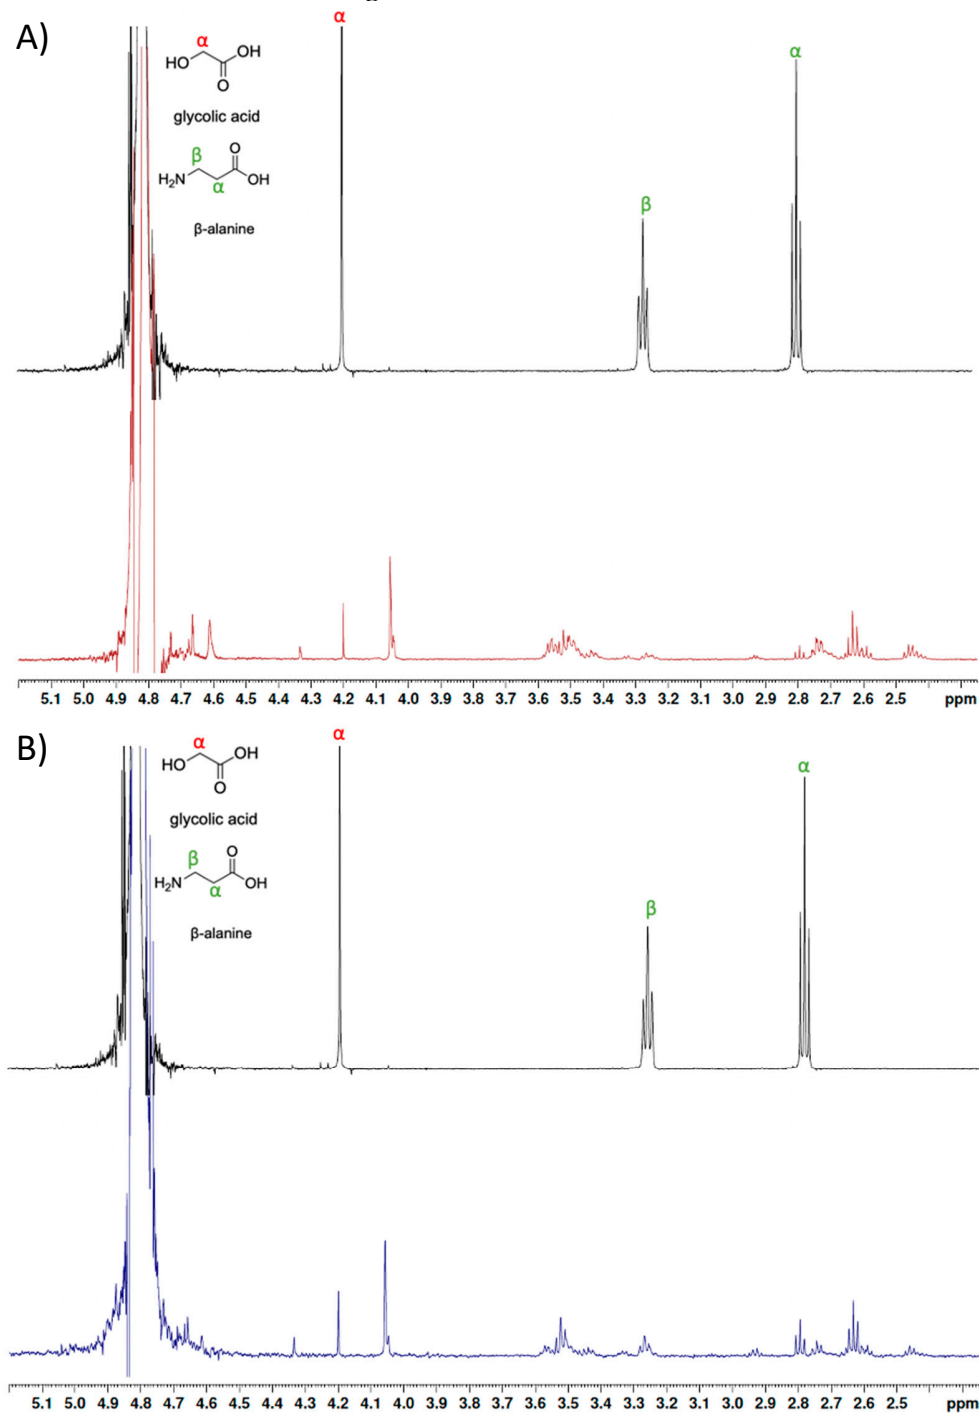

**Figure S61.**  $^1\text{H}$  NMR spectra exhibit the extent of depsipeptide formation upon (a) single-step dry-down reactions and (b) dry/wet cycling of glycolic acid (**glc**) and beta-alanine ( $\beta$ -**Ala**).  $^1\text{H}$  NMR spectra of a mixture of **glc** and  $\beta$ -**Ala** in  $\text{D}_2\text{O}$  before (black) and

after single-step dry-down reactions at 85 °C for seven days (red) show a 95.6% conversion of  $\beta$ -Ala into depsipeptide. In comparison, spectra after daily dry/wet cycling of 16 hr dry/8 hr wet for seven days (blue) show a conversion of 88.4%.  $\alpha$ -protons of **glc** are labeled in red; protons of  $\beta$ -Ala are labeled in green.

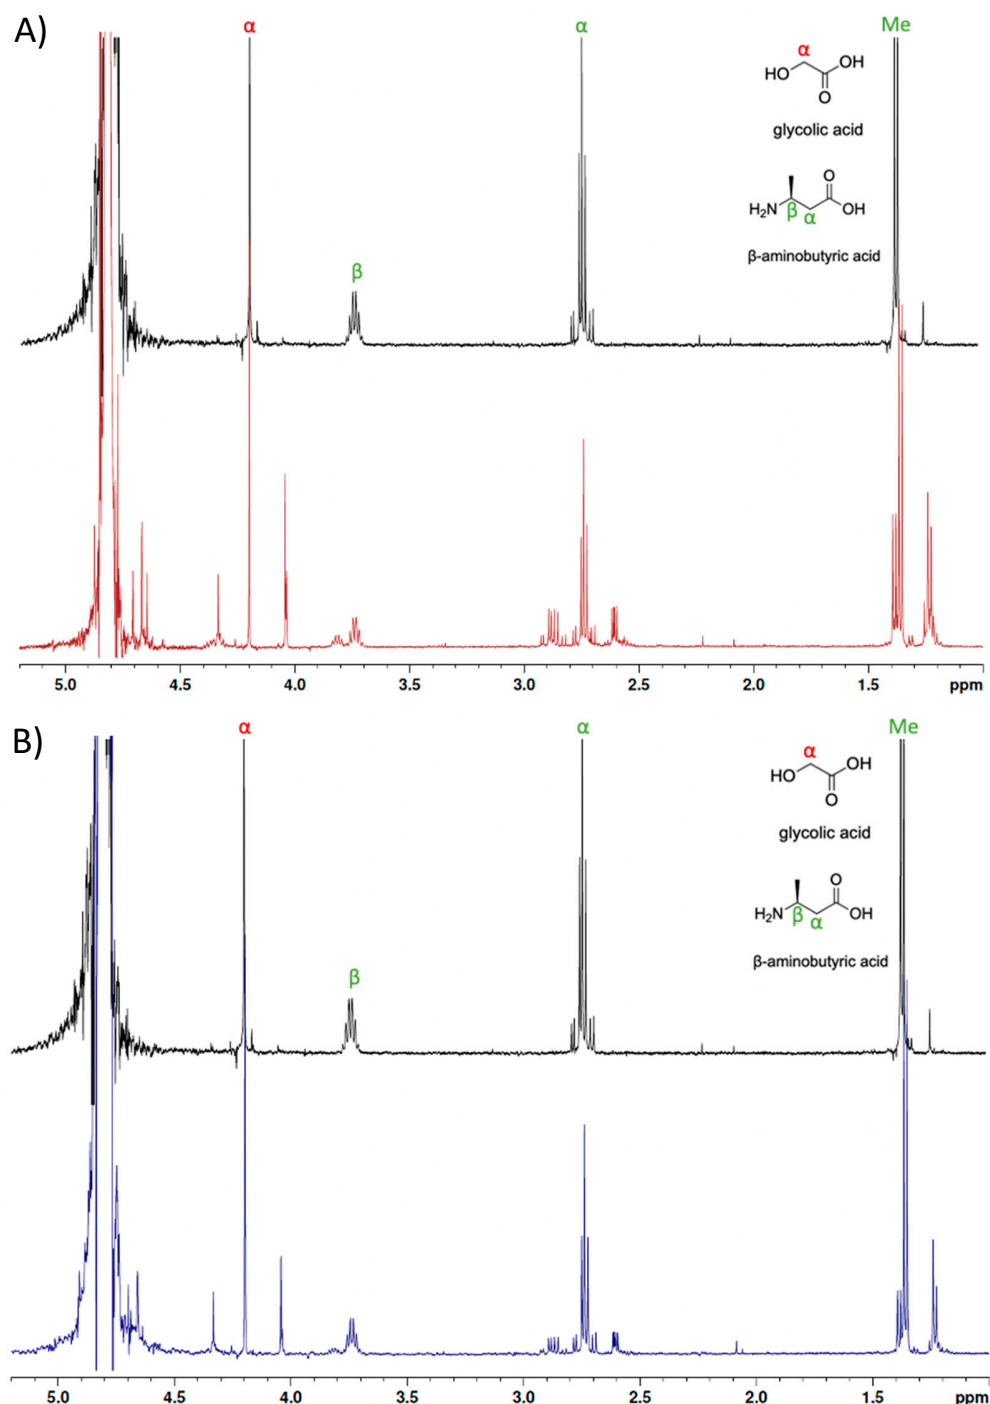

Figure S62.  $^1\text{H}$  NMR spectra exhibit the extent of depsipeptide formation upon (a) single-step dry-down reactions and (b) dry/wet cycling of glycolic acid (**glc**) and beta-

**aminobutyric acid ( $\beta$ -Aba).**  $^1\text{H}$  NMR spectra of a mixture of **glc** and  **$\beta$ -Aba** in  $\text{D}_2\text{O}$  before (black) and after single-step dry-down reactions at  $85^\circ\text{C}$  for seven days (red) show a 59.7% conversion of  **$\beta$ -Aba** into depsipeptide. In comparison, spectra after daily dry/wet cycling of 16 hr dry/8 hr wet for seven days (blue) show a conversion of 43.8%.  $\alpha$ -protons of **glc** are labeled in red; protons of  **$\beta$ -Aba** are labeled in green.

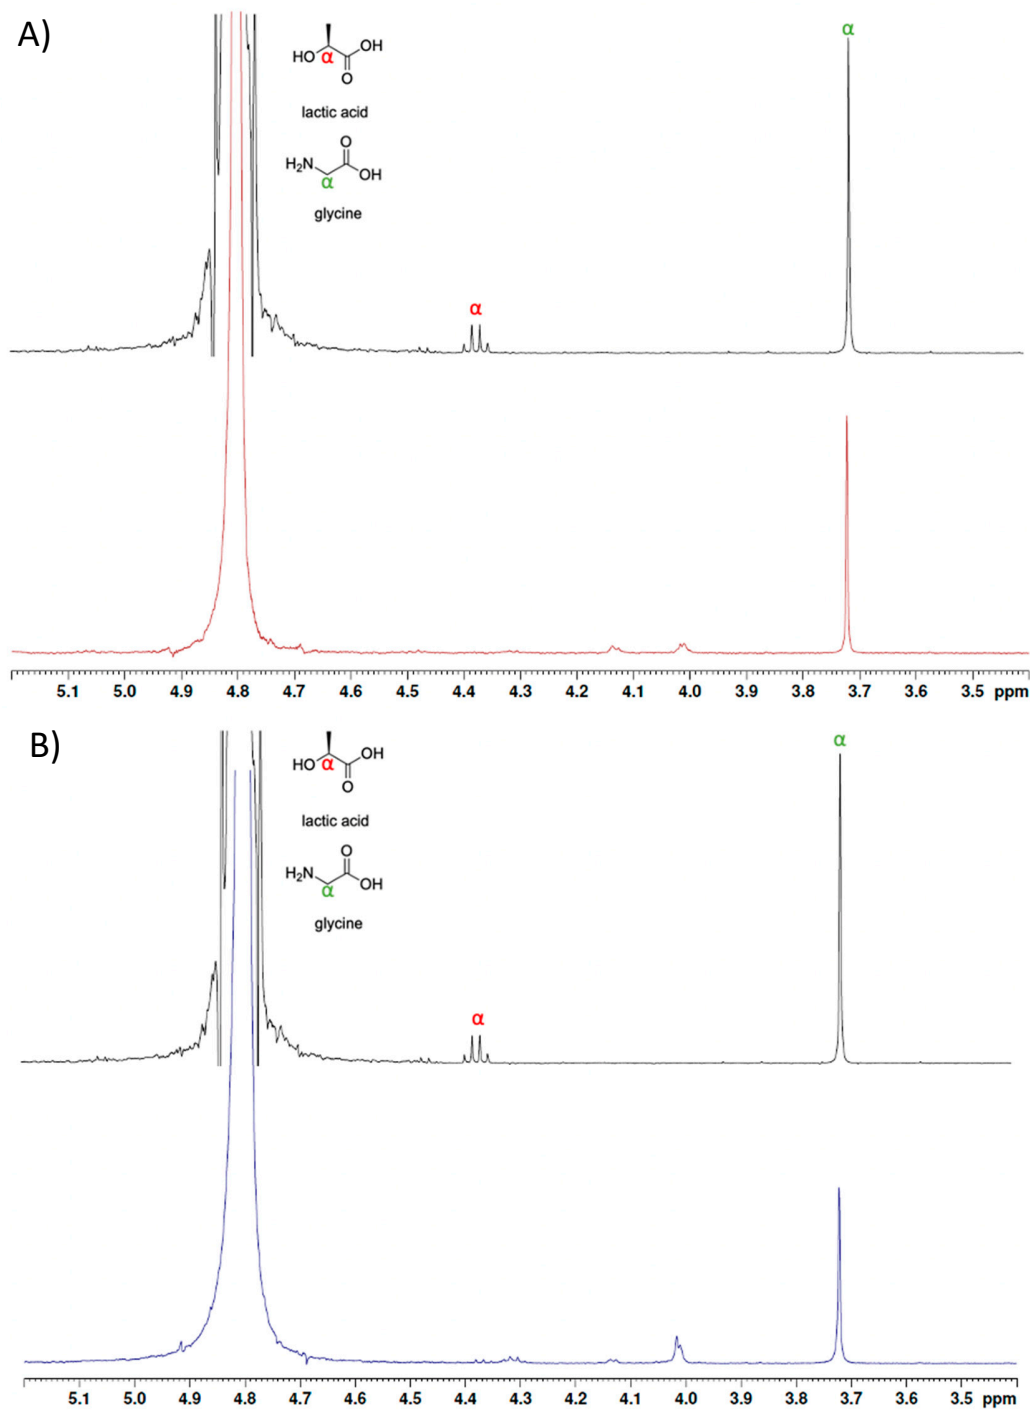

**Figure S63.  $^1\text{H}$  NMR spectra exhibit the extent of depsipeptide formation upon (a) single-step dry-down reactions and (b) dry/wet cycling of lactic acid (lac) and glycine (Gly).  $^1\text{H}$  NMR spectra of a mixture of lac and  $\beta\text{-Ala}$  in  $\text{D}_2\text{O}$  before (black) and after single-step dry-down reactions at  $85^\circ\text{C}$  for seven days (red) show a 34.7% conversion of Gly into depsipeptide. In comparison, spectra after daily dry/wet cycling of 16 hr dry/8 hr wet for seven days (blue) show a conversion of 43.8%.  $\alpha$ -protons of lac are labeled in red; protons of  $\beta\text{-Ala}$  are labeled in green.**

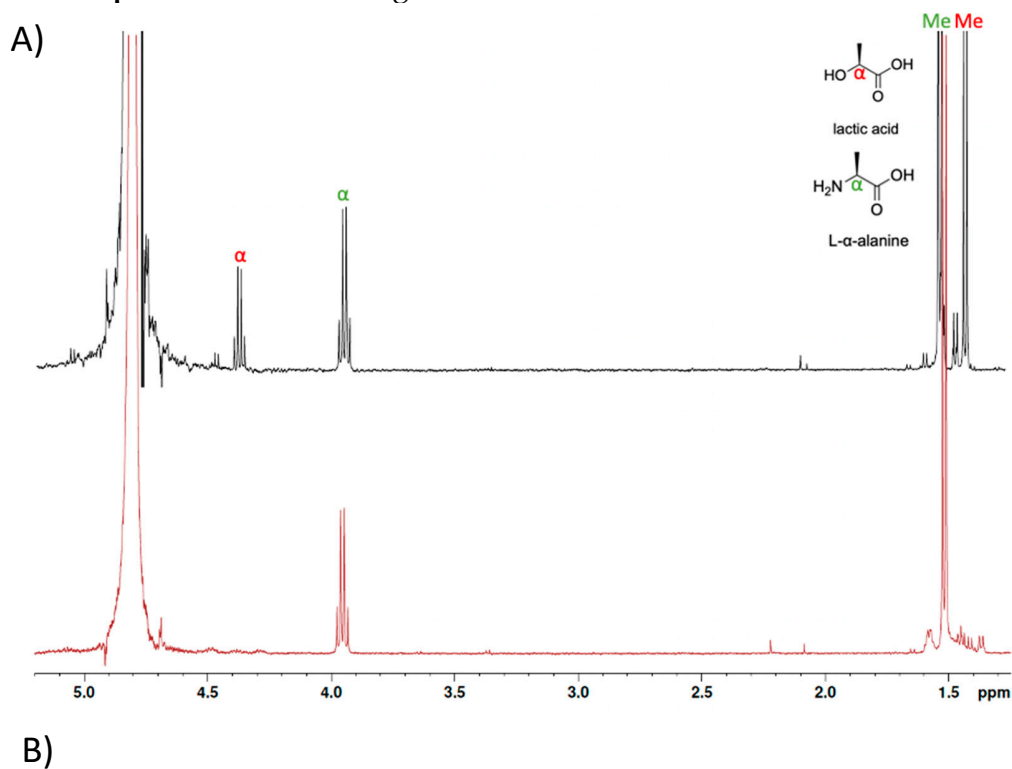

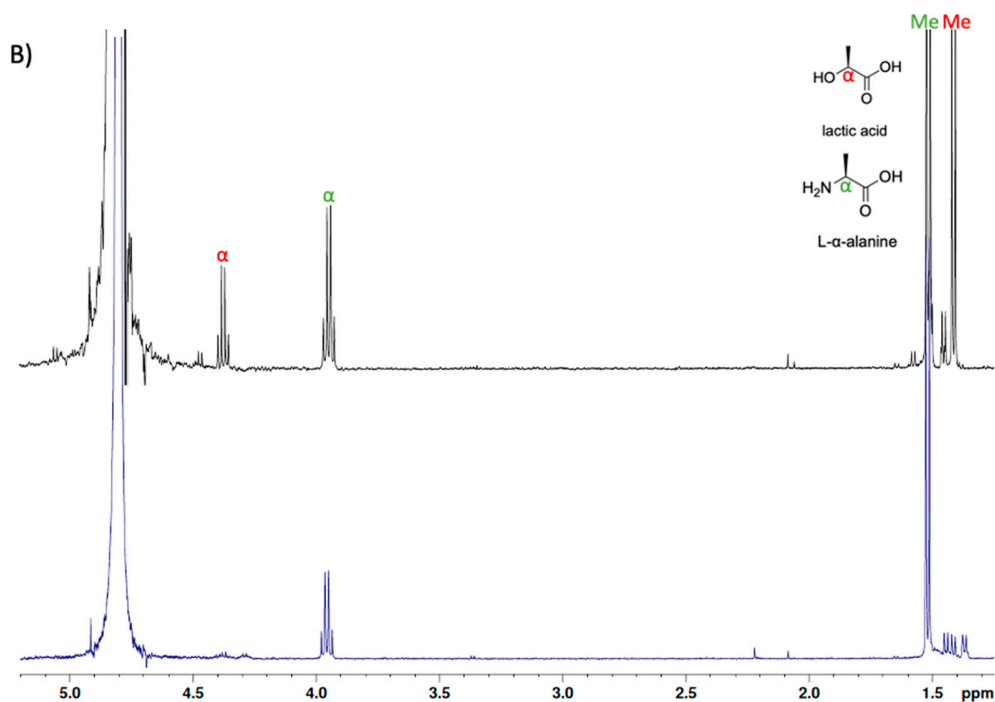

**Figure S64.**  $^1\text{H}$  NMR spectra exhibit the extent of depsipeptide formation upon (a) single-step dry-down reactions and (b) dry/wet cycling of lactic acid (**lac**) and alanine (**Ala**).  $^1\text{H}$  NMR spectra of a mixture of **lac** and **Ala** in  $\text{D}_2\text{O}$  before (black) and after single-step dry-down reactions at  $85^\circ\text{C}$  for seven days (red) show a 13.2% conversion of **Ala** into depsipeptide. In comparison, spectra after daily dry/wet cycling of 16 hr dry/8 hr wet for seven days (blue) show a conversion of 41.4%.  $\alpha$ -protons of **lac** are labeled in red;  $\alpha$ -proton of **Ala** is labeled in green.

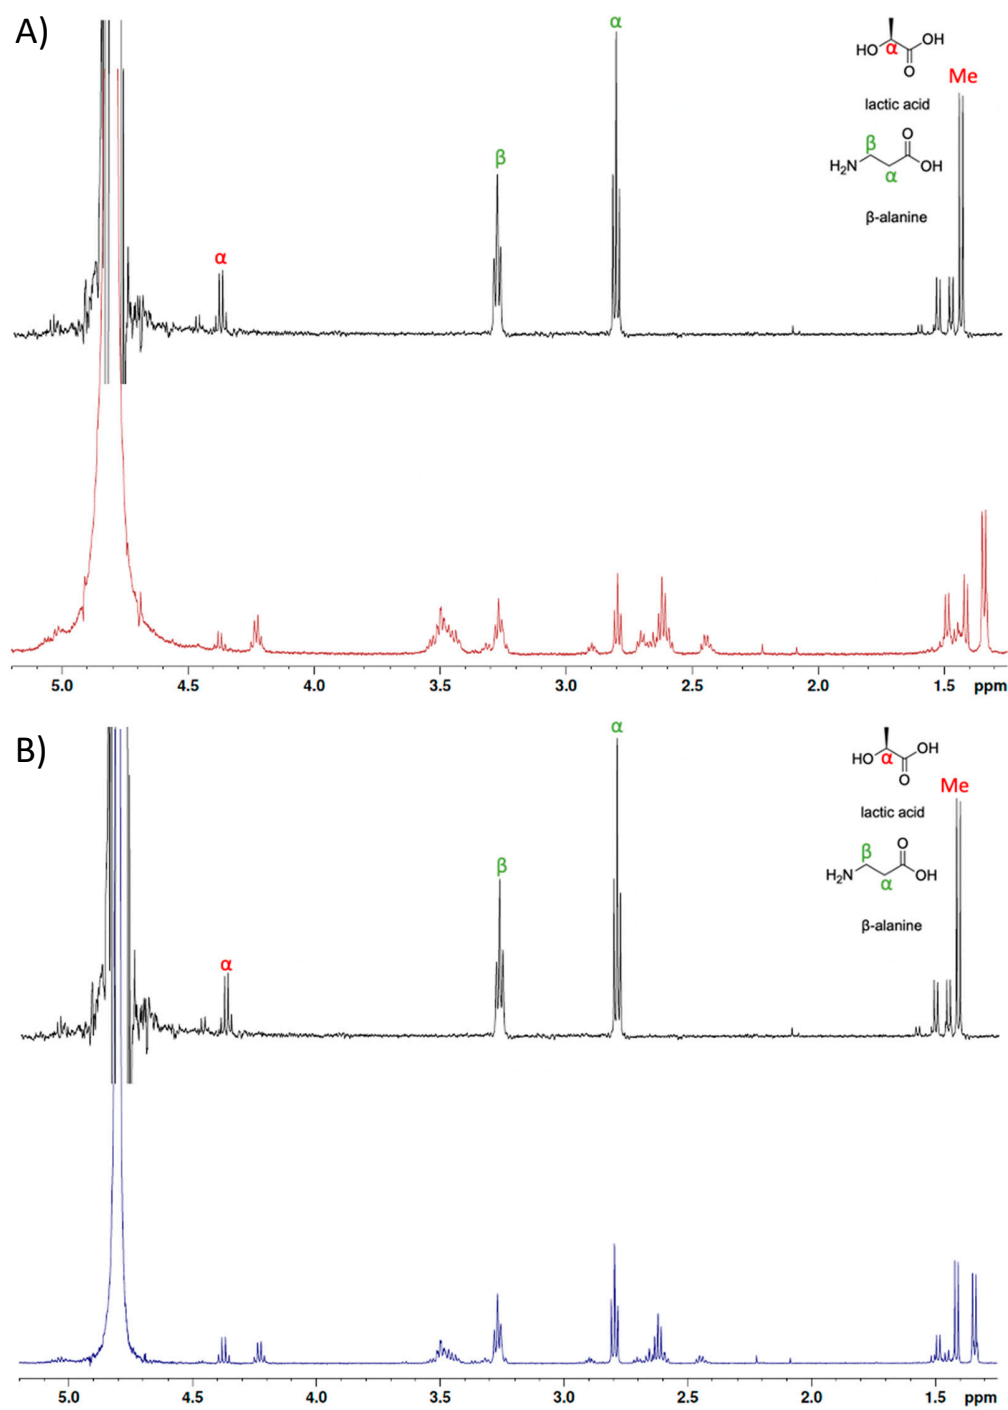

**Figure S65.**  $^1\text{H}$  NMR spectra exhibit the extent of depsipeptide formation upon (a) single-step dry-down reactions and (b) dry/wet cycling of lactic acid (lac) and  $\beta$ -alanine ( $\beta$ -Ala).  $^1\text{H}$  NMR spectra of a mixture of lac and  $\beta$ -Ala in  $\text{D}_2\text{O}$  before (black) and after single-step dry-down reactions at  $85^\circ\text{C}$  for seven days (red) show a 77.2% conversion of  $\beta$ -Ala into depsipeptide. In comparison, spectra after daily dry/wet cycling



of 16 hr dry/8 hr wet for seven days (blue) show a conversion of 59.7%.  $\alpha$ -protons of **lac** are labeled in red; protons of  $\beta$ -**Ala** are labeled in green.

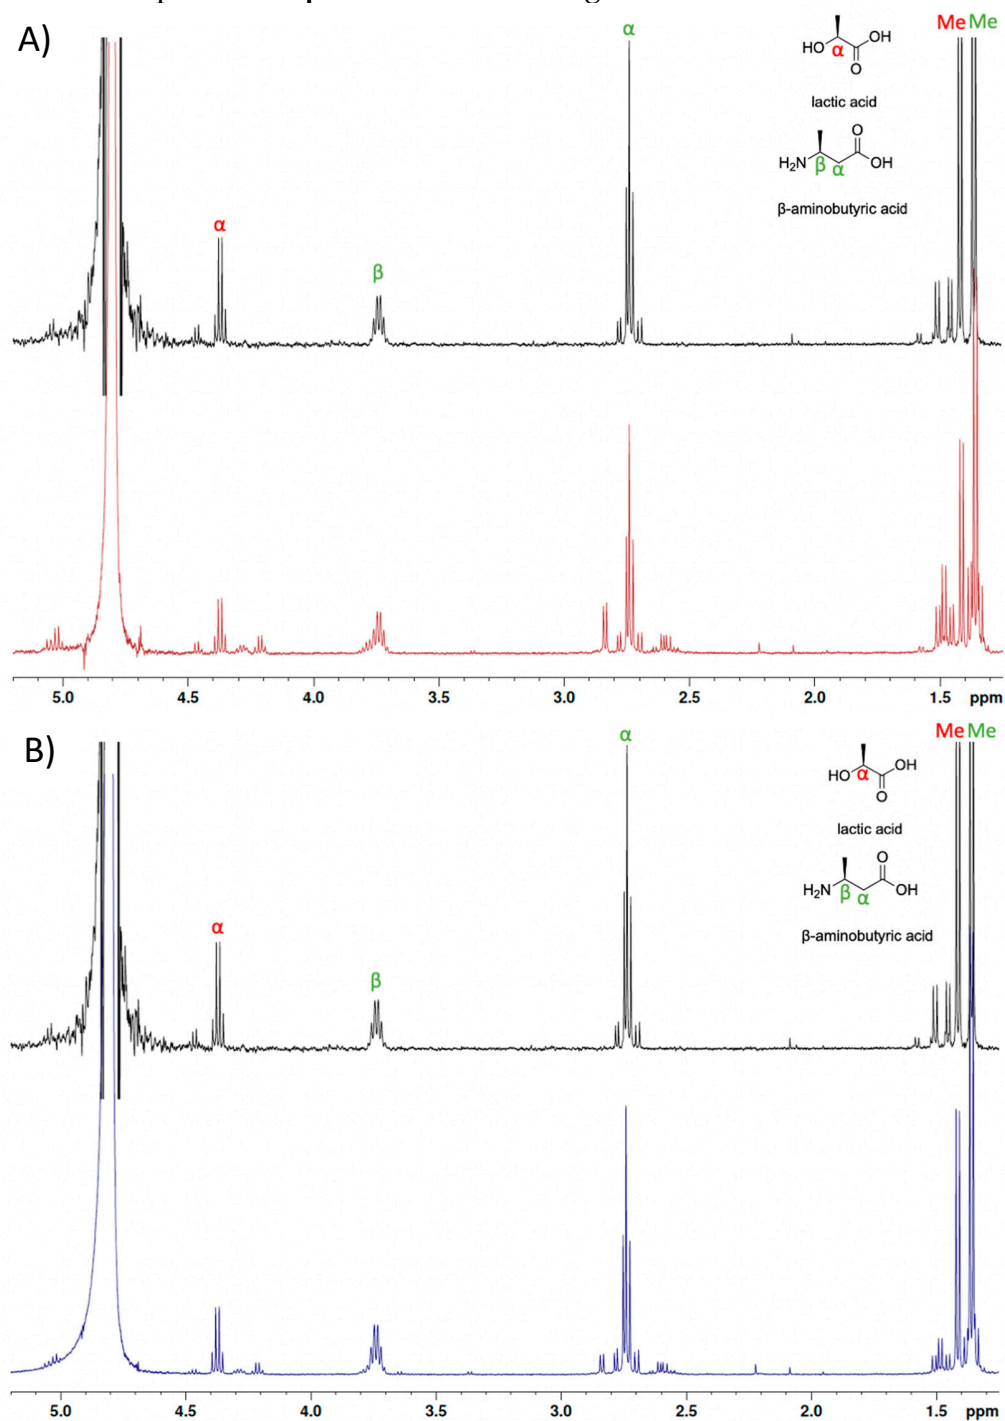

**Figure S66.**  $^1\text{H}$  NMR spectra exhibit the extent of depsipeptide formation upon (a) single-step dry-down reactions and (b) dry/wet cycling of lactic acid (**lac**) and beta-aminobutyric acid ( $\beta$ -**Aba**).  $^1\text{H}$  NMR spectra of a mixture of **lac** and  $\beta$ -**Aba** in  $\text{D}_2\text{O}$  before (black) and after single-step dry-down reactions at  $85^\circ\text{C}$  for seven days (red) show a

32.5% conversion of  $\beta$ -Aba into depsipeptide. In comparison, spectra after daily dry/wet cycling of 16 hr dry/8 hr wet for seven days (blue) show a conversion of 19.1%.  $\alpha$ -protons of **lac** are labeled in red; protons of  $\beta$ -Aba are labeled in green.

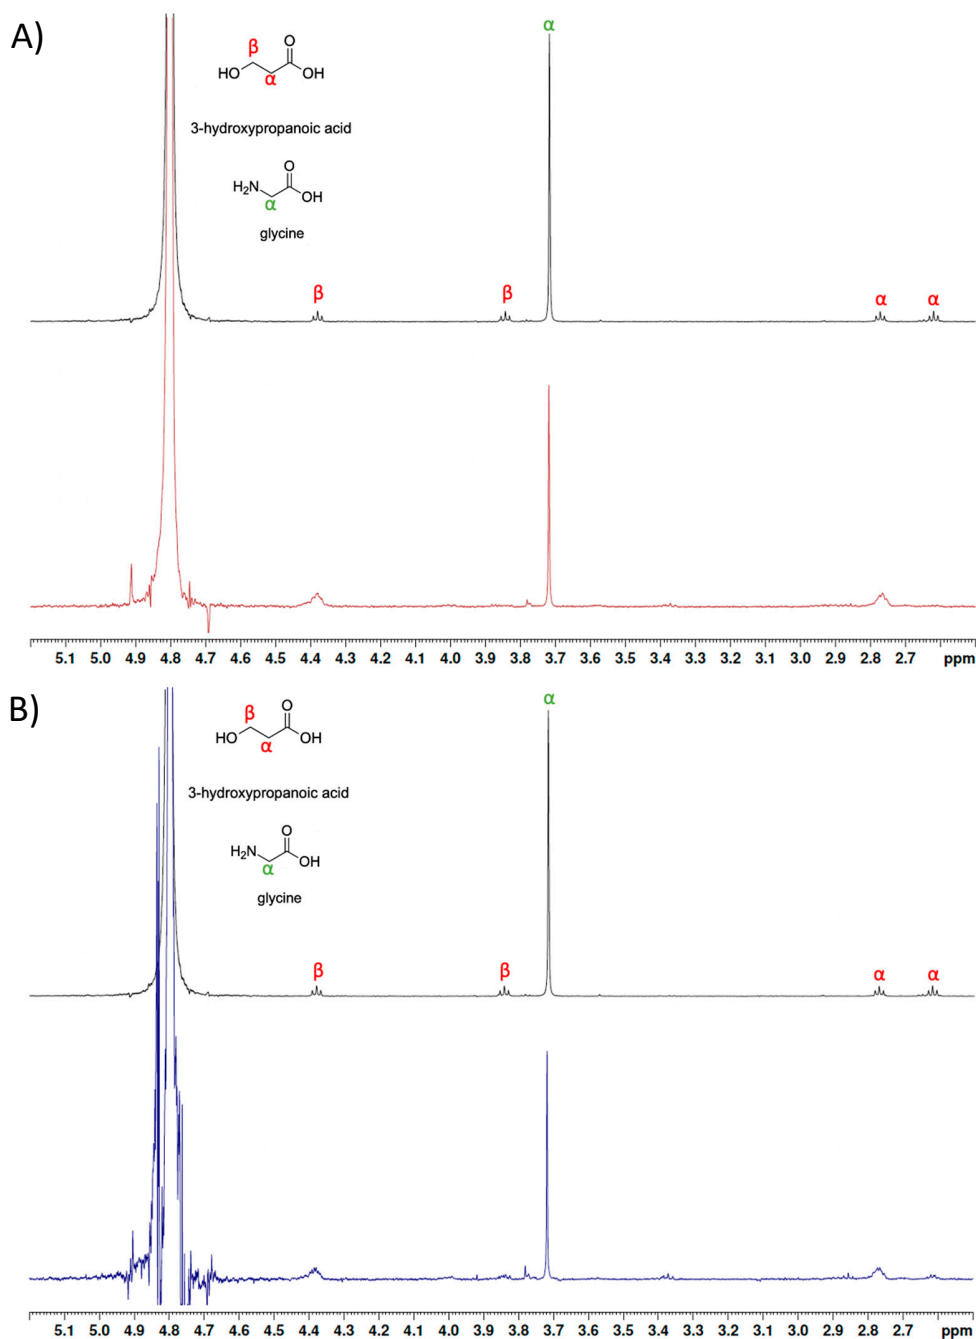

**Figure S67.**  $^1\text{H}$  NMR spectra exhibit the extent of depsipeptide formation upon (a) single-step dry-down reactions and (b) dry/wet cycling of 3-hydroxypropanoic acid (hpa) and glycine (Gly).  $^1\text{H}$  NMR spectra of a mixture of hpa and Gly in  $\text{D}_2\text{O}$  before (black) and after single-step dry-down reactions at  $85^\circ\text{C}$  for seven days (red) show a

28.8% conversion of **Gly** into depsipeptide. In comparison, spectra after daily dry/wet cycling of 16 hr dry/8 hr wet for seven days (blue) show a conversion of 29.9%. Protons of **hpa** are labeled in red;  $\alpha$ -protons of **Gly** are labeled in green.

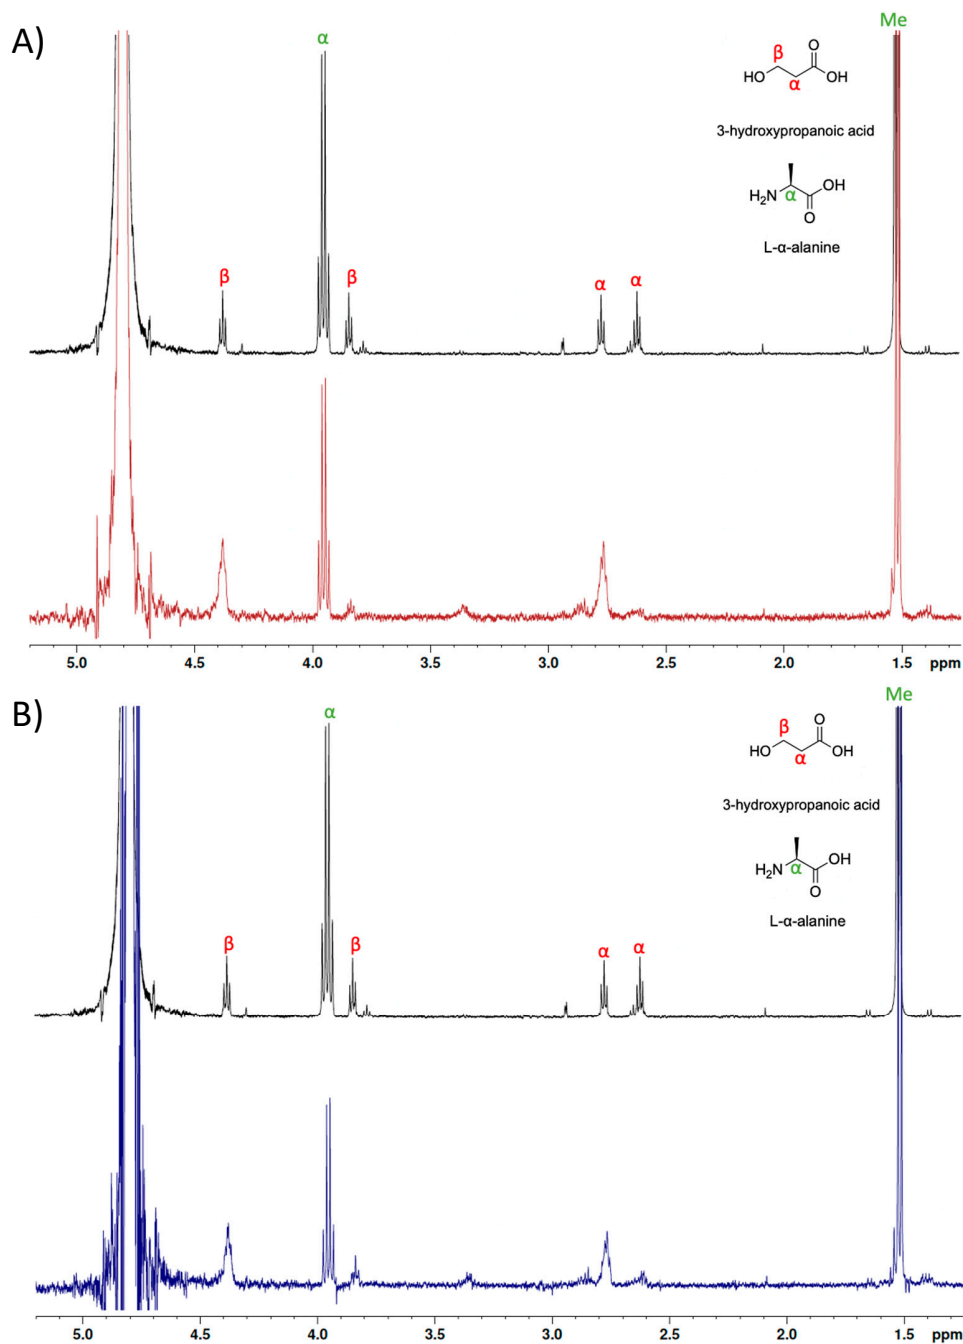

**Figure S68.**  $^1\text{H}$  NMR spectra exhibit the extent of depsipeptide formation upon (a) single-step dry-down reactions and (b) dry/wet cycling of 3-hydroxypropanoic acid (hpa) and alanine (Ala).  $^1\text{H}$  NMR spectra of a mixture of hpa and Ala in  $\text{D}_2\text{O}$  before (black) and after single-step dry-down reactions at 85 °C for seven days (red) show a

13.1% conversion of **Ala** into depsipeptide. In comparison, spectra after daily dry/wet cycling of 16 hr dry/8 hr wet for seven days (blue) show a conversion of 28.2%. Protons of **hpa** are labeled in red;  $\alpha$ -proton of **Ala** is labeled in green.

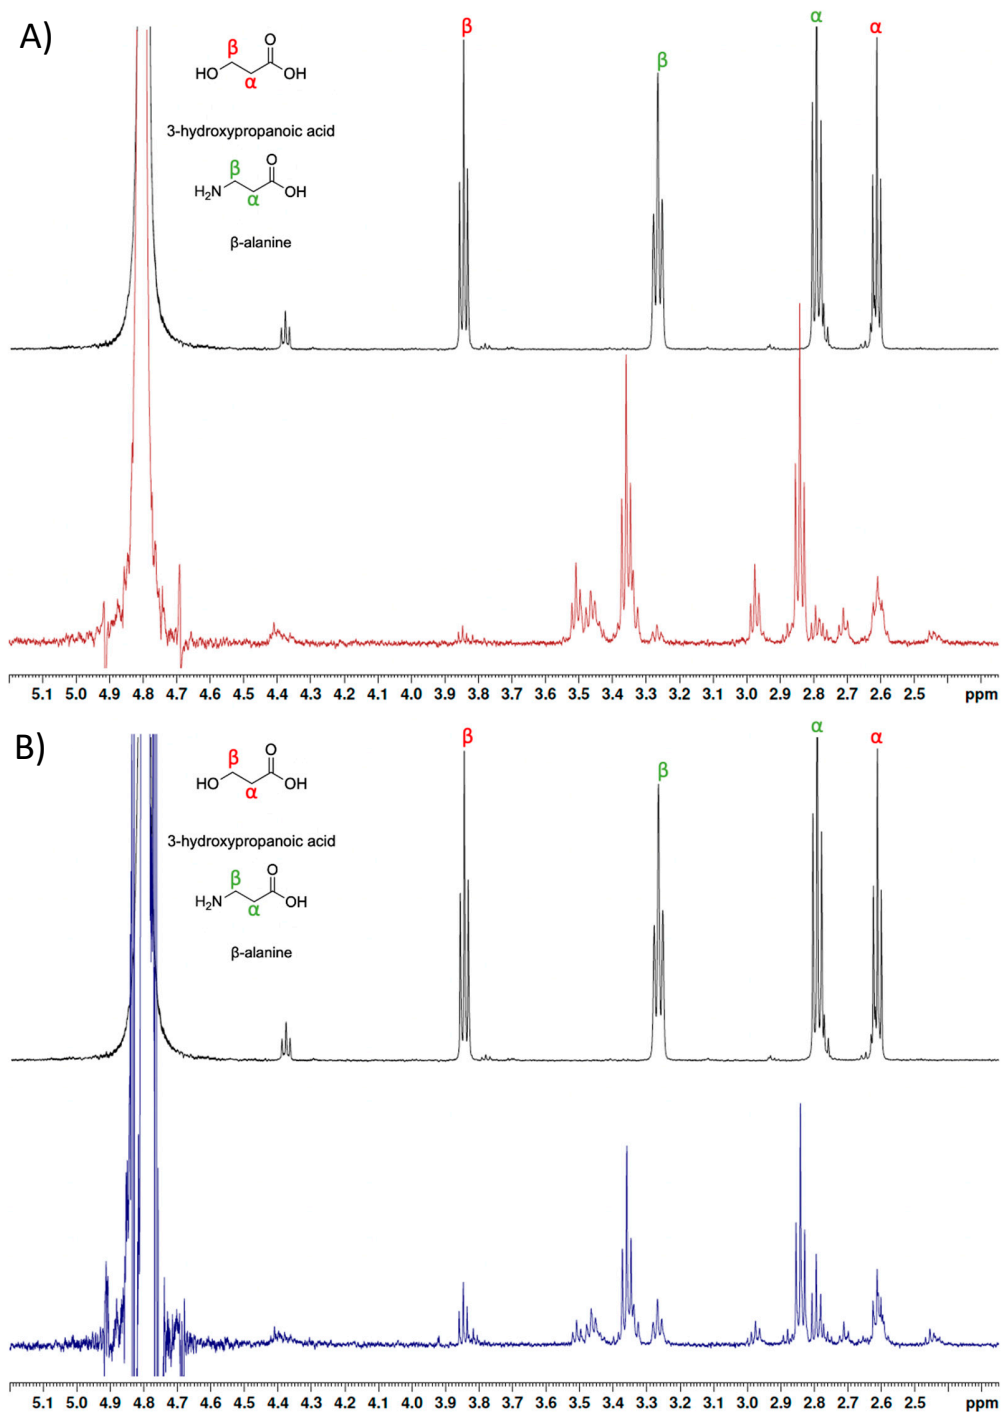

**Figure S69.**  $^1\text{H}$  NMR spectra exhibit the extent of depsipeptide formation upon (a) single-step dry-down reactions and (b) dry/wet cycling of 3-hydroxypropanoic acid (hpa) and beta-alanine ( $\beta$ -Ala).  $^1\text{H}$  NMR spectra of a mixture of hpa and  $\beta$ -Ala in  $\text{D}_2\text{O}$  before (black) and after single-step dry-down reactions at  $85^\circ\text{C}$  for seven days (red) show a 94.1% conversion of  $\beta$ -Ala into depsipeptide. In comparison, spectra after daily dry/wet cycling of 16 hr dry/8 hr wet for seven days (blue) show a conversion of 79.1%. Protons of hpa are labeled in red; protons of  $\beta$ -Ala are labeled in green.

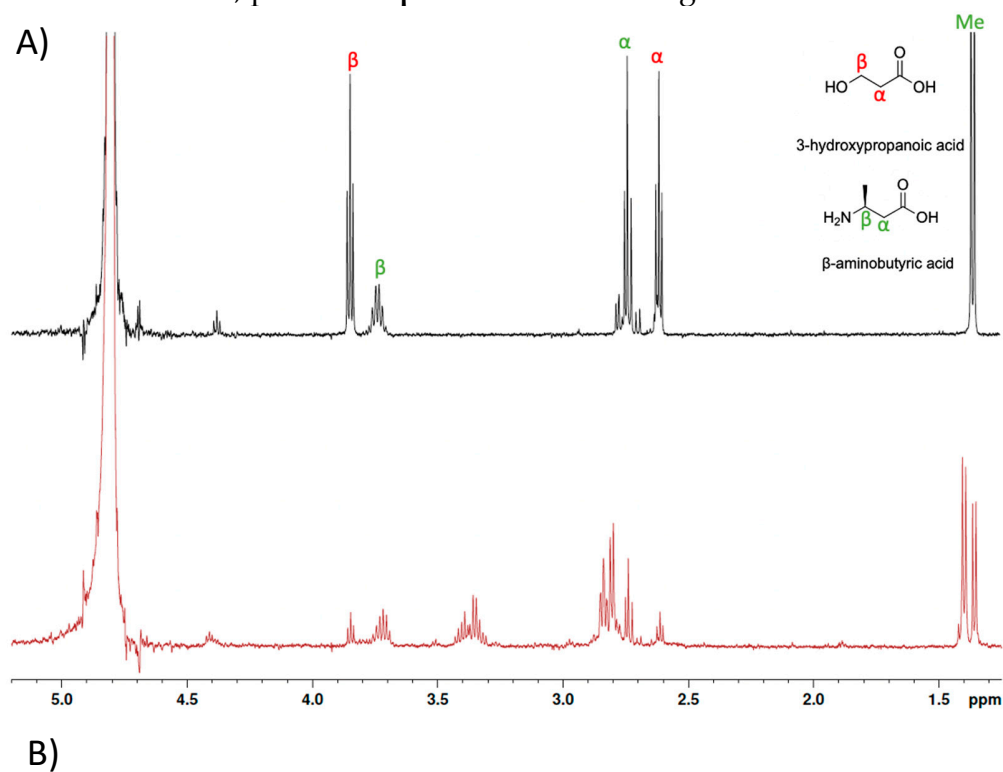

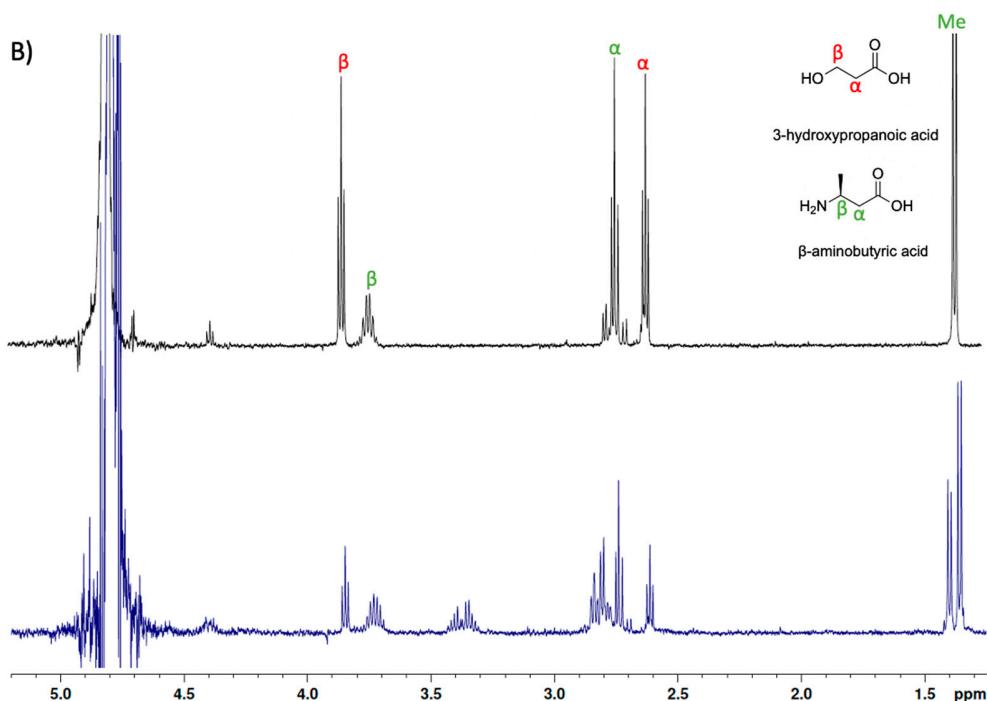

**Figure S70.**  $^1\text{H}$  NMR spectra exhibit the extent of depsipeptide formation upon (a) single-step dry-down reactions and (b) dry/wet cycling of 3-hydroxypropanoic acid (hpa) and beta-aminobutyric acid ( $\beta$ -Aba).  $^1\text{H}$  NMR spectra of a mixture of hpa and  $\beta$ -Aba in  $\text{D}_2\text{O}$  before (black) and after single-step dry-down reactions at  $85^\circ\text{C}$  for seven days (red) show a 72.3% conversion of  $\beta$ -Aba into depsipeptide. In comparison, spectra after daily dry/wet cycling of 16 hr dry/8 hr wet for seven days (blue) show a conversion of 62.9%. Protons of hpa are labeled in red; protons of  $\beta$ -Aba are labeled in green.

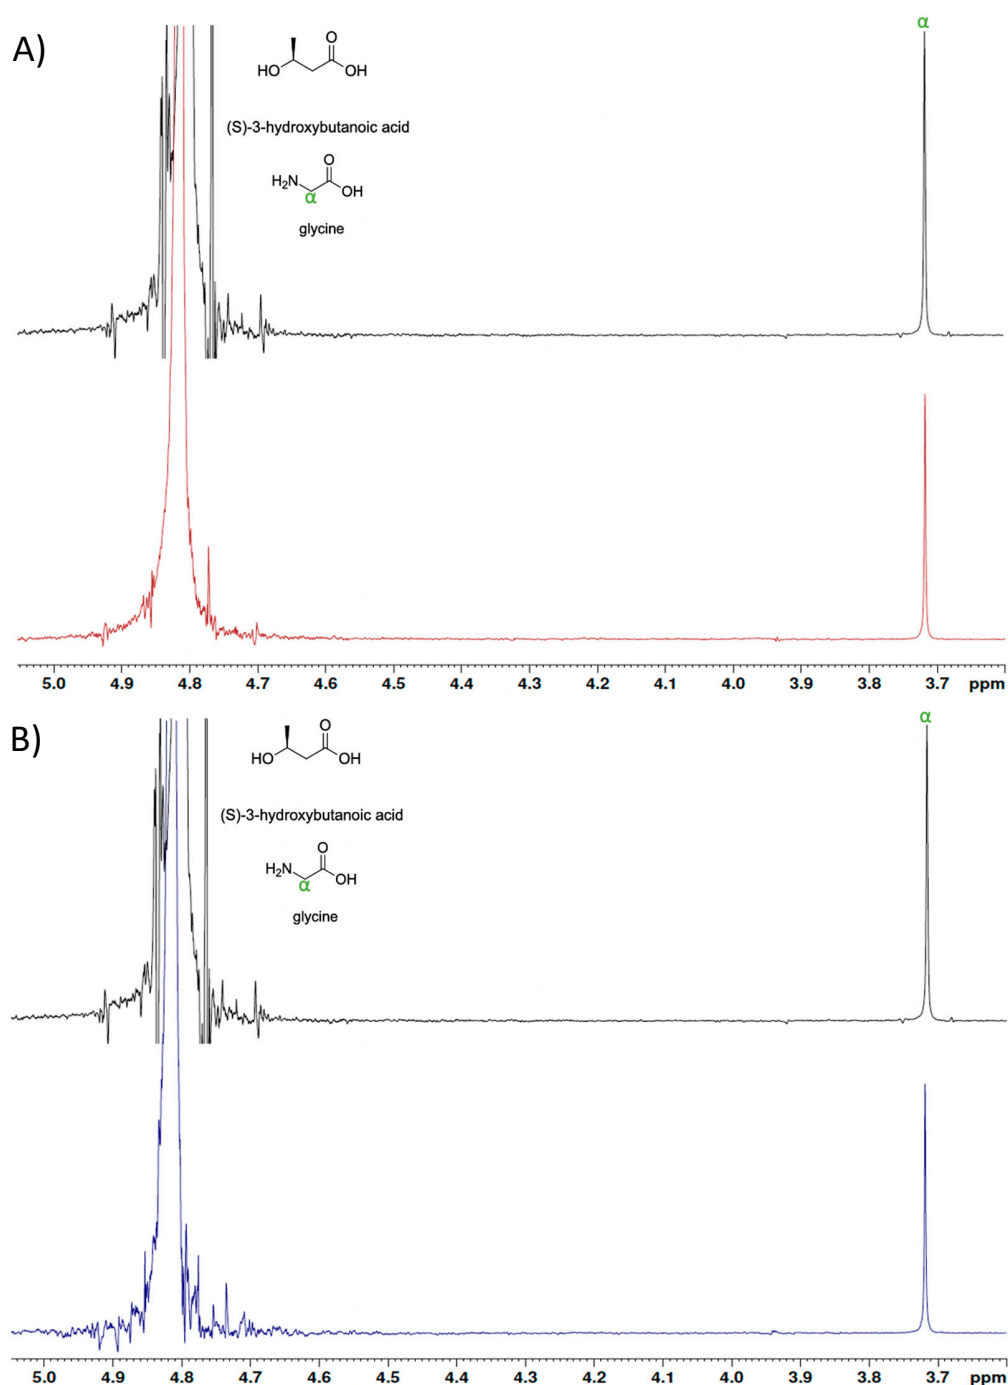

**Figure S71.**  $^1\text{H}$  NMR spectra exhibit the extent of depsipeptide formation upon (a) single-step dry-down reactions and (b) dry/wet cycling of 3-hydroxybutanoic acid (hba) and glycine (Gly).  $^1\text{H}$  NMR spectra of a mixture of hba and Gly in  $\text{D}_2\text{O}$  before (black) and after single-step dry-down reactions at  $85^\circ\text{C}$  for seven days (red) show a 16.3% conversion of Gly into depsipeptide. In comparison, spectra after daily dry/wet cycling of 16 hr dry/8 hr wet for seven days (blue) show a conversion of 19.2%.  $\alpha$ -protons

of **Gly** are labeled in green. **hba** was completely lost during lyophilization, which is carried out prior to the NMR analysis.

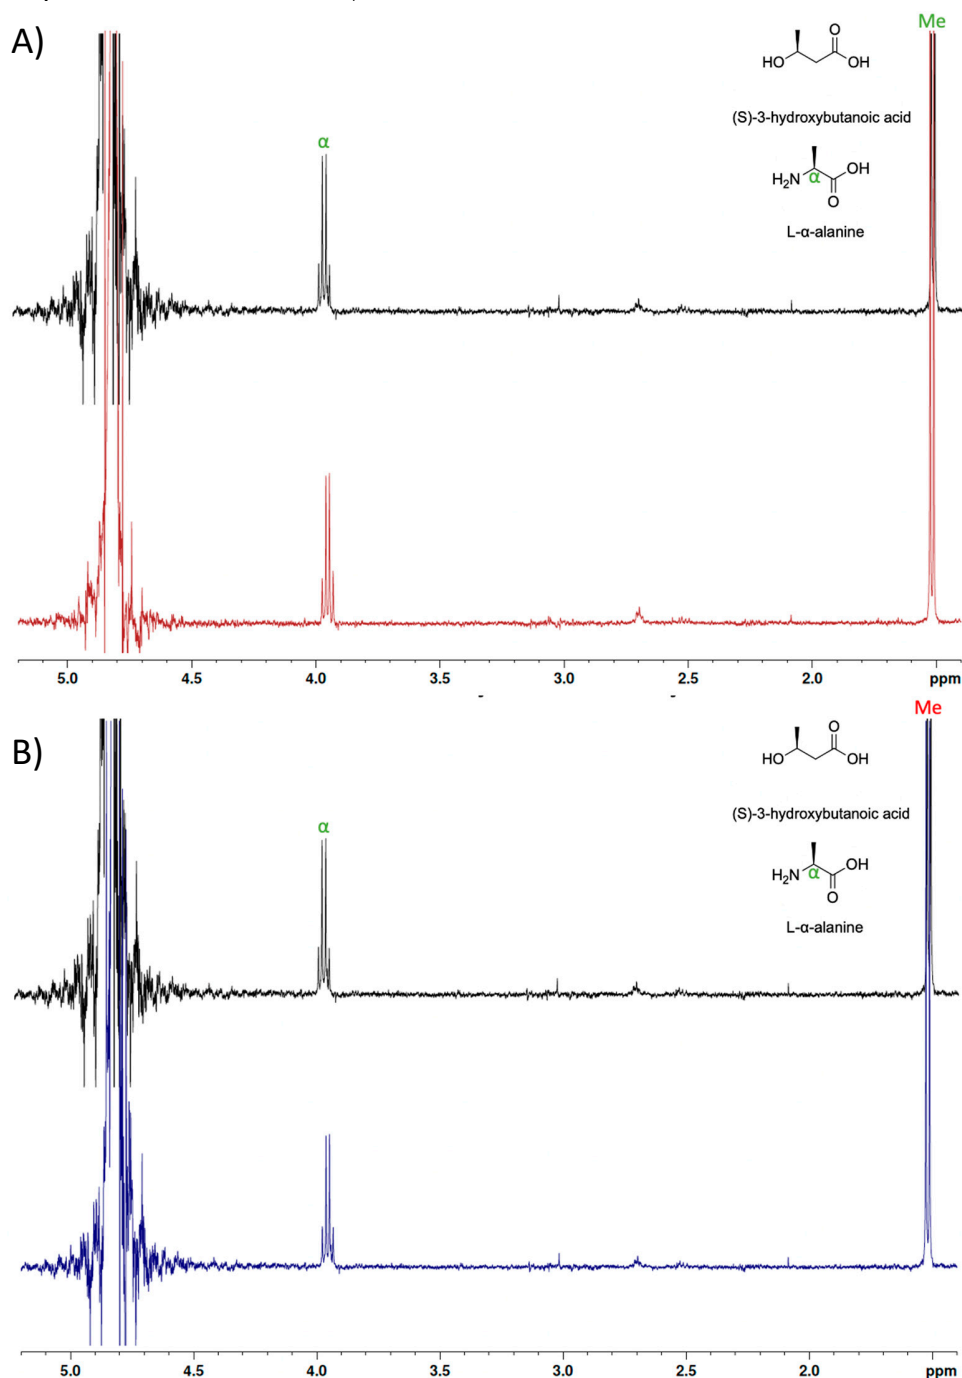

**Figure S72.**  $^1\text{H}$  NMR spectra exhibit the extent of depsipeptide formation upon (a) single-step dry-down reactions and (b) dry/wet cycling of 3-hydroxybutanoic acid (**hba**) and alanine (**Ala**).  $^1\text{H}$  NMR spectra of a mixture of **hba** and **Ala** in  $\text{D}_2\text{O}$  before (black) and after single-step dry-down reactions at 85 °C for seven days (red) show an 8.1% conversion of **Ala** into depsipeptide. In comparison, spectra after daily dry/wet



cycling of 16 hr dry/8 hr wet for seven days (blue) show a conversion of 29.5%. Protons of **hba** are labeled in red;  $\alpha$ -proton of **Ala** is labeled in green. **hba** was completely lost during lyophilization, which is carried out prior to the NMR analysis.

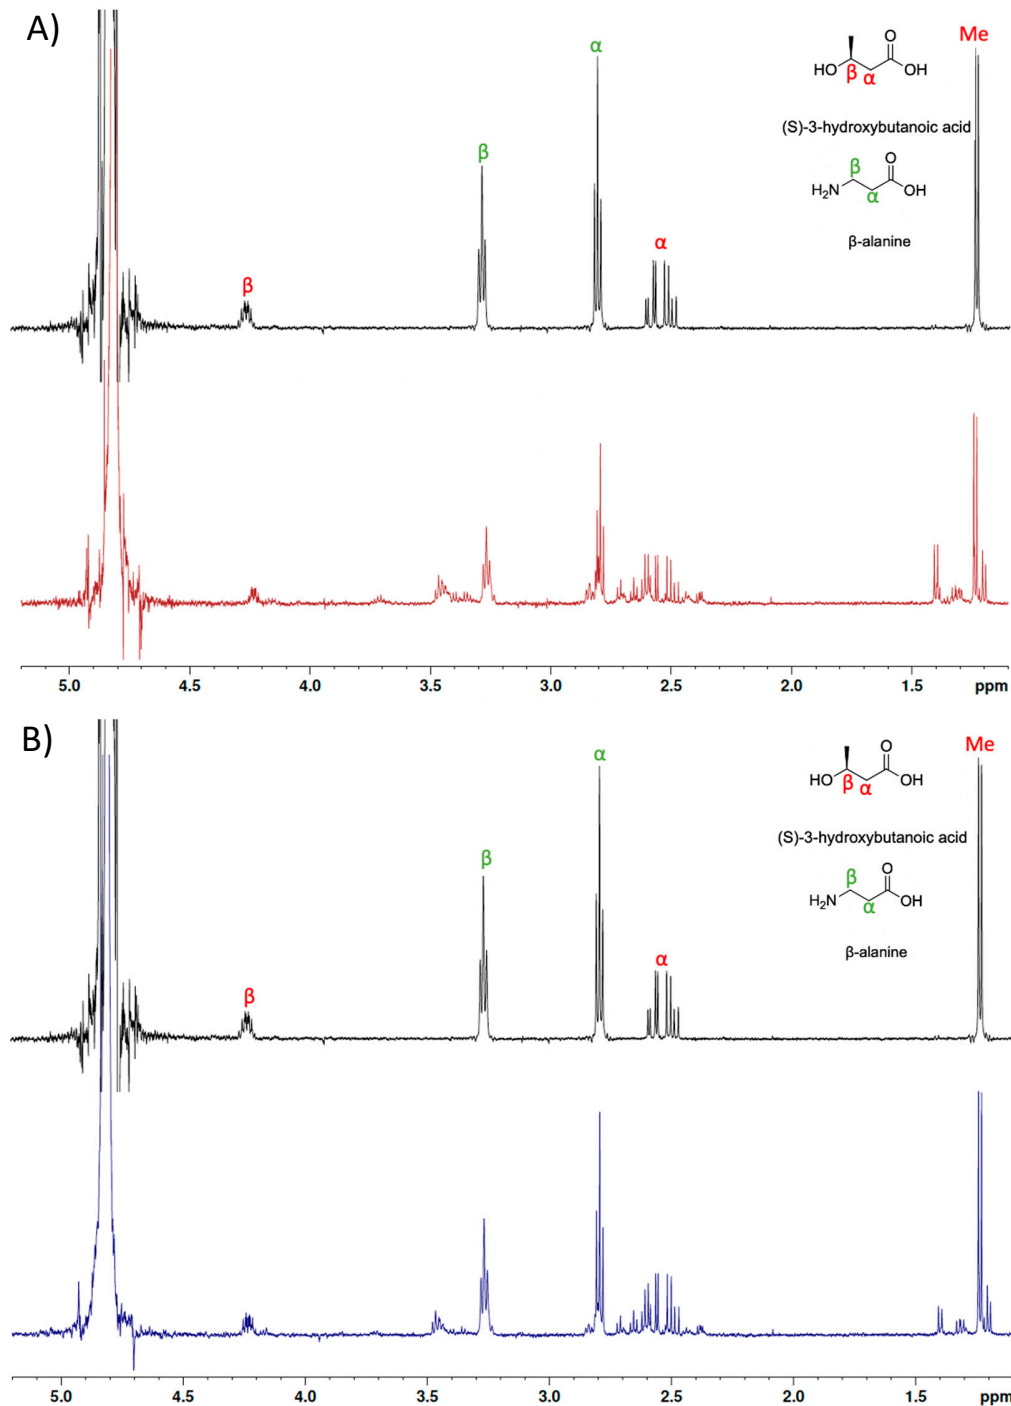

Figure S73.  $^1\text{H}$  NMR spectra exhibit the extent of depsipeptide formation upon (a) single-step dry-down reactions and (b) dry/wet cycling of 3-hydroxybutanoic acid (**hba**) and beta-alanine ( $\beta$ -Ala).  $^1\text{H}$  NMR spectra of a mixture of **hba** and  $\beta$ -Ala in  $\text{D}_2\text{O}$

before (black) and after single-step dry-down reactions at 85 °C for seven days (red) show a 62.2% conversion of  $\beta$ -Ala into depsipeptide. In comparison, spectra after daily dry/wet cycling of 16 hr dry/8 hr wet for seven days (blue) show a conversion of 40.2%. Protons of **hba** are labeled in red; protons of  $\beta$ -Ala are labeled in green.

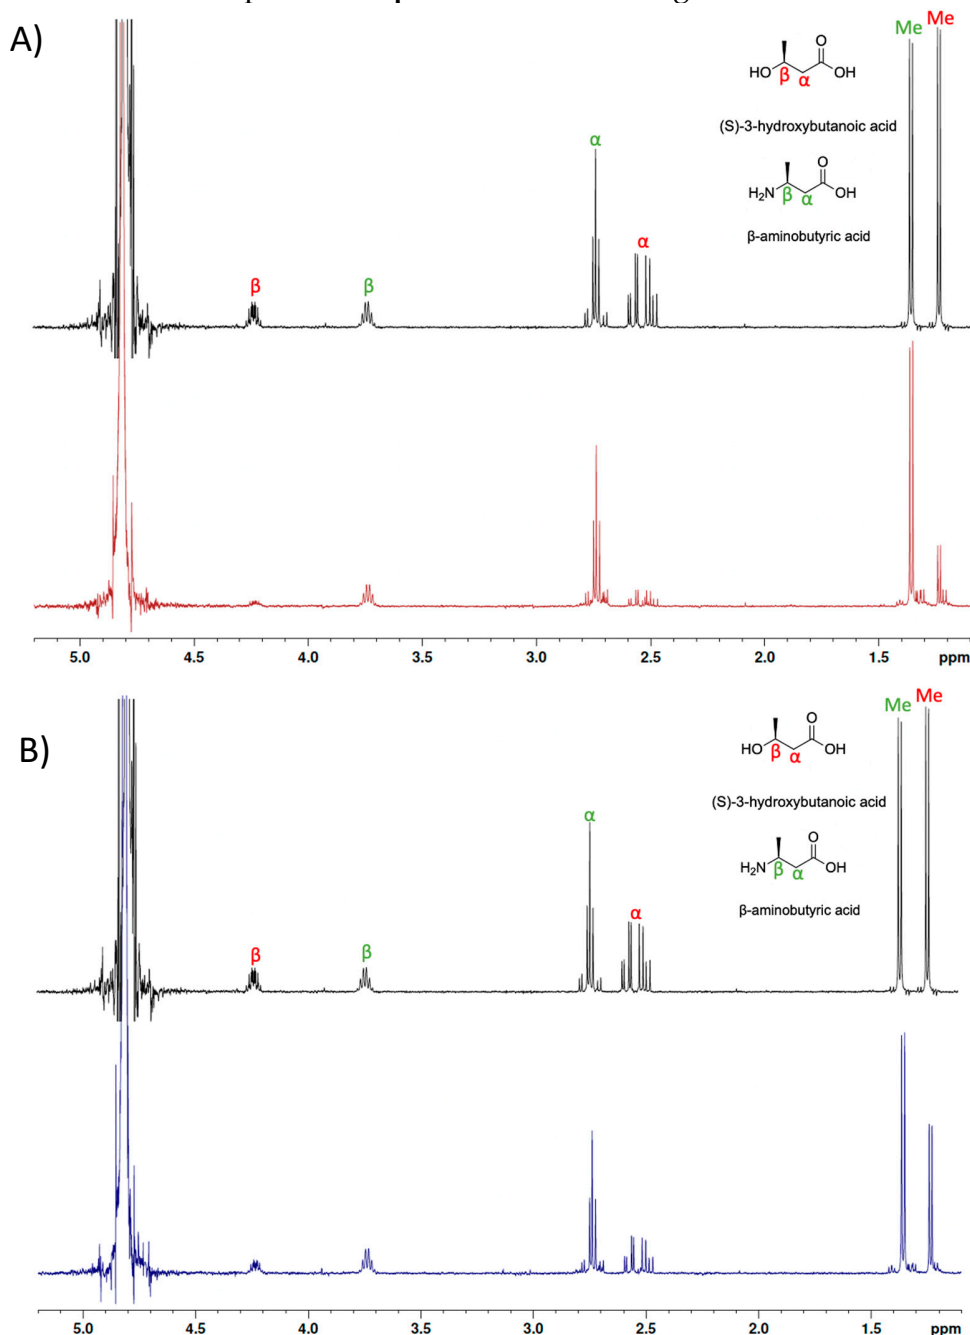

**Figure S74.**  $^1\text{H}$  NMR spectra exhibit the extent of depsipeptide formation upon (a) single-step dry-down reactions and (b) dry/wet cycling of 3-hydroxybutanoic acid (**hba**) and beta-aminobutyric acid ( $\beta$ -Aba).  $^1\text{H}$  NMR spectra of a mixture of **hba** and  $\beta$ -Aba in  $\text{D}_2\text{O}$  before (black) and after single-step dry-down reactions at 85 °C for seven

days (red) show a 3.8% conversion of  $\beta$ -**Aba** into depsipeptide. In comparison, spectra after daily dry/wet cycling of 16 hr dry/8 hr wet for seven days (blue) show a conversion of 11.2%. Protons of **hba** are labeled in red; protons of  $\beta$ -**Aba** are labeled in green.

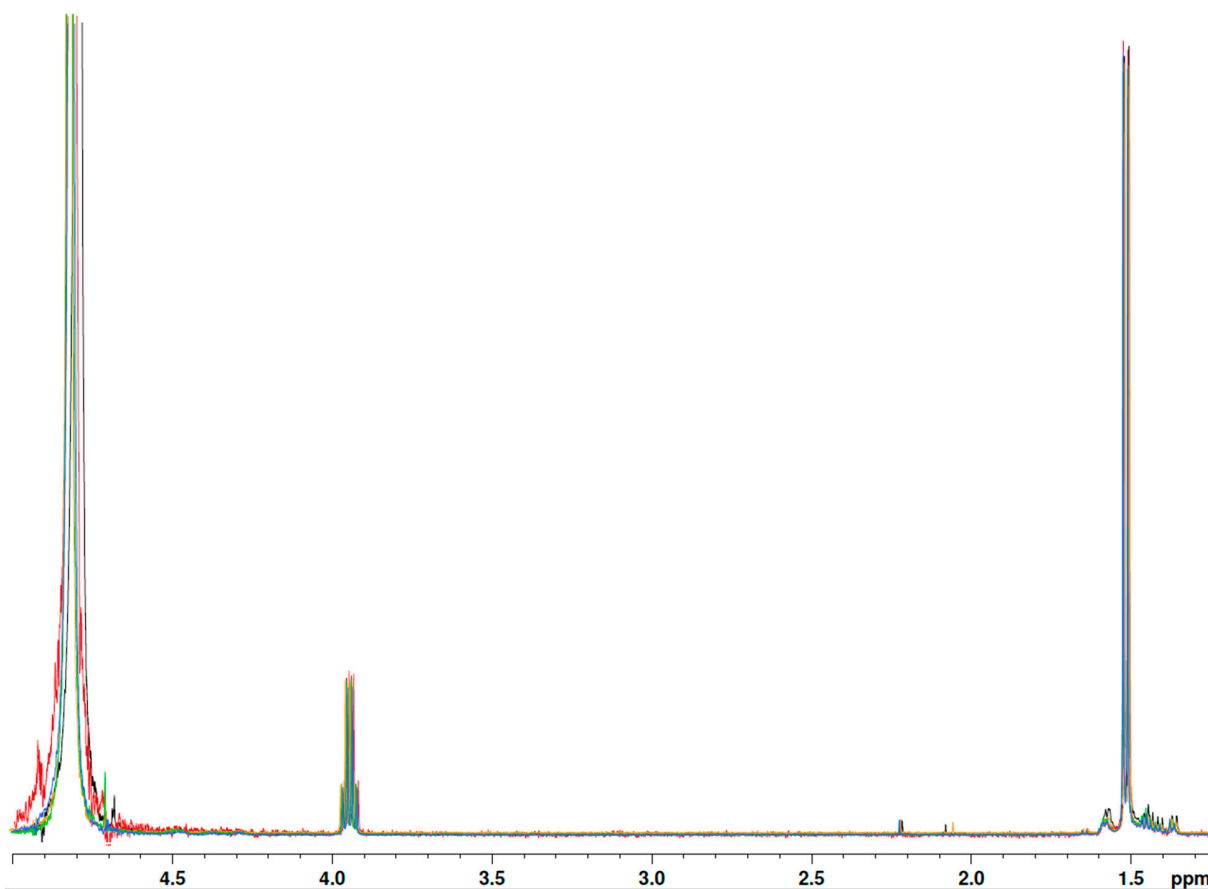

**Figure S75. <sup>1</sup>H NMR spectra of replicates of lactic acid (lac) and alanine (Ala) single-step dry-down reactions confirms reproducibility of extent of amino acid conversion.** <sup>1</sup>H NMR spectra of four independent replicates following single-step dry-down reactions of **lac** and **Ala** for seven days at 85°C confirms reproducibility of observed percent conversion (standard deviation  $\pm 3.48$  %).

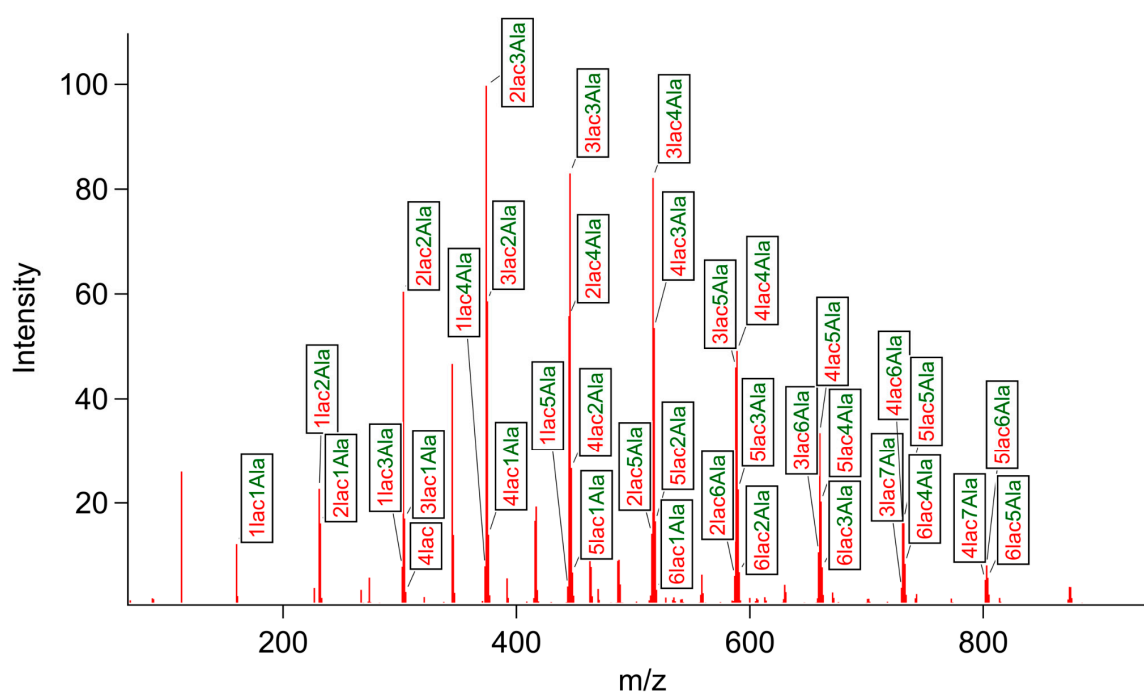

**Figure S76. ESI-MS of the last cycle in the extended dry/wet cycling reaction of lactic acid (lac) and alanine (Ala) supports the formation of depsipeptides.** lac and Ala were subjected to weekly dry/wet cycles (4 days dry/3 days wet) at 85 °C for 8 weeks and the resulting depsipeptides from the last cycle (C8) were analyzed by negative-mode ESI-MS, indicating a variety of depsipeptides. **lac** is labeled in red; **Ala** is labeled in green. All labeled species correspond to  $[M-H]^-$  ions.

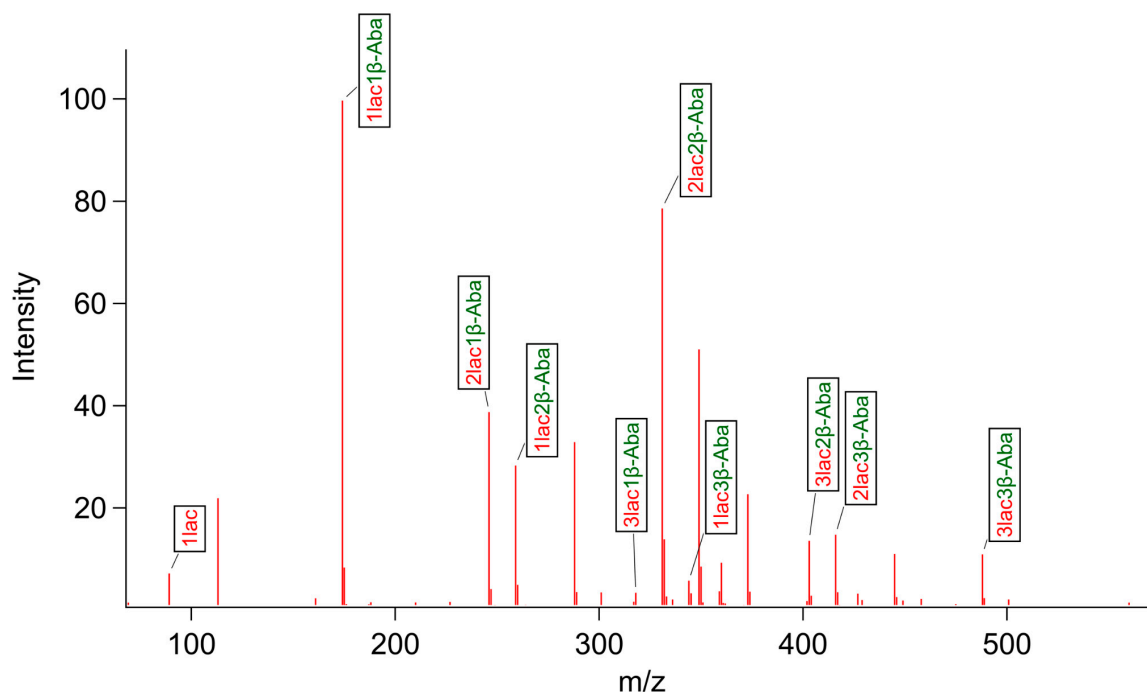

**Figure S77. ESI-MS of the last cycle in the extended dry/wet cycling reaction of lactic acid (lac) and  $\beta$ -aminobutyric acid ( $\beta$ -Aba) supports the formation of depsipeptides. lac and  $\beta$ -Aba were subjected to weekly dry/wet cycles (4 days dry/3 days wet) at 85 °C for 8 weeks and the resulting depsipeptides from the last cycle (C8) were analyzed by negative-mode ESI-MS, indicating a variety of depsipeptides. lac is labeled in red;  $\beta$ -Aba is labeled in green. All labeled species correspond to  $[M-H]^-$  ions.**

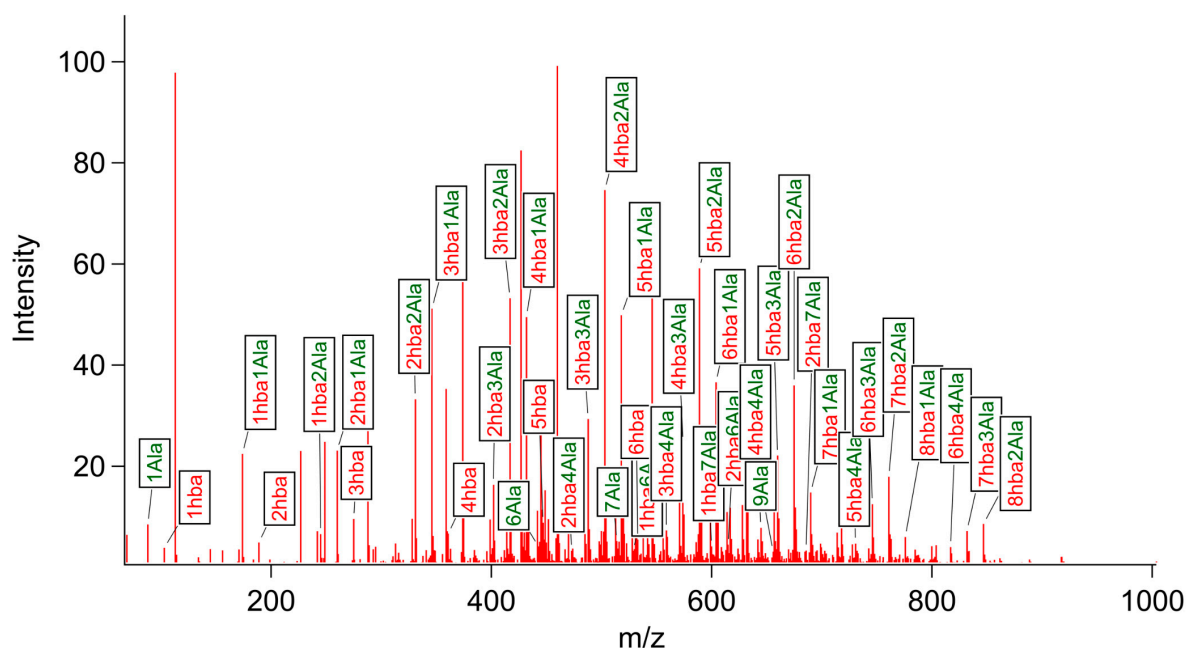

**Figure S78. ESI-MS of the last cycle in the extended dry/wet cycling reaction of 3-hydroxybutanoic acid (hba) and alanine (Ala) supports the formation of depsipeptides.** **hba** and **Ala** were subjected to weekly dry/wet cycles (4 days dry/3 days wet) at 85 °C for 8 weeks and the resulting depsipeptides from the last cycle (C8) were analyzed by negative-mode ESI-MS, indicating a variety of depsipeptides. **hba** is labeled in red; **Ala** is labeled in green. All labeled species correspond to  $[M-H]^-$  ions.

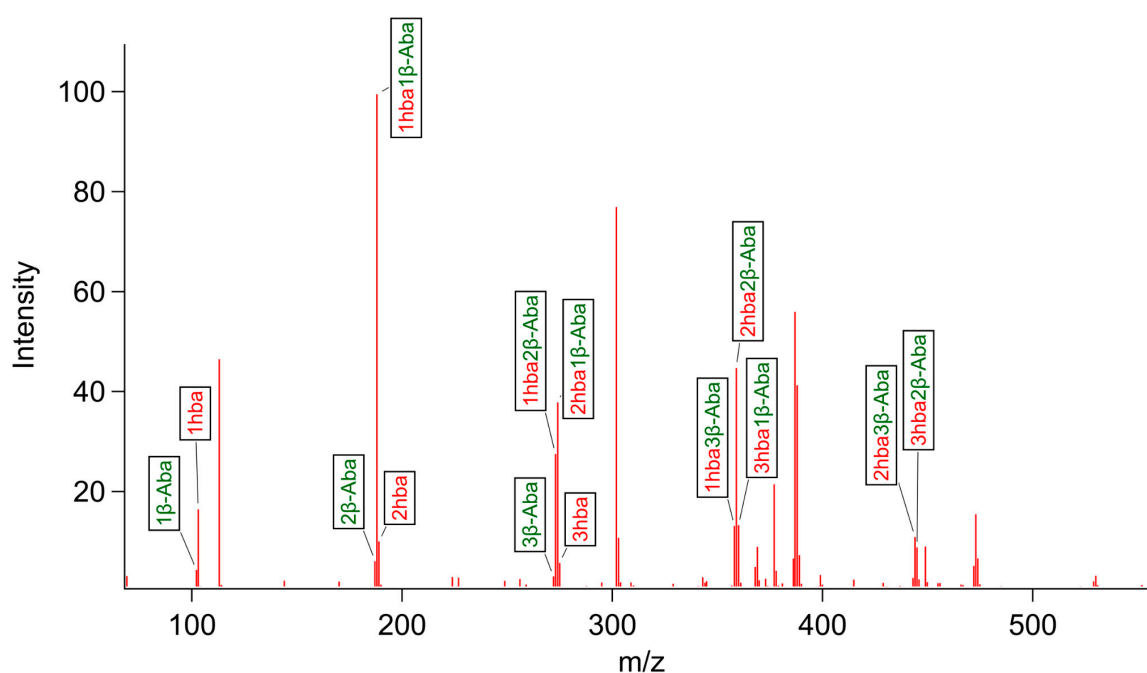

**Figure S79.** ESI-MS of the last cycle in the extended dry/wet cycling reaction of 3-hydroxybutanoic acid (hba) and  $\beta$ -aminobutyric acid ( $\beta$ -Aba) supports the formation of depsipeptides. hba and  $\beta$ -Aba were subjected to weekly dry/wet cycles (4 days dry/3 days wet) at 85 °C for 8 weeks and the resulting depsipeptides from the last cycle (C8) were analyzed by negative-mode ESI-MS, indicating a variety of depsipeptides. **hba** is labeled in red;  $\beta$ -Aba is labeled in green. All labeled species correspond to  $[M-H]^-$  ions.



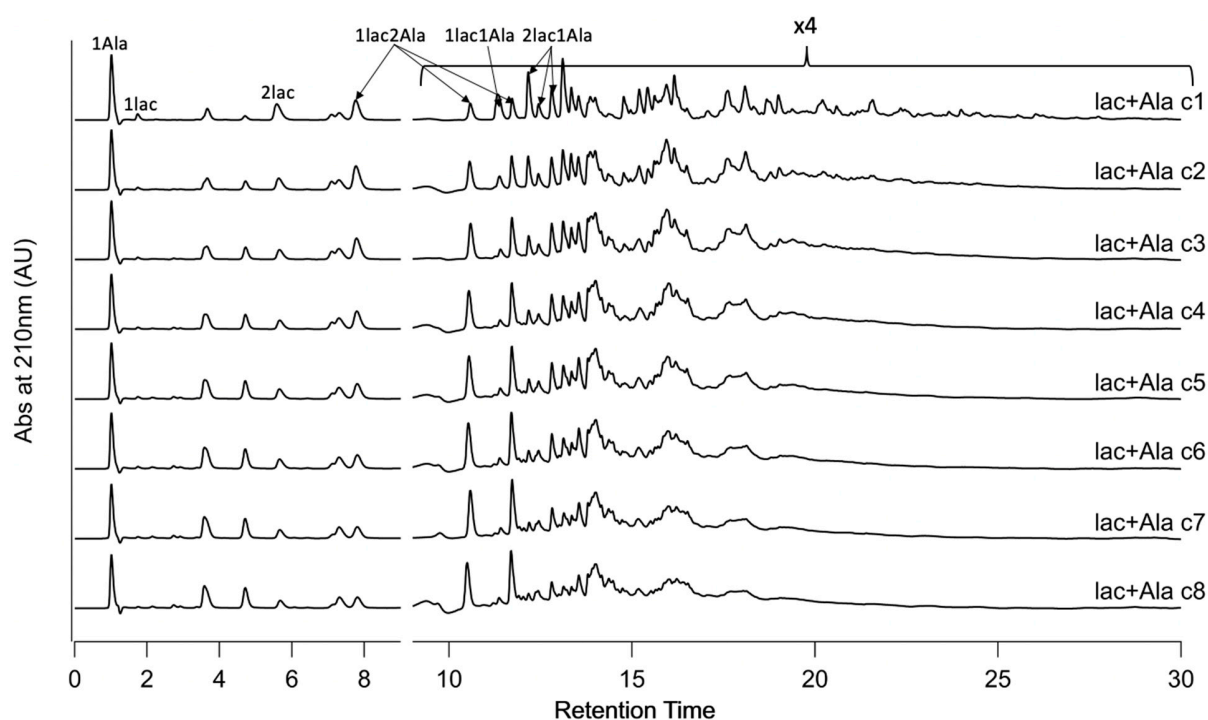

**Figure S80. C18-HPLC analysis following weekly dry/wet cycling of lactic acid (lac) and Alanine (Ala) verifies the formation of depsipeptides.** A mixture of lac and Ala was subjected to weekly dry/wet cycles (4 days dry/3 days wet) at 85 °C for 8 weeks with an aliquot taken at the end of each dry-state for analysis. The resulting product mixture was analyzed by hydrophobicity-based separation using C18-HPLC and the peaks were identified by LC-MS.

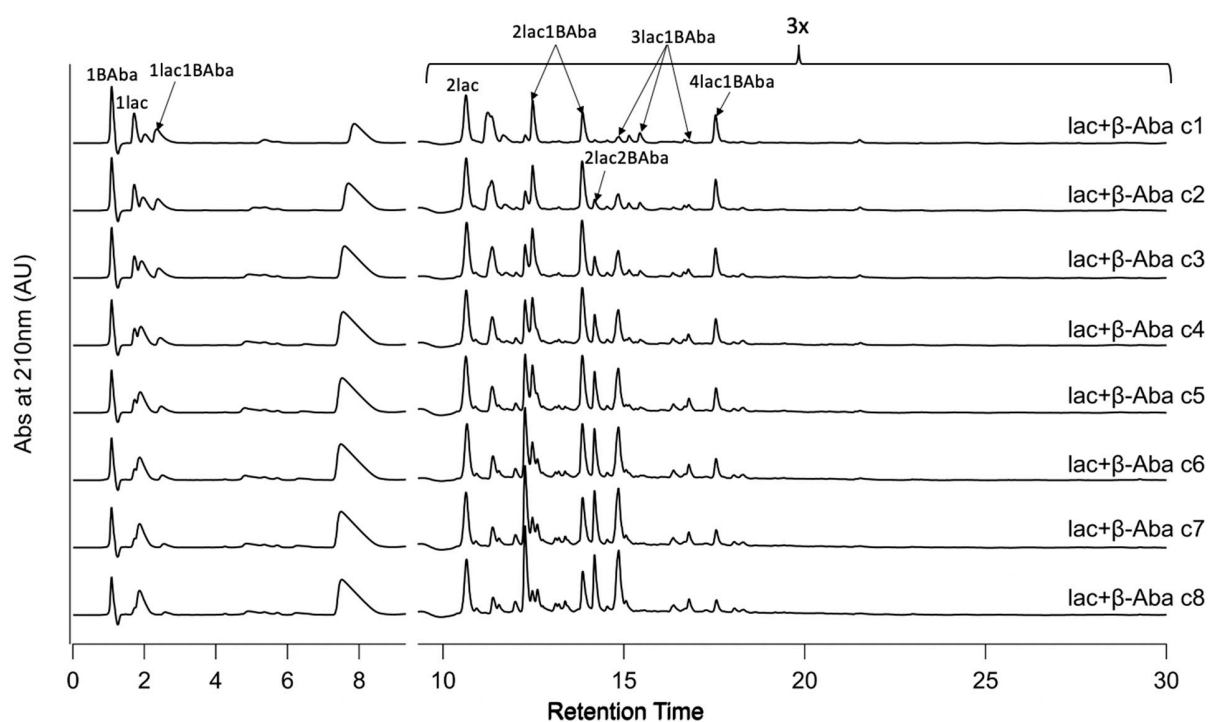

**Figure S81. C18-HPLC analysis following weekly dry/wet cycling of lactic acid (lac) and  $\beta$ -aminobutyric acid ( $\beta$ -Aba) verifies the formation of depsipeptides.** A mixture of lac and  $\beta$ -Aba was subjected to weekly dry/wet cycles (4 days dry/3 days wet) at 85 °C for 8 weeks with an aliquot taken at the end of each dry-state for analysis. The resulting product mixture was analyzed by hydrophobicity-based separation using C18-HPLC and the peaks were identified by LC-MS.

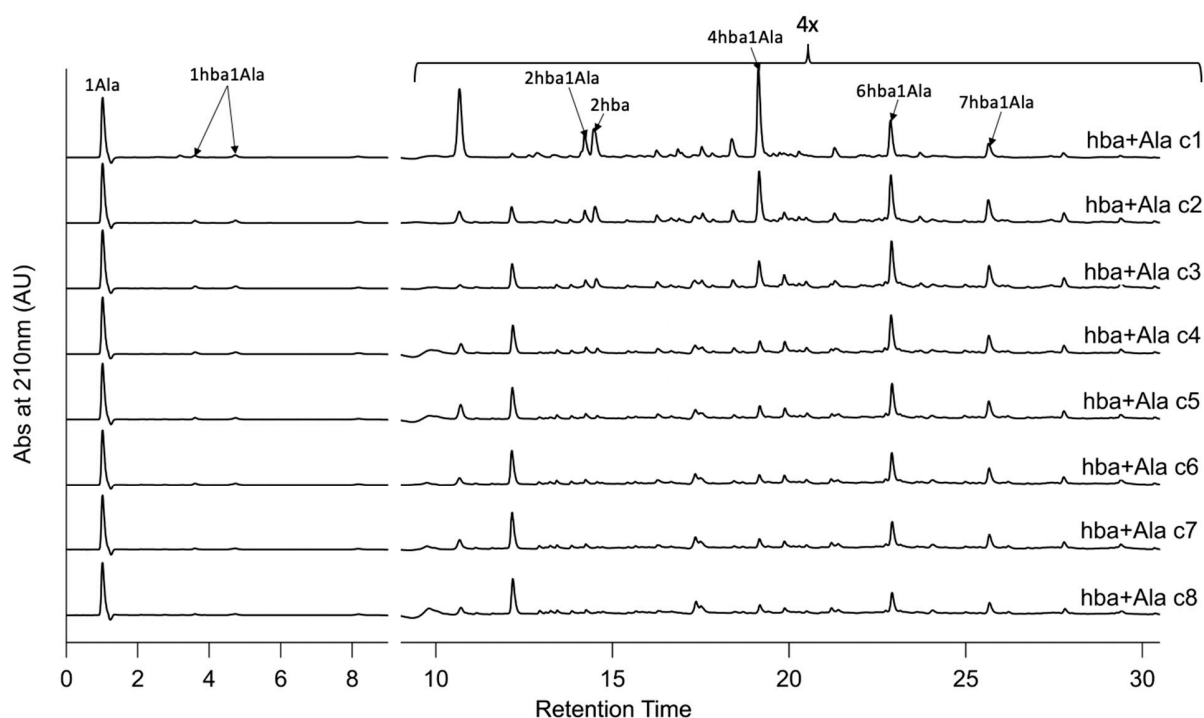

**Figure S82. C18-HPLC analysis following weekly dry/wet cycling of 3-hydroxybutanoic acid (hba) and alanine (Ala) verifies the formation of depsipeptides.** A mixture of **hba** and **Ala** was subjected to weekly dry/wet cycles (4 days dry/3 days wet) at 85 °C for 8 weeks with an aliquot taken at the end of each dry-state for analysis. The resulting product mixture was analyzed by hydrophobicity-based separation using C18-HPLC and the peaks were identified by LC-MS.

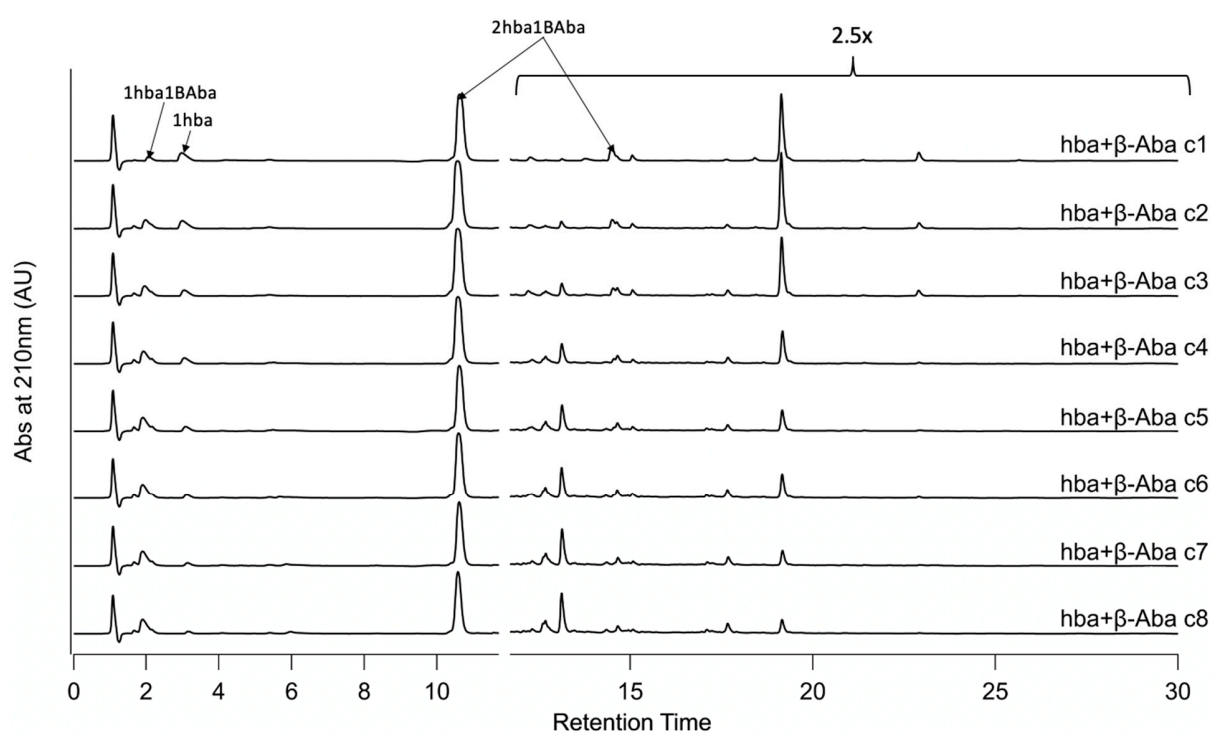

**Figure S83.** C18-HPLC analysis following weekly dry/wet cycling of 3-hydroxybutanoic acid (hba) and β-aminobutyric acid (β-Aba) verifies the formation of depsipeptides. A mixture of hba and β-Aba was subjected to weekly dry/wet cycles (4

days dry/3 days wet) at 85 °C for 8 weeks with an aliquot taken at the end of each dry-state for analysis. The resulting product mixture was analyzed by hydrophobicity-based separation using C18-HPLC and the peaks were identified by LC-MS.

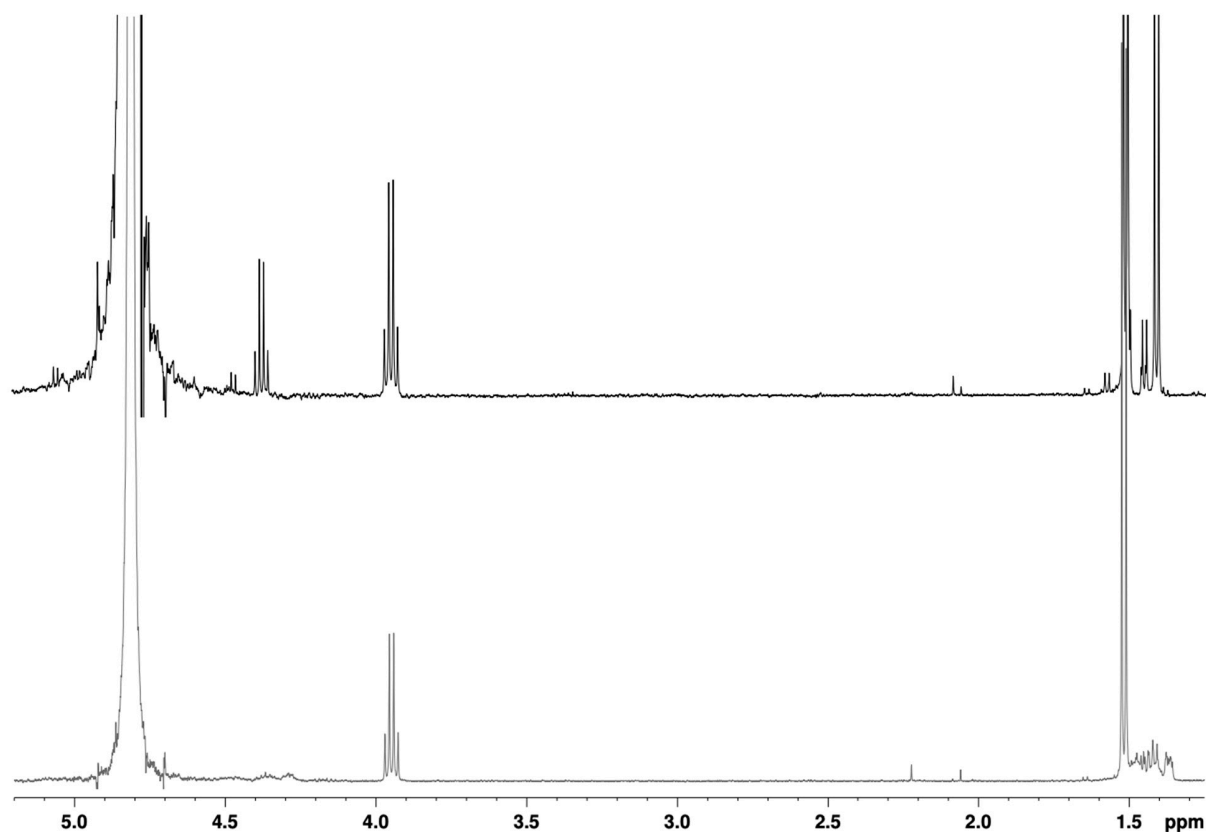

**Figure S84.**  $^1\text{H}$  NMR spectra exhibit the extent of depsipeptide formation upon the final cycle of the extended dry/wet cycling of lactic acid (lac) and alanine (Ala).  $^1\text{H}$  NMR spectra of a mixture of lac and Ala in  $\text{D}_2\text{O}$  before (black) and weekly dry/wet cycling (4 days dry/3 days wet) at  $85^\circ\text{C}$  for 8 weeks (grey) show a 40.1% conversion of Ala into depsipeptide.

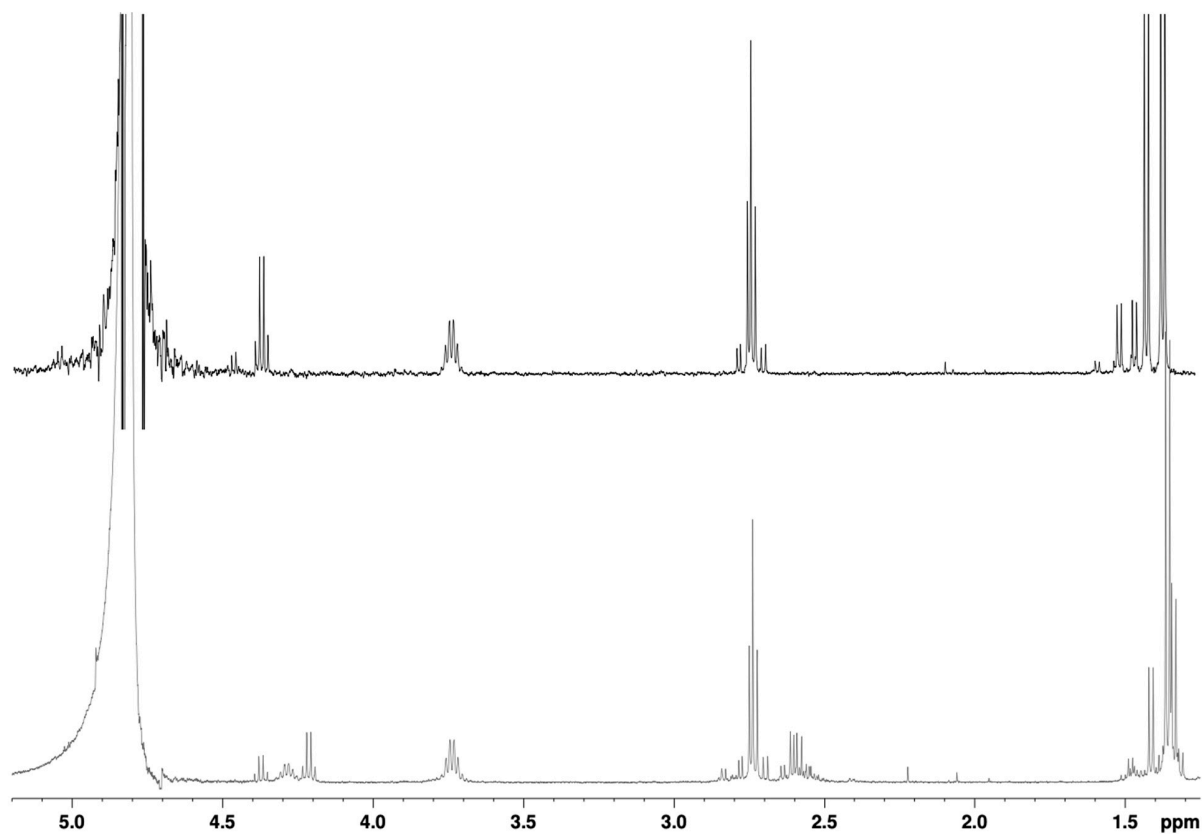

**Figure S85.**  $^1\text{H}$  NMR spectra exhibit the extent of depsipeptide formation upon the final cycle of the extended dry/wet cycling of lactic acid (lac) and  $\beta$ -aminobutyric acid ( $\beta$ -Aba).  $^1\text{H}$  NMR spectra of a mixture of hba and  $\beta$ -Aba in  $\text{D}_2\text{O}$  before (black) and weekly dry/wet cycling (4 days dry/3 days wet) at  $85^\circ\text{C}$  for 8 weeks (grey) show a 47.6% conversion of  $\beta$ -Aba into depsipeptide.

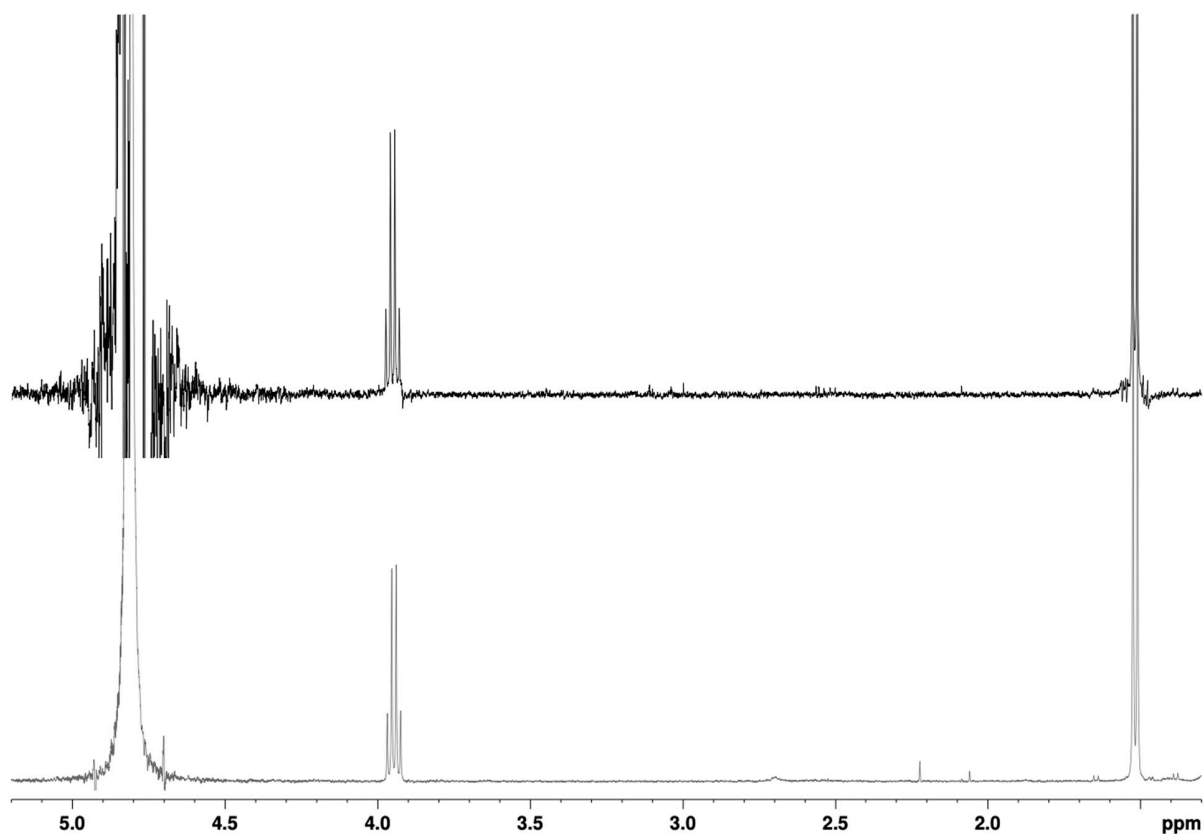

**Figure S86.**  $^1\text{H}$  NMR spectra exhibit the extent of depsipeptide formation upon the final cycle of the extended dry/wet cycling of hydroxybutanoic acid (**hba**) and alanine (**Ala**).  $^1\text{H}$  NMR spectra of a mixture of **hba** and **Ala** in  $\text{D}_2\text{O}$  before (black) and weekly dry/wet cycling (4 days dry/3 days wet) at  $85^\circ\text{C}$  for 8 weeks (grey) show a 26.1% conversion of **Ala** into depsipeptide.



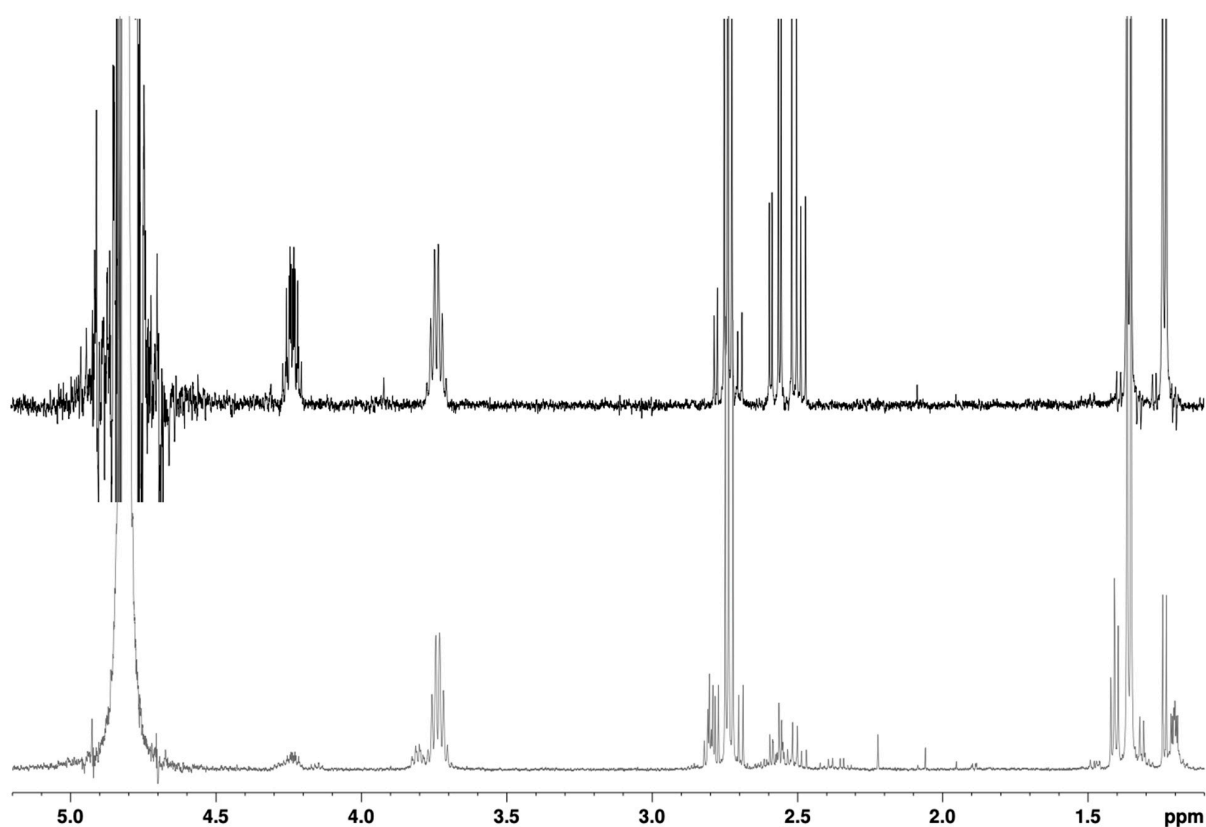

**Figure S87.**  $^1\text{H}$  NMR spectra exhibit the extent of depsipeptide formation upon the final cycle of the extended dry/wet cycling of hydroxybutanoic acid (hba) and  $\beta$ -aminobutyric acid ( $\beta$ -Aba).  $^1\text{H}$  NMR spectra of a mixture of hba and  $\beta$ -Aba in  $\text{D}_2\text{O}$  before (black) and weekly dry/wet cycling (4 days dry/3 days wet) at  $85^\circ\text{C}$  for 8 weeks (grey) show a 25.8% conversion of  $\beta$ -Aba into products.
